# Supplementary material for: Diphenylacetylene stabilised alkali-metal nickelates: synthesis, structure and catalytic applications
Source: Royal Society of Chemistry journal article supplement (doi:10.1039/d3dt00069a), 2023-01-01
Supplement: d3dt00069a1.pdf [file d3dt00069a1.pdf]

**Supporting Information**

**Diphenylacetylene Stabilised Alkali-Metal Nickelates: Synthesis, Structure  
and Catalytic Applications**

Andryj M. Borys,<sup>a</sup> Eva Hevia<sup>a\*</sup>

<sup>a</sup> Departement für Chemie, Biochemie und Pharmazie, Universität Bern, 3012 Bern, Switzerland

## Table of Contents

|                                                                                                                                                                                                                                       |    |
|---------------------------------------------------------------------------------------------------------------------------------------------------------------------------------------------------------------------------------------|----|
| Experimental .....                                                                                                                                                                                                                    | 3  |
| General Considerations .....                                                                                                                                                                                                          | 3  |
| Synthesis of Organolithiums .....                                                                                                                                                                                                     | 3  |
| Synthesis of 4- <sup>t</sup> Bu-C <sub>6</sub> H <sub>4</sub> -Li .....                                                                                                                                                               | 3  |
| Synthesis of 1-Naph-Li .....                                                                                                                                                                                                          | 4  |
| Synthesis of <i>o</i> -Tol-Li .....                                                                                                                                                                                                   | 4  |
| Synthesis of 2,6-Me <sub>2</sub> -C <sub>6</sub> H <sub>3</sub> -Li .....                                                                                                                                                             | 5  |
| Synthesis of 2,2'-Dilithiobiphenyl .....                                                                                                                                                                                              | 5  |
| Synthesis of Known Nickel Complexes .....                                                                                                                                                                                             | 6  |
| Synthesis of [(COD)Ni] <sub>2</sub> {μ <sub>2</sub> :η <sup>2</sup> ,η <sup>2</sup> -Ph-C≡C-Ph} .....                                                                                                                                 | 6  |
| Synthesis of Ni <sub>2</sub> (COT) <sub>2</sub> .....                                                                                                                                                                                 | 6  |
| Synthesis of Alkali-Metals Nickelates .....                                                                                                                                                                                           | 6  |
| Synthesis of Li <sub>2</sub> (Et <sub>2</sub> O) <sub>4</sub> Ph <sub>4</sub> Ni <sub>2</sub> {μ <sub>2</sub> :η <sup>2</sup> ,η <sup>2</sup> -Ph-C≡C-Ph}, <b>1a</b> .....                                                            | 7  |
| Synthesis of Na <sub>2</sub> (THF) <sub>6</sub> Ph <sub>4</sub> Ni <sub>2</sub> {μ <sub>2</sub> :η <sup>2</sup> ,η <sup>2</sup> -Ph-C≡C-Ph}, <b>1b</b> .....                                                                          | 7  |
| Synthesis of K <sub>4</sub> (THF) <sub>4</sub> Ph <sub>4</sub> Ni <sub>2</sub> {μ <sub>2</sub> :η <sup>2</sup> ,η <sup>2</sup> -Ph-C≡C-Ph}, <b>1c</b> .....                                                                           | 8  |
| Synthesis of Li <sub>2</sub> (Et <sub>2</sub> O) <sub>4</sub> (4- <sup>t</sup> Bu-C <sub>6</sub> H <sub>4</sub> ) <sub>4</sub> Ni <sub>2</sub> {μ <sub>2</sub> :η <sup>2</sup> ,η <sup>2</sup> -Ph-C≡C-Ph}, <b>1d</b> .....           | 9  |
| Crystallisation of Li <sub>2</sub> (Et <sub>2</sub> O) <sub>4</sub> ( <i>o</i> -Tol) <sub>4</sub> Ni <sub>2</sub> {μ <sub>2</sub> :η <sup>2</sup> ,η <sup>2</sup> -Ph-C≡C-Ph}, <b>1e</b> .....                                        | 10 |
| Crystallisation of Li <sub>2</sub> (THF) <sub>6</sub> (1-Naph) <sub>4</sub> Ni <sub>2</sub> {μ <sub>2</sub> :η <sup>2</sup> ,η <sup>2</sup> -Ph-C≡C-Ph}, <b>1f</b> .....                                                              | 10 |
| Synthesis of Li <sub>2</sub> (THF) <sub>2</sub> ( <i>o</i> -Tol) <sub>2</sub> Ni{η <sup>2</sup> -Ph-C≡C-Ph}, <b>2a</b> .....                                                                                                          | 11 |
| Synthesis of Li <sub>2</sub> (Et <sub>2</sub> O) <sub>2</sub> (1-Naph) <sub>2</sub> Ni{η <sup>2</sup> -Ph-C≡C-Ph}, <b>2b</b> .....                                                                                                    | 11 |
| Synthesis of Li <sub>2</sub> (Et <sub>2</sub> O) <sub>2</sub> (2,6-Me <sub>2</sub> -C <sub>6</sub> H <sub>3</sub> ) <sub>2</sub> Ni{η <sup>2</sup> -Ph-C≡C-Ph}, <b>2c</b> .....                                                       | 12 |
| Synthesis of Li <sub>2</sub> (THF) <sub>4</sub> (2,2'-biphenyl)Ni{η <sup>2</sup> -Ph-C≡C-Ph}, <b>2d</b> .....                                                                                                                         | 13 |
| NMR Spectroscopy Studies .....                                                                                                                                                                                                        | 14 |
| [(COD)Ni] <sub>2</sub> {μ <sub>2</sub> :η <sup>2</sup> ,η <sup>2</sup> -Ph-C≡C-Ph} + PhLi .....                                                                                                                                       | 14 |
| Variable Temperature NMR Spectroscopy of <b>1d</b> .....                                                                                                                                                                              | 14 |
| Catalytic Reactions .....                                                                                                                                                                                                             | 16 |
| Cyclotrimerisation of Diphenylacetylene .....                                                                                                                                                                                         | 16 |
| Cyclotrimerisation of Phenylacetylene .....                                                                                                                                                                                           | 18 |
| Insertion of Diphenylacetylene into Biphenylene .....                                                                                                                                                                                 | 19 |
| X-ray Crystallography .....                                                                                                                                                                                                           | 20 |
| Molecular Structure of Li <sub>2</sub> (Et <sub>2</sub> O) <sub>4</sub> Ph <sub>4</sub> Ni <sub>2</sub> {μ <sub>2</sub> :η <sup>2</sup> ,η <sup>2</sup> -Ph-C≡C-Ph}, <b>1a</b> .....                                                  | 25 |
| Molecular Structure of Na <sub>2</sub> (THF) <sub>6</sub> Ph <sub>4</sub> Ni <sub>2</sub> {μ <sub>2</sub> :η <sup>2</sup> ,η <sup>2</sup> -Ph-C≡C-Ph}, <b>1b</b> .....                                                                | 25 |
| Molecular Structure of Li <sub>2</sub> (Et <sub>2</sub> O) <sub>4</sub> (4- <sup>t</sup> Bu-C <sub>6</sub> H <sub>4</sub> ) <sub>4</sub> Ni <sub>2</sub> {μ <sub>2</sub> :η <sup>2</sup> ,η <sup>2</sup> -Ph-C≡C-Ph}, <b>1d</b> ..... | 26 |
| Molecular Structure of Li <sub>2</sub> (Et <sub>2</sub> O) <sub>4</sub> ( <i>o</i> -Tol) <sub>4</sub> Ni <sub>2</sub> {μ <sub>2</sub> :η <sup>2</sup> ,η <sup>2</sup> -Ph-C≡C-Ph}, <b>1e</b> .....                                    | 26 |
| Molecular Structure of Li <sub>2</sub> (THF) <sub>6</sub> (1-Naph) <sub>4</sub> Ni <sub>2</sub> {μ <sub>2</sub> :η <sup>2</sup> ,η <sup>2</sup> -Ph-C≡C-Ph}, <b>1f</b> .....                                                          | 27 |
| Molecular Structure of Li <sub>2</sub> (Et <sub>2</sub> O) <sub>2</sub> (2,6-Me <sub>2</sub> -C <sub>6</sub> H <sub>3</sub> ) <sub>2</sub> Ni{η <sup>2</sup> -Ph-C≡C-Ph}, <b>2c</b> .....                                             | 27 |
| Molecular Structure of Li <sub>2</sub> (THF) <sub>4</sub> (2,2'-biphenyl)Ni{η <sup>2</sup> -Ph-C≡C-Ph}, <b>2d</b> .....                                                                                                               | 28 |
| NMR Spectra of Reported Compounds .....                                                                                                                                                                                               | 29 |
| References .....                                                                                                                                                                                                                      | 49 |

## Experimental

### General Considerations

All manipulations were carried out under an inert atmosphere of argon using standard Schlenk line<sup>1</sup> or glovebox techniques (MBraun UNILab Pro ECO, <0.1 ppm H<sub>2</sub>O and O<sub>2</sub>). Due to the extreme air, moisture, and often temperature sensitivity of described compounds, rigorously inert conditions must be maintained to allow for the isolation of crystalline and pure samples. All manipulations, except for the preparation of starting materials, must avoid the use of Teflon-coated stir bars and Teflon cannulae, and glass-coated stir bars should be used. Specific experimental details can be found below. THF was dried and distilled from Na/benzophenone and stored over 4 Å molecular sieves, then further dried and vacuum distilled over NaK<sub>2.8</sub> or a sodium mirror. Hexane, pentane, Et<sub>2</sub>O, toluene and benzene were pre-dried using a MBraun MBSPS 5, then further dried and vacuum distilled over NaK<sub>2.8</sub> or a sodium mirror, and stored over 4 Å molecular sieves. (Me<sub>3</sub>Si)<sub>2</sub>O was dried and distilled over CaH<sub>2</sub> and stored over 4 Å molecular sieves. THF-d<sub>8</sub> and C<sub>6</sub>D<sub>6</sub> were dried and distilled over NaK<sub>2.8</sub> and stored over 4 Å molecular sieves in a glovebox prior to use. Li<sub>4</sub>(Et<sub>2</sub>O)<sub>4</sub>(C≡C-Ph)<sub>4</sub>Ni<sub>2</sub>{μ<sub>2</sub>:η<sup>2</sup>,η<sup>2</sup>-Ph-C≡C-Ph} was prepared as previously described.<sup>2</sup> Ni(COD)<sub>2</sub> was purchased from Sigma-Aldrich. Diphenylacetylene was dried *in vacuo* prior to use. All other reagents were used as supplied.

NMR spectra were recorded on Bruker Avance III HD 300 MHz or 400 MHz spectrometers at 300 K unless otherwise specified. <sup>1</sup>H NMR spectra were referenced internally to the corresponding residual *protio* solvent peaks. CHN elemental microanalyses were performed on a Flash 2000 Organic Elemental Analyser (Thermo Scientific). Samples were prepared and crimped in tin capsules in an argon filled glovebox. Analyses were performed in triplicate, and reference standards (e.g. nicotinamide) were measured prior to use as controls.

### Synthesis of Organolithiums

PhLi and PhNa were prepared as previously reported.<sup>3,4</sup> All other organolithiums were prepared *via* lithium-halogen exchange of the corresponding commercially available iodo- or bromo-arenes and isolated as solids which were stored in a glovebox freezer (-30 °C). When performing the reactions with bromoarenes, it was found that the addition of Et<sub>2</sub>O was necessary to precipitate the product from hexane solution.

### Synthesis of 4-<sup>t</sup>Bu-C<sub>6</sub>H<sub>4</sub>-Li

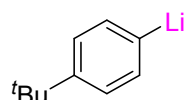

4-*tert*-Butyl-iodobenzene (1.8 mL, 10 mmol) was dissolved in hexane (30 mL) and cooled to -78 °C. <sup>n</sup>BuLi (1.6 M, 6.25 mL, 10 mmol) was added dropwise and the reaction mixture was then slowly warmed to room temperature and stirred for 1 hour to give a colourless suspension. The solids were collected on a glass frit, washed with pentane (2 × 7.5 mL) and dried *in vacuo*. Yield – 1.37 g (98%).

$^1\text{H NMR}$  (300.1 MHz, 5:1  $\text{C}_6\text{D}_6/\text{THF-d}_8$ ):  $\delta$  8.29 (d,  $J = 7.7$  Hz, 2H,  $o\text{-CH}$ ), 7.37 (d,  $J = 7.7$  Hz, 2H,  $m\text{-CH}$ ), 1.40 (s, 9H,  $^t\text{Bu-C}(\text{CH}_3)_3$ ).

$^7\text{Li NMR}$  (116.6 MHz, 5:1  $\text{C}_6\text{D}_6/\text{THF-d}_8$ ):  $\delta$  2.21 (s).

$^{13}\text{C}\{^1\text{H}\}$  NMR (75.5 MHz, 5:1  $\text{C}_6\text{D}_6/\text{THF-d}_8$ ):  $\delta$  177.4 (s,  $ipso\text{-C}$ ), 146.4 (s,  $\text{C-}^t\text{Bu}$ ), 143.5 (s,  $o\text{-CH}$ ), 122.8 (s,  $m\text{-CH}$ ), 34.7 (s,  $^t\text{Bu-C}(\text{CH}_3)_3$ ), 32.3 (s,  $^t\text{Bu-C}(\text{CH}_3)_3$ ).

### Synthesis of 1-Naph-Li

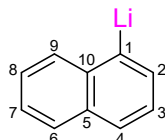

1-Bromonaphthalene (1.4 mL, 10 mmol) was dissolved in hexane (30 mL) and cooled to  $-78$  °C.  $^n\text{BuLi}$  (1.6 M, 6.25 mL, 10 mmol) was added dropwise and the reaction mixture was then slowly warmed to room temperature and stirred for 1 hour to give a colourless solution.  $\text{Et}_2\text{O}$  (2.5 mL) was slowly added leading to the precipitation of a colourless solid. After stirring for an additional 30 minutes at room temperature, the solids were collected on a glass frit, washed with hexane ( $2 \times 7.5$  mL) and dried *in vacuo*. Yield – 1.125 g (72%).

$^1\text{H NMR}$  spectroscopy indicates 0.3 equivalents of coordinated  $\text{Et}_2\text{O}$ .

$^1\text{H NMR}$  (300.1 MHz, 5:1  $\text{C}_6\text{D}_6/\text{THF-d}_8$ ):  $\delta$  8.57 (d,  $J = 6.0$  Hz, 1H,  $H_9$ ), 8.47 (d,  $J = 8.1$  Hz, 1H,  $H_2$ ), 7.87 (d,  $J = 7.9$  Hz, 1H,  $H_7$ ), 7.74 (d,  $J = 7.9$  Hz, 1H,  $H_8$ ), 7.57–7.46 (m, 2H,  $H_{3,4}$ ), 7.40 (dt,  $J = 1.1, 7.8$  Hz, 1H,  $H_6$ ), 3.26 (q,  $\text{Et}_2\text{O}$ ), 1.08 (t,  $\text{Et}_2\text{O}$ ).

$^7\text{Li NMR}$  (116.6 MHz, 5:1  $\text{C}_6\text{D}_6/\text{THF-d}_8$ ):  $\delta$  2.40 (s).

$^{13}\text{C}\{^1\text{H}\}$  NMR (75.5 MHz, 5:1  $\text{C}_6\text{D}_6/\text{THF-d}_8$ ):  $\delta$  192.8 (s,  $\text{C1}$ ), 148.8 (s,  $\text{C10}$ ), 141.3 (s,  $\text{C9}$ ), 138.3 (s,  $\text{C2}$ ), 134.1 (s,  $\text{C5}$ ), 129.3 (s,  $\text{C7}$ ), 124.8 (s,  $\text{C4}$ ), 124.4 (s,  $\text{C8}$ ), 123.9 (s,  $\text{C6}$ ), 122.9 (s,  $\text{C3}$ ), 66.2 (s,  $\text{Et}_2\text{O}$ ), 15.9 (s,  $\text{Et}_2\text{O}$ ).

### Synthesis of *o*-Tol-Li

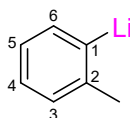

2-Bromotoluene (1.2 mL, 10 mmol) was dissolved in hexane (30 mL) and cooled to  $-78$  °C.  $^n\text{BuLi}$  (1.6 M, 6.25 mL, 10 mmol) was added dropwise and the reaction mixture was then slowly warmed to room temperature and stirred for 2 hours to give a colourless solution.  $\text{Et}_2\text{O}$  (2.5 mL) was slowly added leading to the precipitation of a colourless solid. After stirring for an additional hour at room temperature, the solids were collected on a glass frit, washed with hexane ( $2 \times 7.5$  mL) and dried *in vacuo*. Yield – 0.76 g (78%).

$^1\text{H NMR}$  spectroscopy indicates 1% residual coordinated  $\text{Et}_2\text{O}$ .

**$^1\text{H}$  NMR** (300.1 MHz, 5:1  $\text{C}_6\text{D}_6/\text{THF-d}_8$ ):  $\delta$  8.26–8.19 (m, 1H, H6), 7.37–7.22 (m, 3H, H3,4,5), 2.78 (s, 3H, CH<sub>3</sub>).

**$^7\text{Li}$  NMR** (116.6 MHz, 5:1  $\text{C}_6\text{D}_6/\text{THF-d}_8$ ):  $\delta$  2.03 (s).

**$^{13}\text{C}\{^1\text{H}\}$  NMR** (75.5 MHz, 5:1  $\text{C}_6\text{D}_6/\text{THF-d}_8$ ):  $\delta$  183.9 (s, C1), 151.0 (s, C2), 143.5 (s, C6), 125.5, 125.3, 123.1 (s, C4), 29.5 (s, CH<sub>3</sub>).

### Synthesis of 2,6-Me<sub>2</sub>-C<sub>6</sub>H<sub>3</sub>-Li

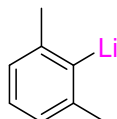

2-Iodo-1,3-dimethylbenzene (1 mL, 6.9 mmol) was dissolved in hexane (20 mL) and cooled to  $-78\text{ }^\circ\text{C}$ .  $n\text{BuLi}$  (1.6 M, 4.3 mL, 6.9 mmol) was added dropwise and the reaction mixture was then slowly warmed to room temperature and stirred for 1 hour to give a colourless suspension. The solids were collected on a glass frit, washed with hexane ( $2 \times 5\text{ mL}$ ) and dried *in vacuo*. Yield – 723 mg (93%).

**$^1\text{H}$  NMR** (300.1 MHz, 5:1  $\text{C}_6\text{D}_6/\text{THF-d}_8$ ):  $\delta$  7.38–7.32 (m, 1H, p-CH), 7.30–7.25 (m, 2H, m-CH), 2.95 (s, 6H, o-CH<sub>3</sub>). AA'B spin system.

**$^7\text{Li}$  NMR** (116.6 MHz, 5:1  $\text{C}_6\text{D}_6/\text{THF-d}_8$ ):  $\delta$  2.72 (s).

**$^{13}\text{C}\{^1\text{H}\}$  NMR** (75.5 MHz, 5:1  $\text{C}_6\text{D}_6/\text{THF-d}_8$ ):  $\delta$  181.2 (s, ipso-C), 150.3 (s, C-CH<sub>3</sub>), 126.1 (s, p-CH), 123.2 (s, m-CH), 29.1 (s, C-CH<sub>3</sub>).

### Synthesis of 2,2'-Dilithiobiphenyl

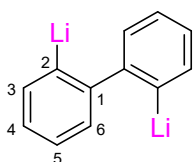

Adapted from literature procedures.<sup>5</sup> 2,2'-Dibromobiphenyl (1.248 g, 4 mmol) was dissolved in hexane (40 mL) and cooled to  $-78\text{ }^\circ\text{C}$ .  $n\text{BuLi}$  (1.6 M, 5.25 mL, 8.4 mmol) was added dropwise and the reaction was maintained at  $-78\text{ }^\circ\text{C}$  for 1 hour then warmed to room temperature and stirred for 48 hours to give a colourless suspension. The solids were collected on a glass frit, washed with hexane ( $2 \times 10\text{ mL}$ ) and dried *in vacuo*. Yield – 610 mg (92%).

Samples may contain small amounts of the mono-lithiated species which can be removed by recrystallisation from THF (5 mL per 100 mg; 54% recovery as  $\text{THF}_{1.75}$  solvate).

**$^1\text{H}$  NMR** (300.1 MHz,  $\text{THF-d}_8$ ):  $\delta$  8.00–7.91 (m, 4H, H3 + H6), 7.11 (t,  $J = 7.0\text{ Hz}$ , 2H, H5), 6.87 (t,  $J = 7.0\text{ Hz}$ , 2H, H4), 3.62 (m, THF), 1.78 (m, THF).

**$^7\text{Li}$  NMR** (116.6 MHz,  $\text{THF-d}_8$ ):  $\delta$  2.18 (s).

$^{13}\text{C}\{^1\text{H}\}$  NMR (75.5 MHz, THF- $d_8$ ):  $\delta$  176.0 (br,  $\underline{\text{C2}}$ ), 156.5 ( $\underline{\text{C1}}$ ), 143.9 ( $\underline{\text{C3}}$ ), 127.0 ( $\underline{\text{C5}}$ ), 124.1 ( $\underline{\text{C4}}$  +  $\underline{\text{C6}}$ ), 68.4 (THF), 26.6 (THF).

## Synthesis of Known Nickel Complexes

### Synthesis of $[(\text{COD})\text{Ni}]_2\{\mu_2:\eta^2,\eta^2\text{-Ph-C}\equiv\text{C-Ph}\}$

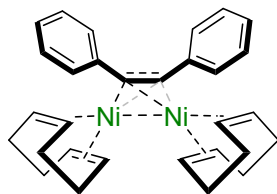

$[(\text{COD})\text{Ni}]_2\{\mu_2:\eta^2,\eta^2\text{-Ph-C}\equiv\text{C-Ph}\}$  was prepared according to literature procedures.<sup>6</sup> The previously missing  $^{13}\text{C}\{^1\text{H}\}$  NMR spectroscopic data is provided for completeness.

$^1\text{H}$  NMR (300.1 MHz,  $\text{C}_6\text{D}_6$ ):  $\delta$  7.46 (d,  $J = 7.7$  Hz, 4H,  $o\text{-CH}$ ), 7.21 (t,  $J = 7.3, 7.7$  Hz, 4H,  $m\text{-CH}$ ), 7.06 (t,  $J = 7.3$  Hz, 2H,  $p\text{-CH}$ ), 5.17 (m, 4H, COD- $\underline{\text{CH}}$ ), 4.79 (m, 4H, COD- $\underline{\text{CH}}$ ), 2.35–2.19 (m, 4H, COD- $\underline{\text{CH}_2}$ ), 2.06–1.93 (m, 4H, COD- $\underline{\text{CH}_2}$ ), 1.90–1.80 (m, 4H, COD- $\underline{\text{CH}_2}$ ), 1.80–1.68 (m, 4H, COD- $\underline{\text{CH}_2}$ ).

$^{13}\text{C}\{^1\text{H}\}$  NMR (75.5 MHz,  $\text{C}_6\text{D}_6$ ):  $\delta$  142.3 ( $ipso\text{-}\underline{\text{C}}$ ), 129.1 ( $o\text{-}\underline{\text{CH}}$ ), 127.1 ( $m\text{-}\underline{\text{CH}}$ ), 124.2 ( $p\text{-}\underline{\text{CH}}$ ), 106.9 ( $\text{Ph-}\underline{\text{C}}\equiv\text{C-Ph}$ ), 100.5 (COD- $\underline{\text{CH}}$ ), 97.2 (COD- $\underline{\text{CH}}$ ), 31.3 (COD- $\underline{\text{CH}_2}$ ), 30.5 (COD- $\underline{\text{CH}_2}$ ).

### Synthesis of $\text{Ni}_2(\text{COT})_2$

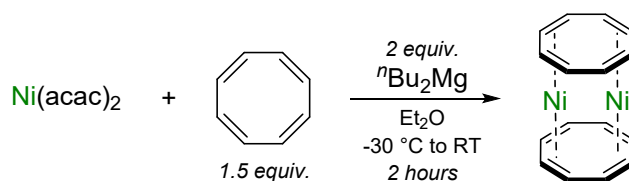

Freshly sublimed and finely ground anhydrous  $\text{Ni}(\text{acac})_2$  (1.028 g, 4 mmol) and cyclooctatetraene (0.7 mL, 6 mmol, 1.5 equiv) were combined in  $\text{Et}_2\text{O}$  (20 mL) and cooled to  $-30$  °C.  $n\text{Bu}_2\text{Mg}$  (16 mL, 0.5M, 8 mmol, 2 equiv) was added dropwise and the reaction mixture was allowed to warm to room temperature and stir for 2 hours. Over the course of the reaction, the green  $\text{Ni}(\text{acac})_2$  is consumed and a tan solid precipitates from solution. The supernatant was removed *via* filter cannula and the solids were washed with  $\text{Et}_2\text{O}$  ( $2 \times 10$  mL) and dried *in vacuo*. Yield – 642 mg (98%).

$\text{Ni}_2(\text{COT})_2$  is poorly soluble in most organic solvents.  $\text{Ni}_2\text{COT}_2$  is pyrophoric!

$^1\text{H}$  NMR (300.1 MHz,  $\text{C}_6\text{D}_6$ ):  $\delta$  4.64 (s,  $\underline{\text{CH}}$ ).

$^{13}\text{C}\{^1\text{H}\}$  NMR (75.5 MHz,  $\text{C}_6\text{D}_6$ ):  $\delta$  79.2 (s,  $\underline{\text{CH}}$ ).

### Synthesis of Alkali-Metals Nickelates

All alkali-metal nickelates were prepared in an argon filled glovebox using glass-coated stir bars unless otherwise specified. This is due to their propensity to decompose when placed under prolonged vacuum (due to facile desolvation), as well as their reaction towards PTFE (stir bars and cannulae) which limits manipulation using standard Schlenk line techniques.

### Synthesis of $\text{Li}_2(\text{Et}_2\text{O})_4\text{Ph}_4\text{Ni}_2\{\mu_2:\eta^2,\eta^2\text{-Ph-C}\equiv\text{C-Ph}\}$ , **1a**

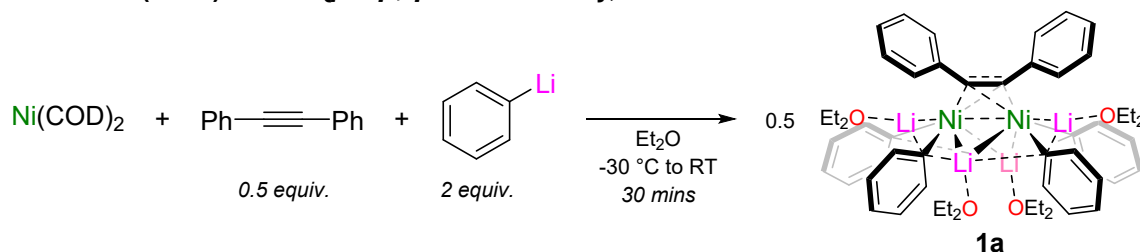

$\text{Ni}(\text{COD})_2$  (138 mg, 0.5 mmol) and diphenylacetylene (45 mg, 0.25 mmol, 0.5 equiv) were combined in  $\text{Et}_2\text{O}$  (5 mL) and stirred at room temperature for 15 minutes. The resulting ruby/purple solution was cooled to  $-30\text{ }^\circ\text{C}$  in a glovebox freezer then  $\text{PhLi}$  (84 mg, 1 mmol, 2 equiv) was added. The deep red reaction mixture was warmed to room temperature, stirred for 30 minutes, then evaporated to dryness. The residues were washed with hexane (1 mL) then extracted into hexane (1 mL) and  $\text{Et}_2\text{O}$  (2.5 mL), filtered through a glass wool plug and stored at  $-30\text{ }^\circ\text{C}$  for 1 week affording a crop of dark red crystals. The supernatant was decanted, and the solids were washed with cold pentane ( $2 \times 0.5\text{ mL}$ ) and dried under argon. Yield – 96 mg (41%). The crystals obtained *via* this method were suitable for single-crystal X-ray diffraction studies.

**$^1\text{H}$  NMR** (300.1 MHz,  $\text{C}_6\text{D}_6$ ):  $\delta$  8.35 (d,  $J = 6.6\text{ Hz}$ , 8H,  $\text{Ph-Ni-}o\text{-CH}$ ), 7.60 (m, 4H,  $\text{Ph-C}\equiv\text{C-Ph-}o\text{-CH}$ ), 7.20 (t,  $J = 7.4, 7.7\text{ Hz}$ , 4H,  $\text{Ph-C}\equiv\text{C-Ph-}m\text{-CH}$ ), 7.06–6.97 (m, 8H + 2H,  $\text{Ph-Ni-}m\text{-CH}$  and  $\text{Ph-C}\equiv\text{C-Ph-}p\text{-CH}$ ), 6.81 (m, 4H,  $\text{Ph-Ni-}p\text{-CH}$ ), 2.76 (q,  $\text{Et}_2\text{O}$ ), 0.71 (t,  $\text{Et}_2\text{O}$ ).

**$^7\text{Li}$  NMR** (116.6 MHz,  $\text{C}_6\text{D}_6$ ):  $\delta$  0.66 (br).

**$^{13}\text{C}\{^1\text{H}\}$  NMR** (75.5 MHz,  $\text{C}_6\text{D}_6$ ):  $\delta$  182.0 ( $\text{Ph-Ni-}ipso\text{-C}$ ), 151.3 ( $\text{Ph-C}\equiv\text{C-Ph-}ipso\text{-C}$ ), 143.4 ( $\text{Ph-Ni-}o\text{-CH}$ ), 128.9 ( $\text{Ph-C}\equiv\text{C-Ph-}m\text{-CH}$ ), 128.5 ( $\text{Ph-Ni-}m\text{-CH}$ ), 127.9 ( $\text{Ph-C}\equiv\text{C-Ph-}o\text{-CH}$ ), 123.0 ( $\text{Ph-Ni-}p\text{-CH}$ ), 120.3 ( $\text{Ph-C}\equiv\text{C-Ph-}p\text{-CH}$ ), 71.2 ( $\text{Ph-C}\equiv\text{C-Ph}$ ), 65.7 ( $\text{Et}_2\text{O}$ ), 14.9 ( $\text{Et}_2\text{O}$ ).

**Elemental Analysis:** Calculated for  $\text{C}_{54}\text{H}_{70}\text{Li}_4\text{Ni}_2\text{O}_4$ : C, 69.87; H, 7.60. Found: C, 69.97; H, 7.36.

### Synthesis of $\text{Na}_2(\text{THF})_6\text{Ph}_4\text{Ni}_2\{\mu_2:\eta^2,\eta^2\text{-Ph-C}\equiv\text{C-Ph}\}$ , **1b**

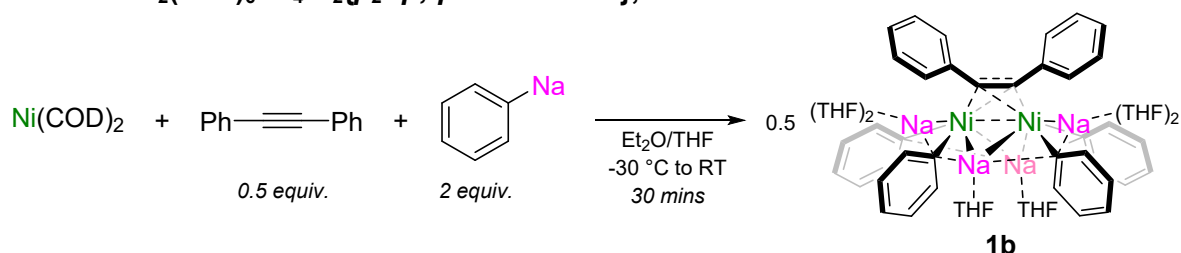

$\text{Ni}(\text{COD})_2$  (55 mg, 0.2 mmol) and diphenylacetylene (18 mg, 0.1 mmol, 0.5 equiv) were combined in  $\text{Et}_2\text{O}$  (2 mL) and stirred at room temperature for 15 minutes. The resulting ruby/purple solution was cooled to  $-30\text{ }^\circ\text{C}$  in a glovebox freezer then  $\text{PhNa}$  (40 mg, 0.4 mmol, 2 equiv) was added. The deep red reaction mixture was warmed to room temperature, stirred for 30 minutes, then filtered through a glass wool plug. THF (0.2 mL) was added to the filtrate which was then stored at  $-30\text{ }^\circ\text{C}$  for 1 week affording a crop of large dark red/black crystals. The supernatant was decanted, and the solids were

washed with cold pentane (2 × 0.5 mL) and dried under argon. Yield – 51 mg (45%). The crystals obtained *via* this method were suitable for single-crystal X-ray diffraction studies.

Crystalline samples were plagued with Ni(COD)<sub>2</sub> and another unidentified impurity and could therefore not be obtained in analytically pure form using this method.

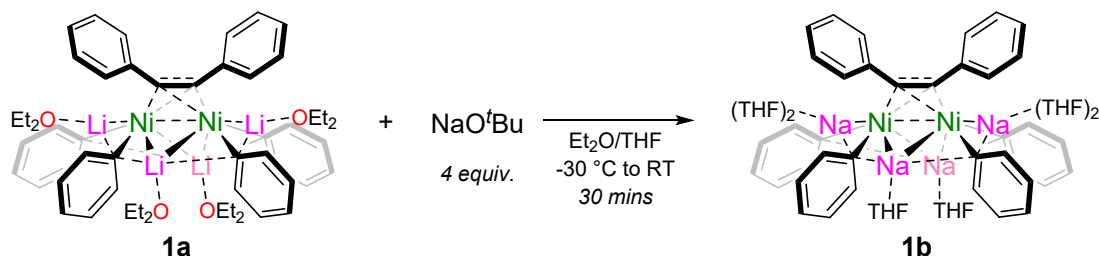

**1a** (46.4 mg, 0.05 mmol) was dissolved in Et<sub>2</sub>O (2 mL) and cooled to -30 °C. NaO<sup>t</sup>Bu (19.2 mg, 0.20 mmol, 4 equiv.) was then added and the deep red reaction mixture was warmed to room temperature and stirred for 30 minutes. THF (0.2 mL) was added and the reaction mixture was filtered through glass wool, layered with pentane (2.5 mL), then stored at -30 °C for 48 hours affording dark red/black crystals. The supernatant was decanted, and the solids were washed with cold pentane (2 × 0.5 mL), and dried under argon. Yield – 27 mg (55%).

**<sup>1</sup>H NMR** (300.1 MHz, THF-*d*<sub>8</sub>): δ 7.96 (d, *J* = 6.7 Hz, 8H, Ph-Ni-*o*-CH), 7.10 (d, *J* = 7.3 Hz, 4H, Ph-C≡C-Ph-*o*-CH), 6.68 (t, *J* = 7.3 Hz, 4H, Ph-C≡C-Ph-*m*-CH), 6.55 (t, *J* = 7.2 Hz, 8H, Ph-Ni-*m*-CH), 6.41-6.32 (m, 4H + 2H, Ph-Ni-*p*-CH + Ph-C≡C-Ph-*p*-CH), 3.62 (m, THF), 1.78 (m, THF).

**<sup>13</sup>C{<sup>1</sup>H} NMR** (75.5 MHz, THF-*d*<sub>8</sub>): δ 195.8 (Ph-Ni-*ipso*-C), 156.9 (Ph-C≡C-Ph-*ipso*-C), 142.6 (Ph-Ni-*o*-CH), 128.4 (Ph-C≡C-Ph-*o*-CH), 127.5 (Ph-C≡C-Ph-*m*-CH), 125.7 (Ph-Ni-*m*-CH), 118.3 (Ph-Ni-*p*-CH), 114.3 (Ph-C≡C-Ph-*p*-CH), 68.6 (Ph-C≡C-Ph), 68.4 (THF), 26.6 (THF).

**Elemental Analysis:** Calculated for C<sub>54</sub>H<sub>62</sub>Na<sub>4</sub>Ni<sub>2</sub>O<sub>4</sub>: C, 65.89; H, 6.35. Found: C, 65.80; H, 6.99.

#### Synthesis of K<sub>4</sub>(THF)<sub>4</sub>Ph<sub>4</sub>Ni<sub>2</sub>{μ<sub>2</sub>:η<sup>2</sup>,η<sup>2</sup>-Ph-C≡C-Ph}, **1c**

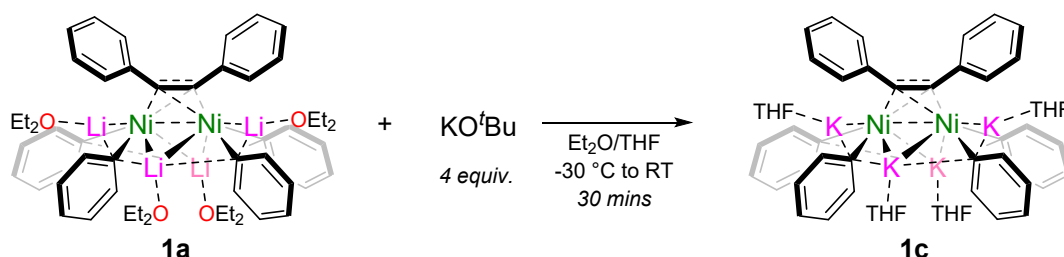

**1a** (46.4 mg, 0.05 mmol) was dissolved in Et<sub>2</sub>O (2 mL) and cooled to -30 °C. KO<sup>t</sup>Bu (22.4 mg, 0.20 mmol, 4 equiv.) was then added and the deep red reaction mixture was warmed to room temperature and stirred for 30 minutes. THF (0.5 mL) was added and reaction mixture was filtered through glass wool, layered with pentane (2.5 mL), then stored at -30 °C for 48 hours affording a dark red/purple



microcrystalline solid. The supernatant was decanted, and the solids were washed with cold pentane (2 × 0.5 mL), and dried under argon. Yield – 37 mg (79%).

Single crystals of **1c** were observed to immediately desolvate and lose crystallinity when removed from the mother liquor. Attempts to grow single crystals with the aid of other donors such as TMEDA, DME, 1,4-dioxane or PMDETA failed.

**<sup>1</sup>H NMR** (300.1 MHz, THF-*d*<sub>8</sub>): δ 7.88 (d, *J* = 6.3 Hz, 8H, Ph-Ni-*o*-CH), 6.96 (d, *J* = 7.1 Hz, 4H, Ph-C≡C-Ph-*o*-CH), 6.62 (t, *J* = 7.1 Hz, 4H, Ph-C≡C-Ph-*m*-CH), 6.45 (t, *J* = 7.3 Hz, 8H, Ph-Ni-*m*-CH), 6.29–6.19 (m, 6H, Ph-Ni-*p*-CH + Ph-C≡C-Ph-*p*-CH), 3.62 (m, THF), 1.78 (m, THF).

**<sup>13</sup>C{<sup>1</sup>H} NMR** (75.5 MHz, THF-*d*<sub>8</sub>): δ 203.8 (Ph-Ni-*ipso*-C), 158.1 (Ph-C≡C-Ph-*ipso*-C), 142.6 (Ph-Ni-*o*-CH), 127.7 (Ph-C≡C-Ph-*m*-CH), 127.4 (Ph-C≡C-Ph-*o*-CH), 124.9 (Ph-Ni-*m*-CH), 116.4 (Ph-Ni-*p*-CH), 111.7 (Ph-C≡C-Ph-*p*-CH), 74.1 (Ph-C≡C-Ph), 68.4 (THF), 26.6 (THF).

**Elemental Analysis:** Calculated for C<sub>54</sub>H<sub>62</sub>K<sub>4</sub>Ni<sub>2</sub>O<sub>4</sub>: C, 61.84; H, 5.96. Found: C, 62.17; H, 5.62.

### Synthesis of Li<sub>2</sub>(Et<sub>2</sub>O)<sub>4</sub>(4-*t*Bu-C<sub>6</sub>H<sub>4</sub>)<sub>4</sub>Ni<sub>2</sub>{μ<sub>2</sub>:η<sup>2</sup>,η<sup>2</sup>-Ph-C≡C-Ph}, **1d**

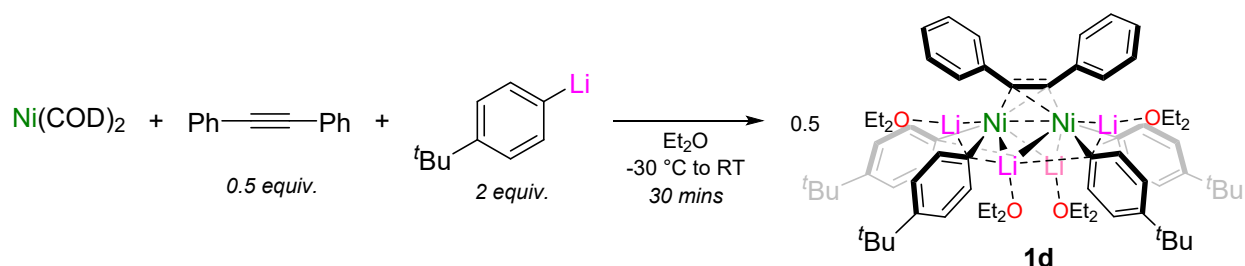

Ni(COD)<sub>2</sub> (55 mg, 0.2 mmol) and diphenylacetylene (18 mg, 0.1 mmol, 0.5 equiv) were combined in Et<sub>2</sub>O (2 mL) and stirred at room temperature for 15 minutes. The resulting ruby/purple solution was cooled to -30 °C in a glovebox freezer then 4-*t*Bu-C<sub>6</sub>H<sub>4</sub>-Li (56.1 mg, 0.4 mmol, 2 equiv) was added. The deep red reaction mixture was warmed to room temperature and stirred for 30 minutes then filtered through Celite/glass wool. Storage of the filtrate at -30 °C for 48 hours afforded a crop of dark red needles. The supernatant was decanted, and the solids were washed with cold pentane (2 × 0.5 mL) and dried under argon. Yield – 38 mg (33%). The crystals obtained *via* this method were suitable for single-crystal X-ray diffraction studies.

**<sup>1</sup>H NMR** (400.1 MHz, THF-*d*<sub>8</sub>, -40 °C): δ 8.69 (d, *J* = 7.8 Hz, 4H, 4-*t*Bu-C<sub>6</sub>H<sub>4</sub>-Ni-*o*-CH), 7.79 (d, *J* = 7.6 Hz, 4H, 4-*t*Bu-C<sub>6</sub>H<sub>4</sub>-Ni-*o*-CH), 7.27 (d, *J* = 7.3 Hz, 4H, Ph-C≡C-Ph-*o*-CH), 6.94 (dd, *J* = 2.0, 7.8 Hz, 4H, 4-*t*Bu-C<sub>6</sub>H<sub>4</sub>-Ni-*m*-CH), 6.73 (t, *J* = 7.2 Hz, 4H, Ph-C≡C-Ph-*m*-CH), 6.65 (dd, *J* = 2.0, 7.6 Hz, 4H, 4-*t*Bu-C<sub>6</sub>H<sub>4</sub>-Ni-*m*-CH), 6.52 (t, *J* = 7.2 Hz, 2H, Ph-C≡C-Ph-*p*-CH), 3.39 (q, Et<sub>2</sub>O), 1.13 (t, Et<sub>2</sub>O), 1.12 (s, 36H, 4-*t*Bu-C<sub>6</sub>H<sub>4</sub>-Ni).

**<sup>7</sup>Li NMR** (155.5 MHz, THF-*d*<sub>8</sub>, -40 °C): δ 0.26 (br), -0.59 (s).

$^{13}\text{C}\{^1\text{H}\}$  NMR (100.6 MHz, THF- $d_8$ ,  $-40\text{ }^\circ\text{C}$ ):  $\delta$  181.9 (br, 4- $t$ Bu-C $_6$ H $_4$ -Ni-*ipso*-C), 157.1 (s, Ph-C $\equiv$ C-Ph-*ipso*-C), 144.0 (s, 4- $t$ Bu-C $_6$ H $_4$ -Ni-*o*-CH), 143.1 (s, 4- $t$ Bu-C $_6$ H $_4$ -Ni-*o*-CH), 141.4 (s, C- $t$ Bu), 130.6 (s, Ph-C $\equiv$ C-Ph-*m*-CH), 129.3 (s, 4- $t$ Bu-C $_6$ H $_4$ -Ni-*p*-CH), 126.6 (s, Ph-C $\equiv$ C-Ph-*o*-CH), 123.7 (s, 4- $t$ Bu-C $_6$ H $_4$ -Ni-*m*-CH), 123.1 (s, 4- $t$ Bu-C $_6$ H $_4$ -Ni-*m*-CH), 118.3 (s, Ph-C $\equiv$ C-Ph-*p*-CH), 76.6 (br, (s, Ph-C $\equiv$ C-Ph), 66.7 (Et $_2$ O), 34.5 (s, C(CH $_3$ ) $_3$ ), 32.0 (s, C(CH $_3$ ) $_3$ ), 16.0 (s, Et $_2$ O).

**Elemental Analysis:** Calculated for C $_{70}$ H $_{102}$ Li $_4$ Ni $_2$ O $_4$ : C, 72.94; H, 8.92. Found: C, 73.17; H, 8.40.

### Crystallisation of Li $_2$ (Et $_2$ O) $_4$ (*o*-Tol) $_4$ Ni $_2$ { $\mu_2$ : $\eta^2$ , $\eta^2$ -Ph-C $\equiv$ C-Ph}, **1e**

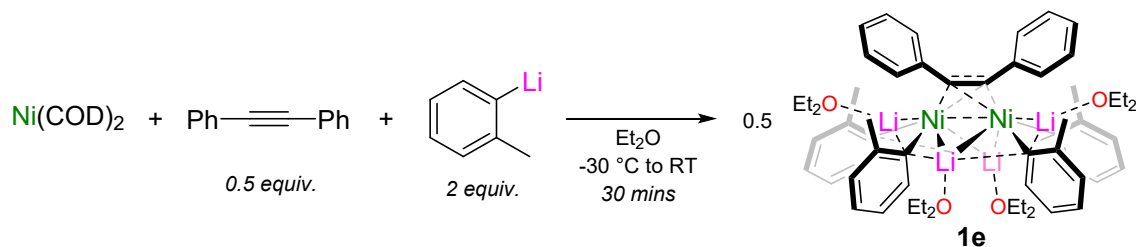

Ni(COD) $_2$  (27.5 mg, 0.1 mmol) and diphenylacetylene (9 mg, 0.05 mmol, 0.5 equiv) were combined in Et $_2$ O (1 mL) and stirred at room temperature for 15 minutes. The resulting ruby/purple solution was cooled to  $-30\text{ }^\circ\text{C}$  in a glovebox freezer then *o*-Tol-Li (19.6 mg, 0.2 mmol, 2 equiv) was added. The deep red reaction mixture was warmed to room temperature and stirred for 30 minutes. Hexane (1 mL) was added to the reaction mixture, which was then filtered through Celite/glass wool. Storage of the filtrate at  $-30\text{ }^\circ\text{C}$  for 48 hours afforded dark red single crystals of **1e** alongside Ni(COD) $_2$ .

Compound **1e** could not be isolated in pure form.

### Crystallisation of Li $_2$ (THF) $_6$ (1-Naph) $_4$ Ni $_2$ { $\mu_2$ : $\eta^2$ , $\eta^2$ -Ph-C $\equiv$ C-Ph}, **1f**

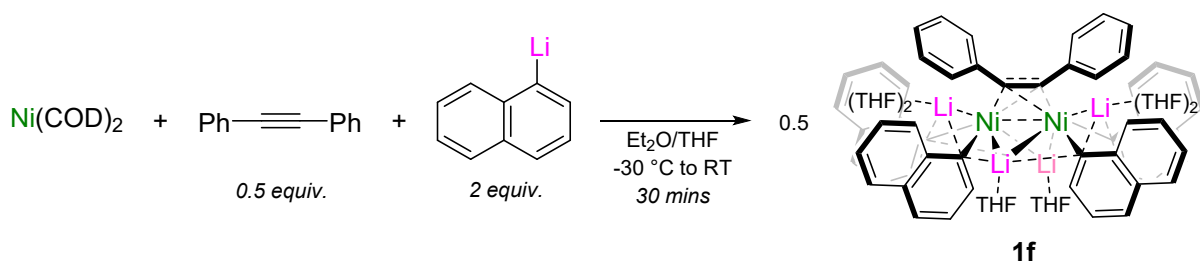

Ni(COD) $_2$  (27.5 mg, 0.1 mmol) and diphenylacetylene (17.8 mg, 0.1 mmol, 1 equiv) were combined in Et $_2$ O (1 mL) and stirred at room temperature for 15 minutes. The resulting ruby/purple solution was cooled to  $-30\text{ }^\circ\text{C}$  in a glovebox freezer then 1-Naph-Li (31.3 mg, 0.2 mmol, 2 equiv) was added. The deep red reaction mixture was warmed to room temperature and stirred for 30 minutes. Hexane (1 mL) was added to the reaction mixture, which was then filtered through Celite/glass wool. THF (0.1 mL) was added to the filtrate and storage at  $-30\text{ }^\circ\text{C}$  for 48 hours afforded dark red/purple single crystals of **1f**.

Compound **1f** could not be isolated in pure form.

## Synthesis of $\text{Li}_2(\text{THF})_2(\text{o-Tol})_2\text{Ni}\{\eta^2\text{-Ph-C}\equiv\text{C-Ph}\}$ , **2a**

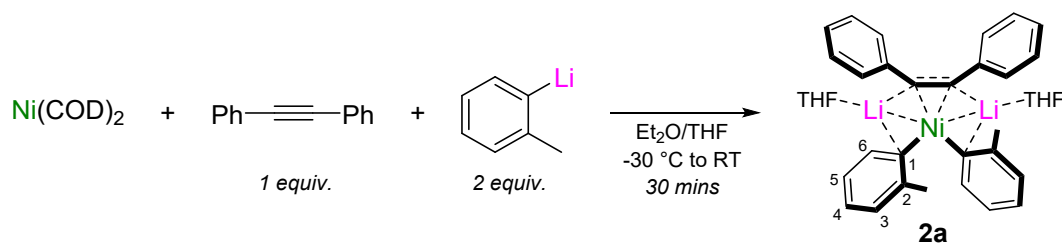

$\text{Ni}(\text{COD})_2$  (55 mg, 0.2 mmol) and diphenylacetylene (36 mg, 0.2 mmol, 1 equiv) were combined in  $\text{Et}_2\text{O}$  (2 mL) and stirred at room temperature for 15 minutes. The resulting ruby/purple solution was cooled to  $-30\text{ }^\circ\text{C}$  in a glovebox freezer then *o*-Tol-Li (39.2 mg, 0.4 mmol, 2 equiv) was added. The deep red reaction mixture was warmed to room temperature and stirred for 30 minutes then filtered through a glass wool plug. THF (0.2 mL) was added to the filtrate and storage at  $-30\text{ }^\circ\text{C}$  for 48 hours afforded red polycrystalline crystals. The supernatant was decanted and the solids were washed with cold pentane (0.5 mL) and dried under argon. Yield – 34 mg (29%).

Despite repeated efforts and changing the donor/solvent, it was not possible to grow single crystals of **2a** suitable for X-ray diffraction studies.

**$^1\text{H}$  NMR** (300.1 MHz,  $\text{THF-d}_8$ ):  $\delta$  7.80 (dd,  $J = 2.0, 6.3$  Hz, 2H, H6), 7.01–6.91 (m, 8H, Ph-C $\equiv$ C-Ph-*o,m*-CH), 6.76 (tt,  $J = 2.3, 6.3$  Hz, 2H, H4), 6.66 (dd,  $J = 1.9, 6.3$  Hz, 2H, H3), 6.53–6.42 (m, 4H, H5 + Ph-C $\equiv$ C-Ph-*p*-CH), 3.63 (m, THF), 2.70 (s, 6H, CH<sub>3</sub>), 1.78 (m, THF).

**$^7\text{Li}$  NMR** (116.6 MHz,  $\text{THF-d}_8$ ):  $\delta$  0.24 (s).

**$^{13}\text{C}\{^1\text{H}\}$  NMR** (75.5 MHz,  $\text{THF-d}_8$ ):  $\delta$  182.9 (s, C1), 150.8 (s, Ph-C $\equiv$ C-Ph), 150.2 (s, C2), 144.7 (s, Ph-C $\equiv$ C-Ph-*ipso*-C), 142.8 (s, C6), 128.4 (s, Ph-C $\equiv$ C-Ph-*m*-CH), 126.6 (s, Ph-C $\equiv$ C-Ph-*o*-CH), 125.5 (s, C3), 123.0 (s, C4), 122.6 (s, Ph-C $\equiv$ C-Ph-*p*-CH), 120.8 (s, C5), 68.4 (s, THF), 30.0 (s, CH<sub>3</sub>), 26.5 (s, THF).

**Elemental Analysis:** Despite appearing pure by multinuclear NMR spectroscopy (see Spectra S30–32), combustion values were considerably lower than expected and inconsistent between repeat samples suggesting incomplete combustion.

## Synthesis of $\text{Li}_2(\text{Et}_2\text{O})_2(1\text{-Naph})_2\text{Ni}\{\eta^2\text{-Ph-C}\equiv\text{C-Ph}\}$ , **2b**

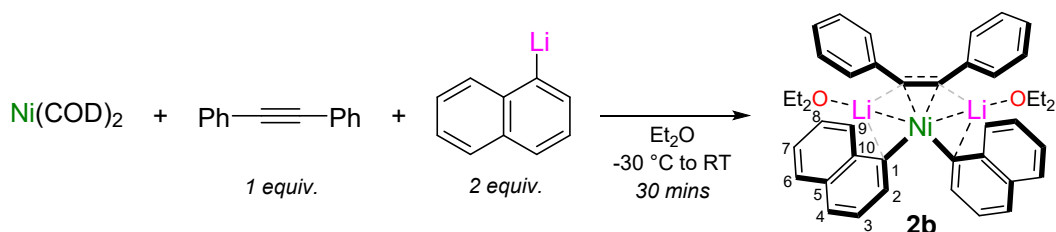

$\text{Ni}(\text{COD})_2$  (55 mg, 0.2 mmol) and diphenylacetylene (36 mg, 0.2 mmol, 1 equiv) were combined in  $\text{Et}_2\text{O}$  (2 mL) and stirred at room temperature for 15 minutes. The resulting ruby/purple solution was cooled

to -30 °C in a glovebox freezer then 1-Naph-Li (63 mg, 0.4 mmol, 2 equiv) was added. The deep red reaction mixture was warmed to room temperature and stirred for 30 minutes then filtered through glass wool. Pentane (2 mL) was added to the filtrate and storage at -30 °C for 48 hours afforded a deep red polycrystalline solid. The supernatant was decanted, and the solids were washed with cold pentane (2 × 0.5 mL) and dried under argon. Yield – 38 mg (29%).

Despite repeated efforts and changing the donor/solvent, it was not possible to grow single crystals of **2b** suitable for X-ray diffraction studies.

**<sup>1</sup>H NMR** (300.1 MHz, THF-*d*<sub>8</sub>): δ 9.56 (d, *J* = 8.1 Hz, 2H, H9), 7.84 (d, *J* = 6.0 Hz, 2H, H2), 7.47 (d, *J* = 7.5 Hz, 2H, H4), 7.27 (td, *J* = 8.1, 6.7, 1.3 Hz, 2H, H8), 7.18 (td, *J* = 8.1, 6.7, 1.3 Hz, 2H, H7), 7.08–6.98 (m, 6H, Ph-C≡C-Ph-*m*-CH + H3), 6.92 (t, *J* = 7.7 Hz, 4H, Ph-C≡C-Ph-*o*-CH), 6.79–6.69 (m, 4H, Ph-C≡C-Ph-*p*-CH + H6), 3.41 (q, Et<sub>2</sub>O), 1.14 (t, Et<sub>2</sub>O).

**<sup>7</sup>Li NMR** (116.6 MHz, THF-*d*<sub>8</sub>): δ 0.14 (s).

**<sup>13</sup>C{<sup>1</sup>H} NMR** (75.5 MHz, THF-*d*<sub>8</sub>): δ 191.1 (s, C1), 150.5 (s, Ph-C≡C-Ph-*ipso*-C), 147.3 (s, C10), 143.6 (s, Ph-C≡C-Ph), 139.6 (s, C9), 139.1 (s, C2), 134.5 (s, C5), 128.4 (s, Ph-C≡C-Ph-*m*-CH), 128.3 (s, C4), 127.0 (s, Ph-C≡C-Ph-*o*-CH), 124.9 (s, C6), 124.3 (s, C7), 122.9 (s, Ph-C≡C-Ph-*p*-CH), 121.7 (s, C8), 120.3 (s, C3), 66.5 (s, Et<sub>2</sub>O), 15.9 (s, Et<sub>2</sub>O).

**Elemental Analysis:** Calculated for C<sub>42</sub>H<sub>44</sub>Li<sub>2</sub>NiO<sub>2</sub>: C, 77.21; H, 6.79. Found: C, 76.87; H, 6.51.

### Synthesis of Li<sub>2</sub>(Et<sub>2</sub>O)<sub>2</sub>(2,6-Me<sub>2</sub>-C<sub>6</sub>H<sub>3</sub>)<sub>2</sub>Ni{*η*<sup>2</sup>-Ph-C≡C-Ph}, **2c**

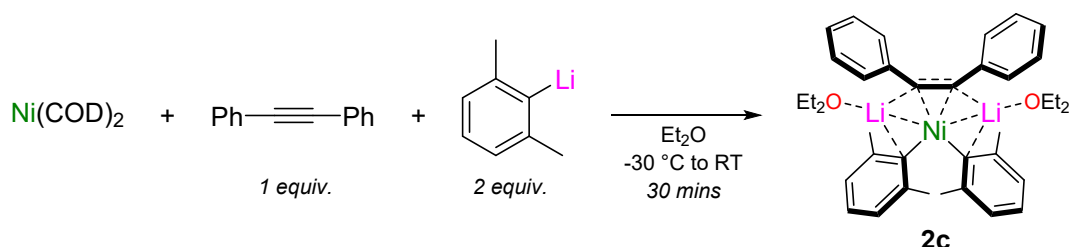

Ni(COD)<sub>2</sub> (55 mg, 0.2 mmol) and diphenylacetylene (36 mg, 0.2 mmol, 1 equiv) were combined in Et<sub>2</sub>O (2 mL) and stirred at room temperature for 15 minutes. The resulting ruby/purple solution was cooled to -30 °C in a glovebox freezer then 2,6-Me<sub>2</sub>-C<sub>6</sub>H<sub>3</sub>-Li (45 mg, 0.4 mmol, 2 equiv) was added. The deep red reaction mixture was warmed to room temperature and stirred for 30 minutes then filtered through Celite/glass wool. Pentane (2 mL) was added to the filtrate and storage at -30 °C for 48 hours afforded deep red crystals of **2c**. The supernatant was decanted, and the solids were washed with cold pentane (2 × 0.5 mL) and dried under argon. Yield – 52 mg (41%). The crystals obtained *via* this method were suitable for single-crystal X-ray diffraction studies.

**<sup>1</sup>H NMR** (300.1 MHz, THF-*d*<sub>8</sub>): δ 7.06-6.94 (m, 8H, Ph-C≡C-Ph-*o,m*-CH), 6.78 (t, *J* = 6.9 Hz, 2H, Ph-C≡C-Ph-*p*-CH), 6.53-6.42 (m, 6H, *Xy-m,p*-CH), 3.40 (q, Et<sub>2</sub>O), 2.63 (s, 12H, *Xy-CH*<sub>3</sub>), 1.13 (t, Et<sub>2</sub>O).

$^7\text{Li}$  NMR (116.6 MHz, THF- $d_8$ ):  $\delta$  0.17 (s).

$^{13}\text{C}\{^1\text{H}\}$  NMR (75.5 MHz, THF- $d_8$ ):  $\delta$  177.2 (Xy-Ni-*ipso*-C), 150.7 (Ph-C $\equiv$ C-Ph-*ipso*-C), 150.4 (Xy-C-CH<sub>3</sub>), 144.6 (Ph-C $\equiv$ C-Ph), 128.5 (Ph-C $\equiv$ C-Ph-*m*-CH), 126.4 (Ph-C $\equiv$ C-Ph-*o*-CH), 123.2 (Xy-*m*-CH), 122.7 (Ph-C $\equiv$ C-Ph-*p*-CH), 121.7 (Xy-*p*-CH), 66.5 (Et<sub>2</sub>O), 30.0 (Xy-CH<sub>3</sub>), 15.9 (Et<sub>2</sub>O).

**Elemental Analysis:** Calculated for C<sub>38</sub>H<sub>48</sub>Li<sub>2</sub>NiO<sub>2</sub>: C, 74.90; H, 7.94. Found: C, 74.47; H, 7.94.

### Synthesis of Li<sub>2</sub>(THF)<sub>4</sub>(2,2'-biphenyl)Ni{ $\eta^2$ -Ph-C $\equiv$ C-Ph}, **2d**

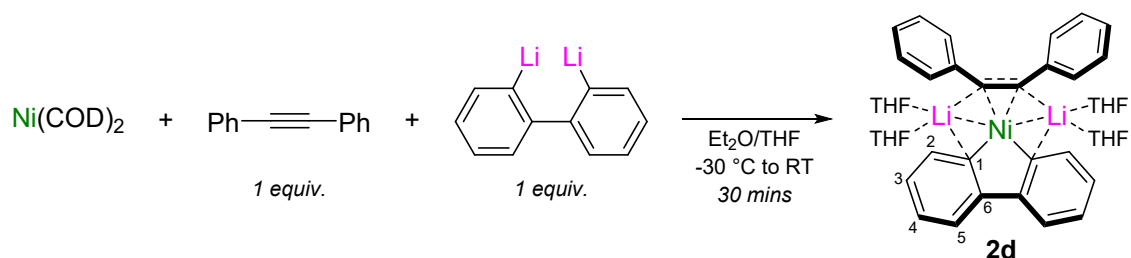

2,2'-Dilithiobiphenyl (55 mg, 0.2 mmol) was dissolved in Et<sub>2</sub>O (2 mL) and cooled to -30 °C. Ni(COD)<sub>2</sub> (55 mg, 0.2 mmol) was added and the reaction was then warmed to room temperature. THF (2 mL) was added, and the dark red solution was stirred for 1 hour. Diphenylacetylene (36 mg, 0.2 mmol) was added resulting in a colour change to blood red, and the solution was stirred for a further 30 minutes at room temperature. Layering with pentane (2 mL) and storage at -30 °C for 1 week afforded **2d** as dark red blocky crystals. The supernatant was decanted, and the solids were washed with cold pentane (2 × 0.5 mL) and dried under argon. Yield – 66 mg (48%). The crystals obtained *via* this method were suitable for single-crystal X-ray diffraction studies.

$^1\text{H}$  NMR (300.1 MHz, THF- $d_8$ ):  $\delta$  8.19 (m, 2H, H2), 7.32-7.26 (m, 6H, Ph-C $\equiv$ C-Ph-*o,p*-CH), 7.09 (m, 4H, Ph-C $\equiv$ C-Ph-*m*-CH), 6.83 (m, 2H, H3), 6.75 (m, 2H, H4), 6.70 (m, 2H, H5), 3.62 (m, THF), 1.77 (m, THF).

$^7\text{Li}$  NMR (116.6 MHz, THF- $d_8$ ):  $\delta$  0.06 (s).

$^{13}\text{C}\{^1\text{H}\}$  NMR (75.5 MHz, THF- $d_8$ ):  $\delta$  180.2 (C1), 161.0 (C6), 156.7 (Ph-C $\equiv$ C-Ph-*ipso*-C), 144.9 (Ph-C $\equiv$ C-Ph), 144.5 (C2), 128.4 (Ph-C $\equiv$ C-Ph-*m*-CH), 127.0 (Ph-C $\equiv$ C-Ph-*o*-CH), 124.6 (C5), 122.5 (C3), 121.7 (C4), 118.8 (Ph-C $\equiv$ C-Ph-*p*-CH), 68.4 (THF), 26.6 (THF).

**Elemental Analysis:** Calculated for C<sub>43</sub>H<sub>53</sub>Li<sub>2</sub>NiO<sub>4</sub>: C, 73.11; H, 7.56. Found: C, 72.69; H, 7.26.

## NMR Spectroscopy Studies

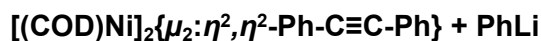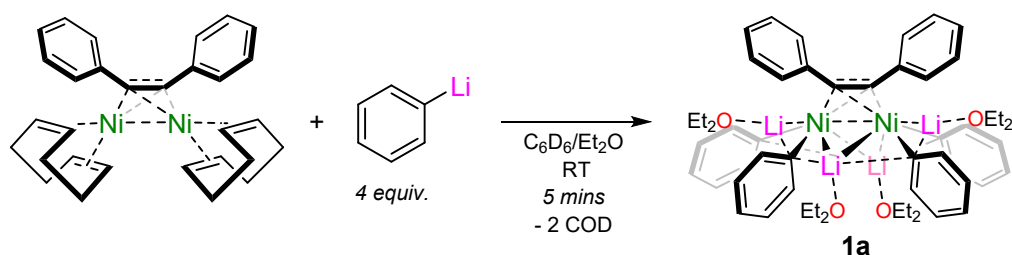

$[(\text{COD})\text{Ni}]_2\{\mu_2:\eta^2,\eta^2\text{-Ph-C}\equiv\text{C-Ph}\}$  (14.3 mg, 0.025 mmol) was dissolved in  $\text{C}_6\text{D}_6$  (0.5 mL) and a  $^1\text{H}$  NMR spectrum was recorded (Figure S1, blue trace). PhLi (8.4 mg, 0.10 mmol, 4 equiv) was dissolved in  $\text{Et}_2\text{O}$  (0.1 mL) and added to the NMR tube to give a deep red solution. The  $^1\text{H}$  NMR spectrum (Figure S1, red trace) shows clean conversion to  $\text{Li}_2(\text{Et}_2\text{O})_4\text{Ph}_4\text{Ni}_2\{\mu_2:\eta^2,\eta^2\text{-Ph-C}\equiv\text{C-Ph}\}$  (**1a**) alongside COD as the sole by-product.

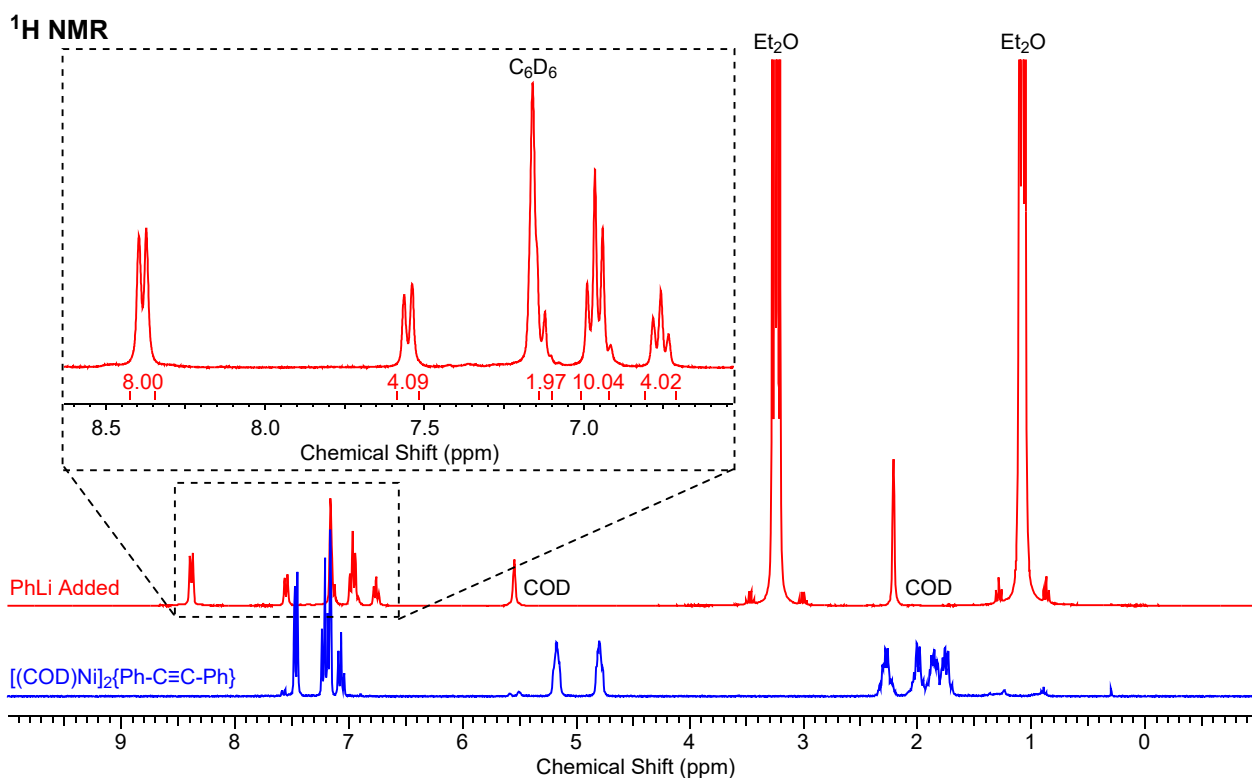

**Figure S1:** Stacked  $^1\text{H}$  NMR spectra showing the reaction of  $[(\text{COD})\text{Ni}]_2\{\mu_2:\eta^2,\eta^2\text{-Ph-C}\equiv\text{C-Ph}\}$  with four equivalents of PhLi in  $\text{C}_6\text{D}_6$  and  $\text{Et}_2\text{O}$  to form  $\text{Li}_2(\text{Et}_2\text{O})_4\text{Ph}_4\text{Ni}_2\{\mu_2:\eta^2,\eta^2\text{-Ph-C}\equiv\text{C-Ph}\}$  (**1a**).

### Variable Temperature NMR Spectroscopy of **1d**

**1d** (30 mg) was added to a J. Young's NMR tube, dissolved in  $\text{THF-d}_8$  (0.5 mL) and analysed by  $^1\text{H}$  and  $^7\text{Li}$  NMR spectroscopy at  $+60\text{ }^\circ\text{C}$ ,  $+40\text{ }^\circ\text{C}$ ,  $+20\text{ }^\circ\text{C}$ ,  $0\text{ }^\circ\text{C}$ ,  $-20\text{ }^\circ\text{C}$  and  $-40\text{ }^\circ\text{C}$  (Figures S2–3). A  $^{13}\text{C}\{^1\text{H}\}$  NMR spectrum was also recorded at  $-40\text{ }^\circ\text{C}$  (see Spectra S29). The fluxional behaviour is attributed to restricted rotation around the  $\text{Ni-C}_{\text{Ar}}$  bonds where rotation is frozen at low temperatures ( $-40\text{ }^\circ\text{C}$ , purple trace, Figure S1), giving rise to two unique signals for both the *ortho* and *meta* aromatic

protons. These signals coalesce at higher temperature (+60 °C, red trace, Figure S1) to give a single signal for both *ortho* and *meta* proton signals. Similarly, the  $^7\text{Li}$  NMR spectrum displays a single broad peak at +60 °C (red trace, Figure S2) which splits into two broad signals at -40 °C (purple trace, Figure S2).

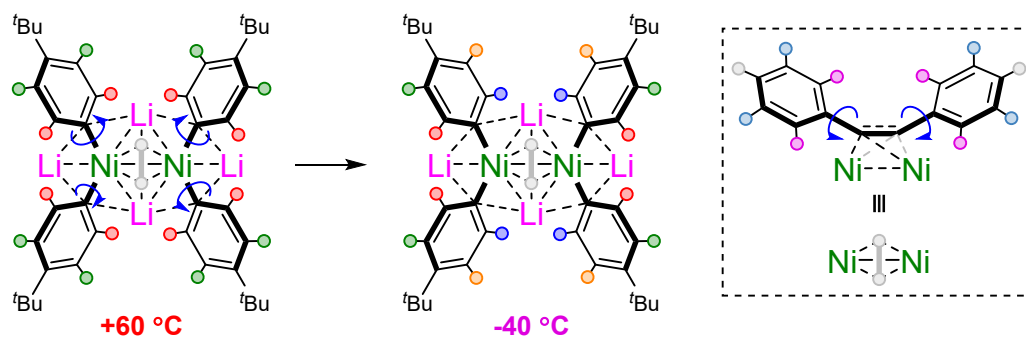

### $^1\text{H}$ NMR

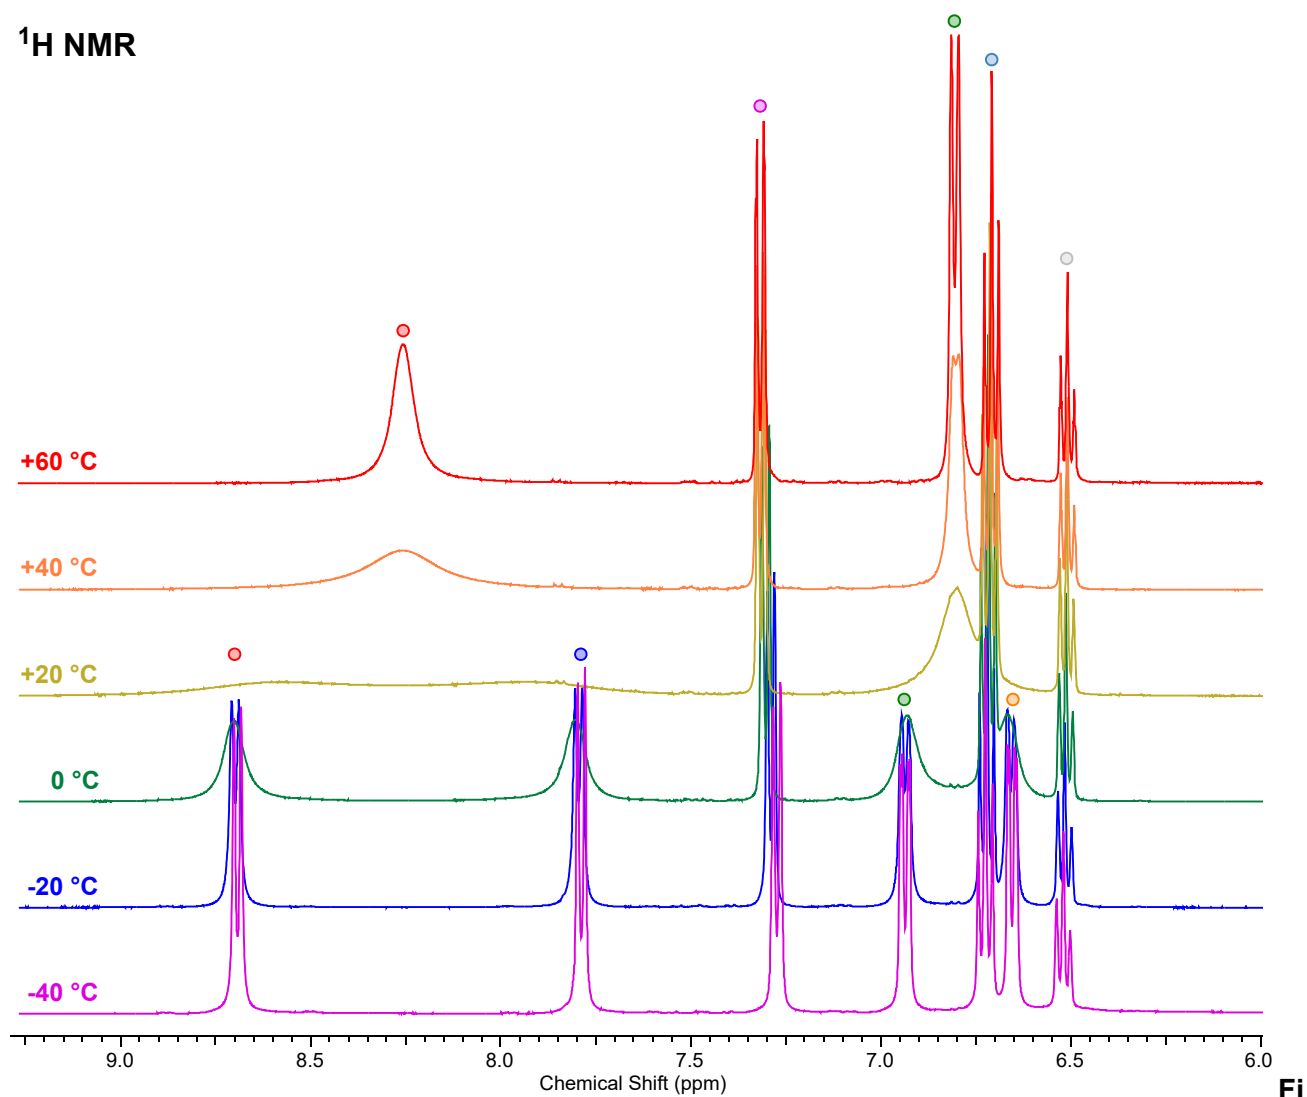

**Figure S2:** Stacked  $^1\text{H}$  NMR spectra (aromatic region) of **1d** at variable temperatures in  $\text{THF-d}_8$ .

## $^7\text{Li}$ NMR

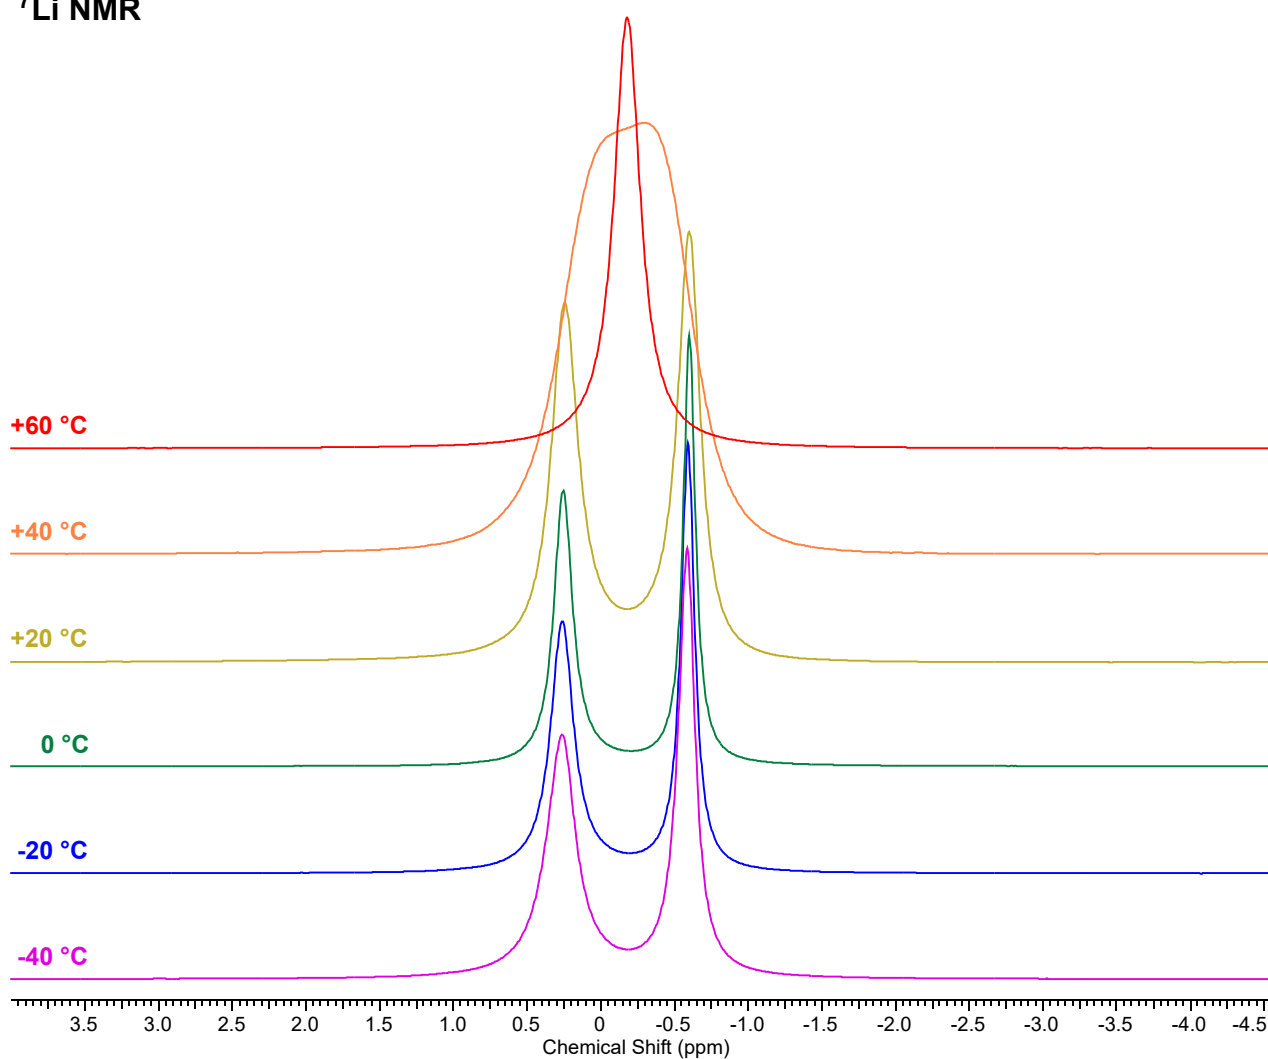

**Figure S3:** Stacked  $^7\text{Li}$  NMR spectrum of **1d** at variable temperatures in  $\text{THF-d}_8$ .

## Catalytic Reactions

### Cyclotrimerisation of Diphenylacetylene

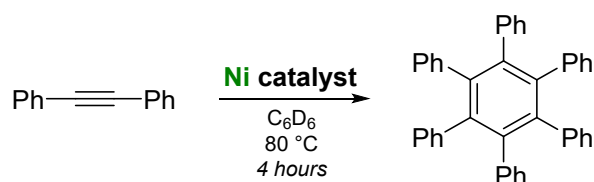

Diphenylacetylene (17.8 mg, 0.1 mmol) and hexamethylbenzene (1.6 mg, 0.01 mmol, internal standard) were dissolved in  $\text{C}_6\text{D}_6$  (0.6 mL) in a J. Young's NMR tube, then the corresponding nickel catalyst was added (5 mol% for dinickel compounds, 10 mol% for mononickel compounds). A  $^1\text{H}$  NMR spectrum was recorded to establish the ratio of  $\text{Ph-C}\equiv\text{C-Ph}$  to the internal standard. The NMR tube was then heated for 4 hours at  $80\text{ }^\circ\text{C}$ . A  $^1\text{H}$  NMR spectrum was recorded to measure the conversion of  $\text{Ph-C}\equiv\text{C-Ph}$  against the internal standard. Since hexaphenylbenzene is poorly soluble in  $\text{C}_6\text{D}_6$ , it was not possible to directly measure the spectroscopic yield of the cyclotrimerization product. A representative example of the NMR spectra when using **2a** as the catalyst is shown in Figure S4.



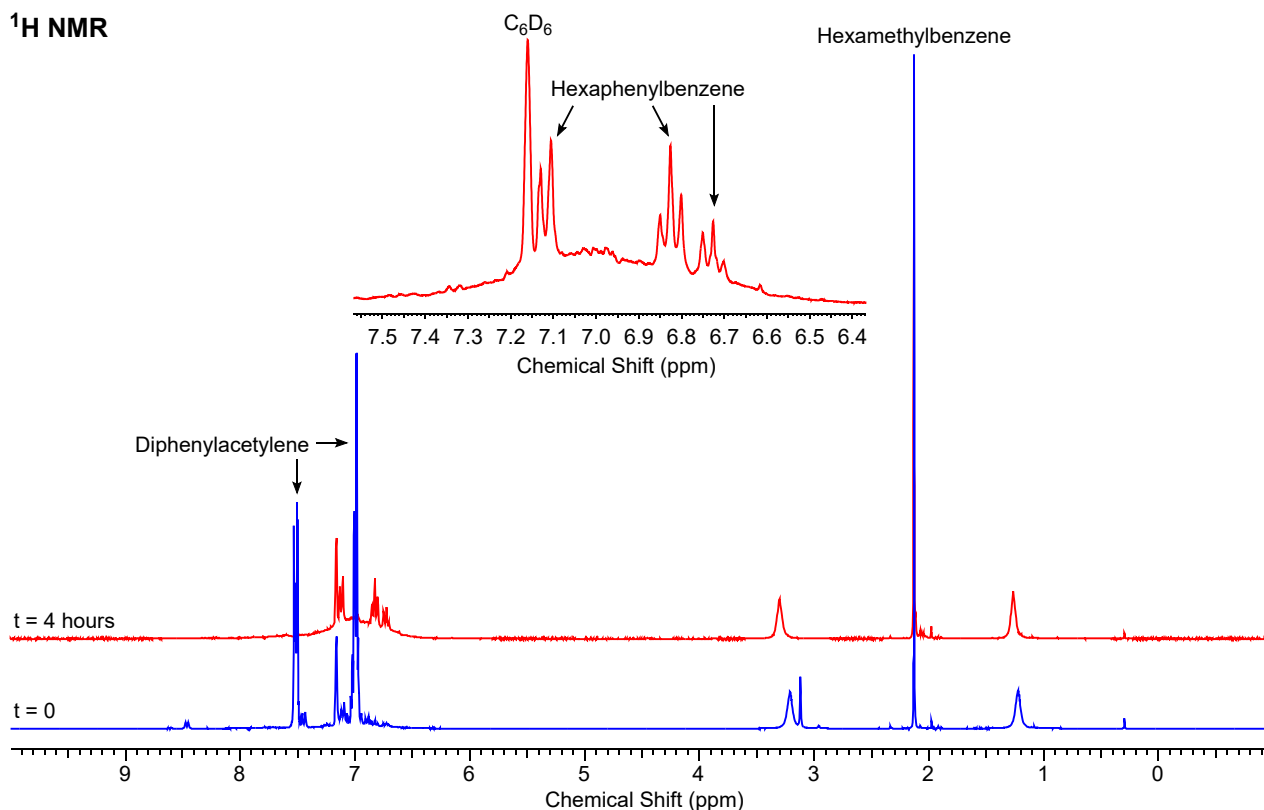

**Figure S4:** Stacked <sup>1</sup>H NMR spectra showing the cyclotrimerisation of diphenylacetylene catalysed by **2a**.

Comparison of different nickel catalysts illustrates that mononickelate derivatives bearing electron-rich substituents (**2a** and **2c**) show the best catalytic activity (Table S1) for the cyclotrimerisation of diphenylacetylene. No cyclotrimerisation is observed in the absence of a nickel catalyst.

| Entry | Nickel Catalyst                                                                                                                                             | Conversion (%)  |
|-------|-------------------------------------------------------------------------------------------------------------------------------------------------------------|-----------------|
| 1     | [(COD)Ni] <sub>2</sub> {PhCCPh} (5 mol%)                                                                                                                    | 38              |
| 2     | Ni <sub>2</sub> COT <sub>2</sub> (5 mol%)                                                                                                                   | 41              |
| 3     | Li <sub>4</sub> (Et <sub>2</sub> O) <sub>4</sub> Ph <sub>4</sub> Ni <sub>2</sub> {PhCCPh}, <b>1a</b> (5 mol%)                                               | 74              |
| 4     | Na <sub>4</sub> (THF) <sub>6</sub> Ph <sub>4</sub> Ni <sub>2</sub> {PhCCPh}, <b>1b</b> (5 mol%)                                                             | 73              |
| 5     | K <sub>4</sub> (THF) <sub>4</sub> Ph <sub>4</sub> Ni <sub>2</sub> {PhCCPh}, <b>1c</b> (5 mol%)                                                              | 78 <sup>a</sup> |
| 6     | Li <sub>4</sub> (Et <sub>2</sub> O) <sub>4</sub> (4- <i>t</i> -Bu-C <sub>6</sub> H <sub>4</sub> ) <sub>4</sub> Ni <sub>2</sub> {PhCCPh}, <b>1d</b> (5 mol%) | 85              |
| 7     | Li <sub>4</sub> (Et <sub>2</sub> O) <sub>4</sub> (CCPh) <sub>4</sub> Ni <sub>2</sub> {PhCCPh}, <b>V</b> (5 mol%)                                            | <5              |
| 8     | Li <sub>2</sub> (THF) <sub>2</sub> ( <i>o</i> -Tol) <sub>2</sub> Ni{PhCCPh}, <b>2a</b> (10 mol%)                                                            | >95             |
| 9     | Li <sub>2</sub> (Et <sub>2</sub> O) <sub>2</sub> (1-Naph) <sub>2</sub> Ni{PhCCPh}, <b>2b</b> (10 mol%)                                                      | 71              |
| 10    | Li <sub>2</sub> (Et <sub>2</sub> O) <sub>2</sub> (2,6-Me <sub>2</sub> -C <sub>6</sub> H <sub>3</sub> ) <sub>2</sub> Ni{PhCCPh}, <b>2c</b> (10 mol%)         | >95             |
| 11    | Li <sub>2</sub> (THF) <sub>4</sub> (2,2'-biphenyl)Ni{PhCCPh}, <b>2d</b> (10 mol%)                                                                           | 26 <sup>a</sup> |
| 12    | No catalyst                                                                                                                                                 | 0               |
| 13    | PhLi(THF) (20 mol%)                                                                                                                                         | 0               |

**Table S1:** Cyclotrimerisation of diphenylacetylene catalysed by different nickel complexes. <sup>a</sup> Reaction performed in THF-d<sub>8</sub>.

## Cyclotrimerisation of Phenylacetylene

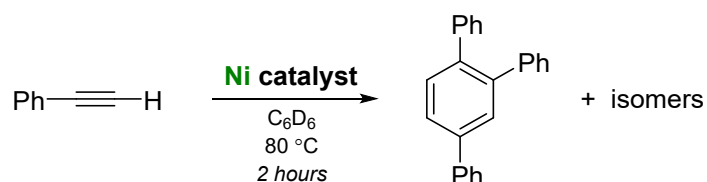

Whilst  $\text{Li}_4(\text{Et}_2\text{O})_4(\text{C}\equiv\text{C}-\text{Ph})_4\text{Ni}_2\{\mu_2:\eta^2,\eta^2-\text{Ph}-\text{C}\equiv\text{C}-\text{Ph}\}$  (**V**) is unable to catalyse the cyclotrimerisation of diphenylacetylene, it is able to catalyse the cyclotrimerisation of phenylacetylene. Using 2.5 mol% of **V**, full conversion (>95%) of phenylacetylene is observed after 2 hours of heating at 80 °C to primarily give 1,2,4-triphenylbenzene with trace amounts of other species (1,3,5-triphenylbenzene or cyclooctatetraenes). Using  $\text{Ni}_2\text{COT}_2$  (2.5 mol%) as the catalyst, the conversion of phenylacetylene after 2 hours of heating at 80 °C is 74%. Compound **V** can also be prepared *in situ* by treating  $\text{Li}_4(\text{Et}_2\text{O})_4\text{Ph}_4\text{Ni}_2\{\mu_2:\eta^2,\eta^2-\text{Ph}-\text{C}\equiv\text{C}-\text{Ph}\}$  (**1a**) with 4 equivalents of phenylacetylene (Figure S5).

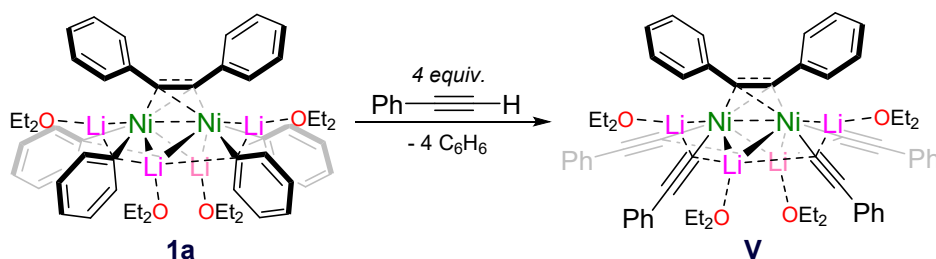

## <sup>1</sup>H NMR

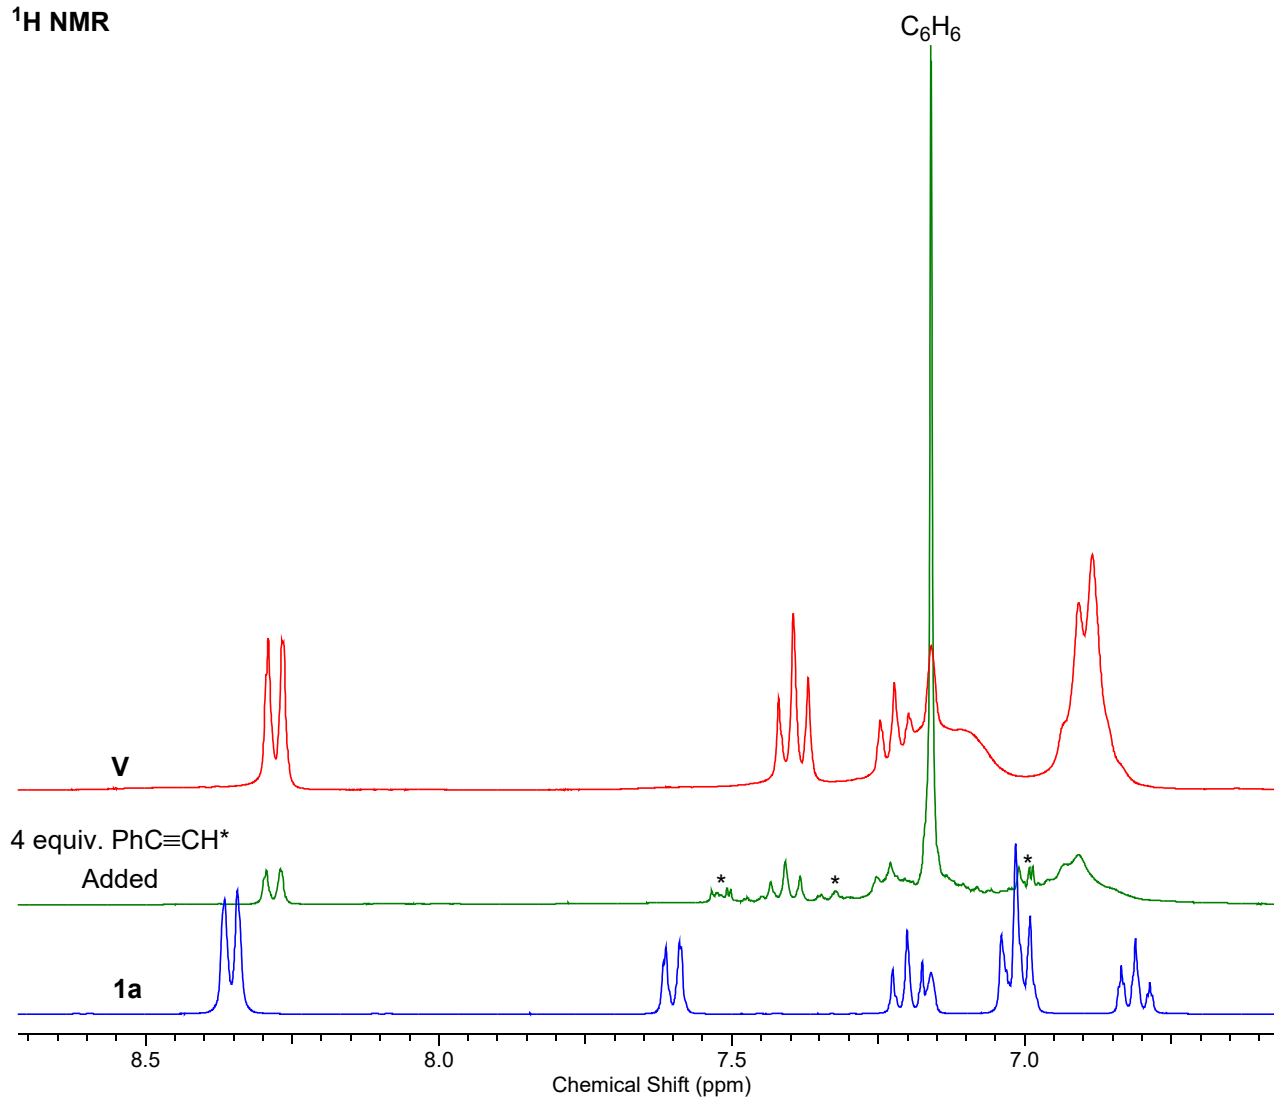

**Figure S5:** Stacked <sup>1</sup>H NMR spectra (aromatic region) showing the conversion of  $\text{Li}_4(\text{Et}_2\text{O})_4\text{Ph}_4\text{Ni}_2\{\mu_2\text{:}\eta^2,\eta^2\text{-Ph-C}\equiv\text{C-Ph}\}$  (**1a**) into  $\text{Li}_4(\text{Et}_2\text{O})_4(\text{C}\equiv\text{C-Ph})_4\text{Ni}_2\{\mu_2\text{:}\eta^2,\eta^2\text{-Ph-C}\equiv\text{C-Ph}\}$  (**V**) upon treatment with four equivalents of phenylacetylene.

### Insertion of Diphenylacetylene into Biphenylene

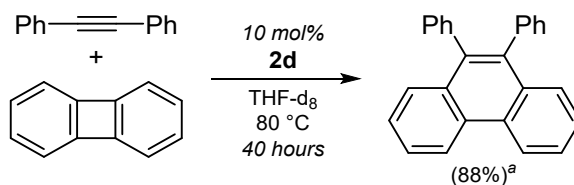

Biphenylene (15.2 mg, 0.1 mmol) and hexamethylbenzene (1.6 mg, 0.01 mmol) were dissolved in  $\text{THF-d}_8$  (0.6 mL) in a J. Young's NMR tube (Figure S6, blue trace). Diphenylacetylene (17.8 mg, 0.1 mmol) was added (Figure S6 green trace), followed by  $\text{Li}_2(\text{THF})_4(2,2'\text{-biphenyl})\text{Ni}\{\eta^2\text{-Ph-C}\equiv\text{C-Ph}\}$  (**2d**) (6.9 mg, 0.01 mmol) (Figure S6, red trace). The NMR tube was heated to 80 °C and periodically monitored by <sup>1</sup>H NMR spectroscopy. After 40 hours, a spectroscopic yield of 9,10-diphenylphenanthrene (88%) was observed by comparison with the internal standard (Figure S6, yellow trace).

## <sup>1</sup>H NMR

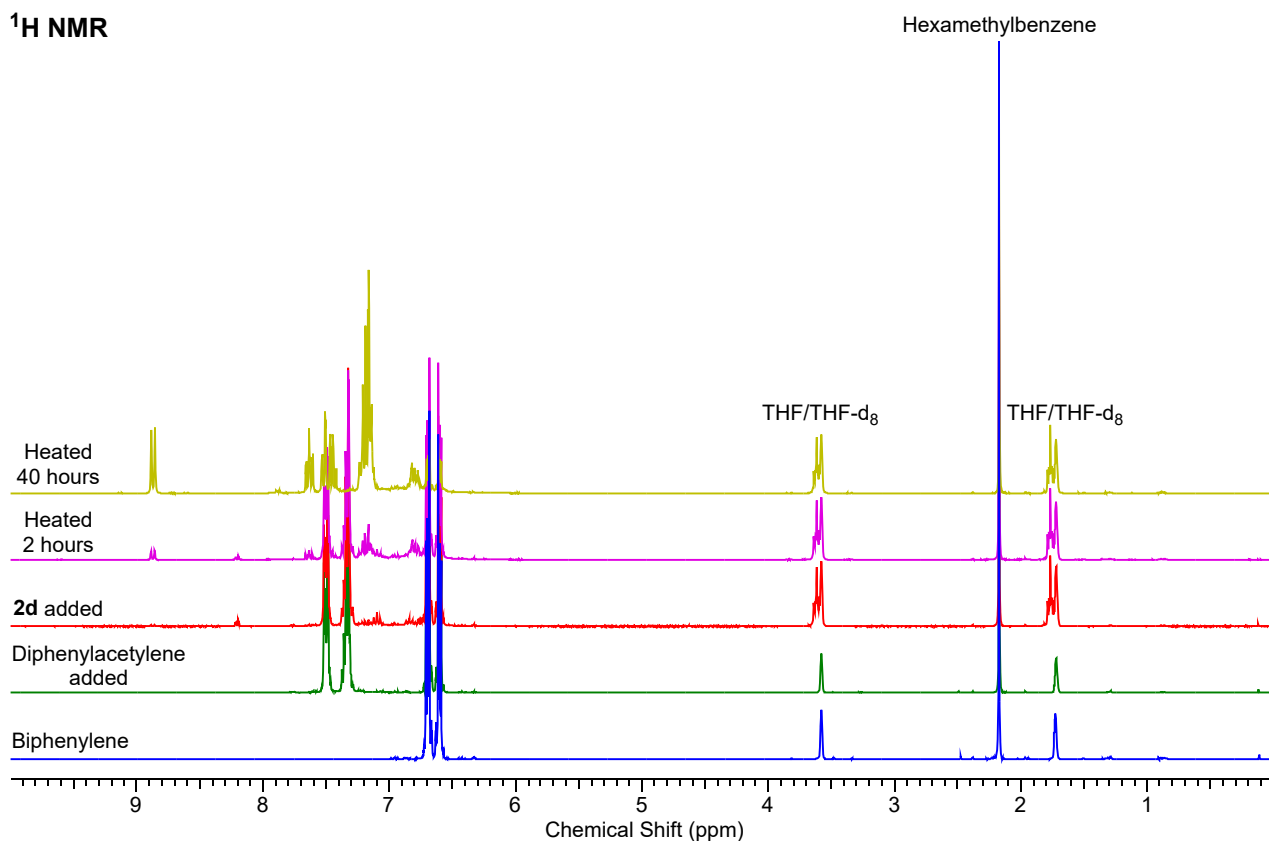

**Figure S6:** Stacked <sup>1</sup>H NMR spectra showing the insertion of diphenylacetylene into biphenylene catalysed by  $\text{Li}_2(\text{THF})_4(2,2'\text{-biphenyl})\text{Ni}\{\eta^2\text{-Ph-C}\equiv\text{C-Ph}\}$  (**2d**).

## X-ray Crystallography

The crystal structures of all novel compounds have been deposited into the Cambridge Crystallographic Data Centre (CCDC) and have been assigned the following numbers: **1a** – 2221333; **1b** – 2221334; **1d** – 2221335; **1e** – 2221336; **1f** – 2221337; **2c** – 2221338; **2d** – 2221339. Selected crystallographic and refinement parameters are presented below (**Tables S2–4**). In all cases, crystals immersed in an inert parabar oil were mounted at ambient conditions and transferred into the nitrogen stream (100 or 173 K). Perfluorinated oil should be avoided for the alkali-metal nickelates.

All measurements were made on a *RIGAKU Synergy S* area-detector diffractometer using mirror optics monochromated Cu *K* $\alpha$  radiation ( $\lambda = 1.54184 \text{ \AA}$ ). Data reduction was performed using the *CrysAlisPro* program.<sup>7</sup> The intensities were corrected for Lorentz and polarization effects, and an absorption correction based on the Gaussian method using SCALE3 ABSPACK in *CrysAlisPro* was applied. The structure was solved by direct methods or intrinsic phasing using *SHELXT*,<sup>8</sup> which revealed the positions of all non-hydrogen atoms of the compounds. All non-hydrogen atoms were refined anisotropically. H-atoms were assigned in geometrically calculated positions and refined using a riding model where each H-atom was assigned a fixed isotropic displacement parameter with a value equal to 1.2U<sub>eq</sub> of its parent atom (1.5U<sub>eq</sub> for methyl groups). Refinement of the structure was carried out on  $F^2$  using full-matrix least-squares procedures, which minimized the function  $\sum w(F_o^2 - F_c^2)^2$ . The

weighting scheme was based on counting statistics and included a factor to downweight the intense reflections. All calculations were performed using the *SHELXL-2014/7*<sup>9</sup> program in OLEX2.<sup>10</sup>

For **1a**, a disorder model was included for parts of the structure where the occupancies of each disorder component were refined through the use of a free variable. The sum of equivalent components was constrained to 1 i.e. 100%.

For **1b**, a disorder model was used for parts of the structure where the occupancies of each disorder component was refined through the use of a free variable. The sum of equivalent components was constrained to 1, i.e. 100%. Four component twins could be found on the frames, therefore the structure was refined against the hkl for the isolated 1<sup>st</sup>/major component.

For **1d**, areas containing one disordered Et<sub>2</sub>O solvent molecule was found where a satisfactory solvent model could not be achieved, therefore, a solvent mask was used to include the contribution of electron density found in void areas into the calculated structure factor.

For **1e**, a disorder model was used for parts of the structure where the occupancies of each disorder component was refined through the use of a free variable. The sum of equivalent components was constrained to 1, i.e. 100%.

For **1f**, a disorder model was used for parts of the structure where the occupancies of each disorder component was refined through the use of a free variable. The sum of equivalent components was constrained to 1, i.e. 100%. Areas containing disorder solvents were found where a satisfactory solvent model could not be achieved, therefore, a solvent mask was used to include the contribution of electron density found in void areas into the calculated structure factor.

| Compound                                    | <b>1a</b>                                                                      | <b>1b</b>                                                                      | <b>1d</b>                                                                       |
|---------------------------------------------|--------------------------------------------------------------------------------|--------------------------------------------------------------------------------|---------------------------------------------------------------------------------|
| CCDC number                                 | 2221333                                                                        | 2221334                                                                        | 2221335                                                                         |
| Empirical formula                           | C <sub>54</sub> H <sub>70</sub> Li <sub>4</sub> Ni <sub>2</sub> O <sub>4</sub> | C <sub>62</sub> H <sub>78</sub> Na <sub>4</sub> Ni <sub>2</sub> O <sub>6</sub> | C <sub>70</sub> H <sub>102</sub> Li <sub>4</sub> Ni <sub>2</sub> O <sub>4</sub> |
| Formula weight                              | 928.28                                                                         | 1128.62                                                                        | 1152.69                                                                         |
| Temperature/K                               | 173.01(10)                                                                     | 173.01(10)                                                                     | 173.00(10)                                                                      |
| Crystal system                              | monoclinic                                                                     | monoclinic                                                                     | orthorhombic                                                                    |
| Space group                                 | C2/c                                                                           | C2/c                                                                           | Pbca                                                                            |
| a/Å                                         | 15.10128(7)                                                                    | 20.9102(2)                                                                     | 12.16221(10)                                                                    |
| b/Å                                         | 32.53880(15)                                                                   | 17.56450(10)                                                                   | 28.5694(3)                                                                      |
| c/Å                                         | 20.86994(9)                                                                    | 16.23570(10)                                                                   | 42.1061(3)                                                                      |
| α/°                                         | 90                                                                             | 90                                                                             | 90                                                                              |
| β/°                                         | 94.9245(4)                                                                     | 90.2810(10)                                                                    | 90                                                                              |
| γ/°                                         | 90                                                                             | 90                                                                             | 90                                                                              |
| Volume/Å <sup>3</sup>                       | 10217.16(8)                                                                    | 5962.93(8)                                                                     | 14630.5(2)                                                                      |
| Z                                           | 8                                                                              | 4                                                                              | 8                                                                               |
| ρ <sub>calc</sub> /cm <sup>3</sup>          | 1.207                                                                          | 1.257                                                                          | 1.047                                                                           |
| μ/mm <sup>-1</sup>                          | 1.226                                                                          | 1.444                                                                          | 0.936                                                                           |
| F(000)                                      | 3952                                                                           | 2392                                                                           | 4976                                                                            |
| Crystal size/mm <sup>3</sup>                | 0.224 × 0.169 × 0.094                                                          | 0.408 × 0.31 × 0.081                                                           | 0.385 × 0.305 × 0.141                                                           |
| Radiation                                   | Cu Kα (λ = 1.54184)                                                            | Cu Kα (λ = 1.54184)                                                            | Cu Kα (λ = 1.54184)                                                             |
| 2θ range for data collection/°              | 5.432 to 149.53                                                                | 6.572 to 146.532                                                               | 6.188 to 133.83                                                                 |
| Index ranges                                | -18 ≤ h ≤ 18, -38 ≤ k ≤ 40, -26 ≤ l ≤ 25                                       | -25 ≤ h ≤ 23, -21 ≤ k ≤ 21, -20 ≤ l ≤ 20                                       | -11 ≤ h ≤ 14, -34 ≤ k ≤ 34, -50 ≤ l ≤ 50                                        |
| Reflections collected                       | 102249                                                                         | 57329                                                                          | 133411                                                                          |
| Independent reflections                     | 10477 [R <sub>int</sub> = 0.0327, R <sub>sigma</sub> = 0.0157]                 | 5979 [R <sub>int</sub> = 0.0402, R <sub>sigma</sub> = 0.0176]                  | 13013 [R <sub>int</sub> = 0.0576, R <sub>sigma</sub> = 0.0228]                  |
| Data/restraints/parameters                  | 10477/54/729                                                                   | 5979/264/549                                                                   | 13013/6/741                                                                     |
| Goodness-of-fit on F <sup>2</sup>           | 1.016                                                                          | 1.059                                                                          | 1.069                                                                           |
| Final R indexes [I ≥ 2σ(I)]                 | R <sub>1</sub> = 0.0343, wR <sub>2</sub> = 0.0941                              | R <sub>1</sub> = 0.0665, wR <sub>2</sub> = 0.2015                              | R <sub>1</sub> = 0.0524, wR <sub>2</sub> = 0.1352                               |
| Final R indexes [all data]                  | R <sub>1</sub> = 0.0360, wR <sub>2</sub> = 0.0954                              | R <sub>1</sub> = 0.0725, wR <sub>2</sub> = 0.2093                              | R <sub>1</sub> = 0.0566, wR <sub>2</sub> = 0.1377                               |
| Largest diff. peak/hole / e Å <sup>-3</sup> | 0.54/-0.25                                                                     | 0.41/-0.47                                                                     | 0.68/-0.40                                                                      |

**Table S2:** Crystal data and structure refinement details for compounds **1a**, **1b** and **1d**.

| Compound                                    | <b>1e</b>                                                                      | <b>1f</b>                                                                      |
|---------------------------------------------|--------------------------------------------------------------------------------|--------------------------------------------------------------------------------|
| CCDC number                                 | 2221336                                                                        | 2221337                                                                        |
| Empirical formula                           | C <sub>58</sub> H <sub>77</sub> Li <sub>4</sub> Ni <sub>2</sub> O <sub>4</sub> | C <sub>78</sub> H <sub>86</sub> Li <sub>4</sub> Ni <sub>2</sub> O <sub>6</sub> |
| Formula weight                              | 983.37                                                                         | 1264.64                                                                        |
| Temperature/K                               | 173.00(10)                                                                     | 173.00(10)                                                                     |
| Crystal system                              | monoclinic                                                                     | monoclinic                                                                     |
| Space group                                 | P2 <sub>1</sub> /n                                                             | P2/n                                                                           |
| a/Å                                         | 12.37091(7)                                                                    | 24.15833(13)                                                                   |
| b/Å                                         | 19.44400(10)                                                                   | 11.80124(6)                                                                    |
| c/Å                                         | 23.57916(13)                                                                   | 25.58438(14)                                                                   |
| α/°                                         | 90                                                                             | 90                                                                             |
| β/°                                         | 101.8680(5)                                                                    | 106.3646(6)                                                                    |
| γ/°                                         | 90                                                                             | 90                                                                             |
| Volume/Å <sup>3</sup>                       | 5550.49(5)                                                                     | 6998.56(7)                                                                     |
| Z                                           | 4                                                                              | 4                                                                              |
| ρ <sub>calc</sub> /cm <sup>3</sup>          | 1.177                                                                          | 1.2                                                                            |
| μ/mm <sup>-1</sup>                          | 1.155                                                                          | 1.054                                                                          |
| F(000)                                      | 2100                                                                           | 2680                                                                           |
| Crystal size/mm <sup>3</sup>                | 0.233 × 0.171 × 0.103                                                          | 0.26 × 0.13 × 0.11                                                             |
| Radiation                                   | Cu Kα (λ = 1.54184)                                                            | Cu Kα (λ = 1.54184)                                                            |
| 2θ range for data collection/°              | 5.944 to 136.48                                                                | 4.444 to 140.148                                                               |
| Index ranges                                | -14 ≤ h ≤ 14, -23 ≤ k ≤ 23, -28 ≤ l ≤ 28                                       | -28 ≤ h ≤ 29, -14 ≤ k ≤ 14, -31 ≤ l ≤ 31                                       |
| Reflections collected                       | 107510                                                                         | 133747                                                                         |
| Independent reflections                     | 10163 [R <sub>int</sub> = 0.0380, R <sub>sigma</sub> = 0.0187]                 | 13317 [R <sub>int</sub> = 0.0498, R <sub>sigma</sub> = 0.0217]                 |
| Data/restraints/parameters                  | 10163/216/741                                                                  | 13317/55/923                                                                   |
| Goodness-of-fit on F <sup>2</sup>           | 1.032                                                                          | 1.063                                                                          |
| Final R indexes [I >= 2σ (I)]               | R <sub>1</sub> = 0.0411, wR <sub>2</sub> = 0.1172                              | R <sub>1</sub> = 0.0692, wR <sub>2</sub> = 0.1850                              |
| Final R indexes [all data]                  | R <sub>1</sub> = 0.0441, wR <sub>2</sub> = 0.1201                              | R <sub>1</sub> = 0.0708, wR <sub>2</sub> = 0.1863                              |
| Largest diff. peak/hole / e Å <sup>-3</sup> | 0.61/-0.38                                                                     | 1.50/-0.60                                                                     |

**Table S3:** Crystal data and structure refinement details for compounds **1e** and **1f**.

| Compound                                    | <b>2c</b>                                                        | <b>2d</b>                                                        |
|---------------------------------------------|------------------------------------------------------------------|------------------------------------------------------------------|
| CCDC number                                 | 2221338                                                          | 2221339                                                          |
| Empirical formula                           | C <sub>38</sub> H <sub>48</sub> Li <sub>2</sub> NiO <sub>2</sub> | C <sub>42</sub> H <sub>50</sub> Li <sub>2</sub> NiO <sub>4</sub> |
| Formula weight                              | 609.35                                                           | 691.41                                                           |
| Temperature/K                               | 173.00(10)                                                       | 173.00(10)                                                       |
| Crystal system                              | monoclinic                                                       | orthorhombic                                                     |
| Space group                                 | P2 <sub>1</sub> /c                                               | Pbca                                                             |
| a/Å                                         | 17.30135(14)                                                     | 15.49117(5)                                                      |
| b/Å                                         | 14.29224(10)                                                     | 19.31164(7)                                                      |
| c/Å                                         | 15.04570(13)                                                     | 24.55861(9)                                                      |
| α/°                                         | 90                                                               | 90                                                               |
| β/°                                         | 115.1129(10)                                                     | 90                                                               |
| γ/°                                         | 90                                                               | 90                                                               |
| Volume/Å <sup>3</sup>                       | 3368.74(5)                                                       | 7346.96(5)                                                       |
| Z                                           | 4                                                                | 8                                                                |
| ρ <sub>calc</sub> /cm <sup>3</sup>          | 1.201                                                            | 1.25                                                             |
| μ/mm <sup>-1</sup>                          | 1.048                                                            | 1.067                                                            |
| F(000)                                      | 1304                                                             | 2944                                                             |
| Crystal size/mm <sup>3</sup>                | 0.336 × 0.242 × 0.176                                            | 0.508 × 0.423 × 0.186                                            |
| Radiation                                   | Cu Kα (λ = 1.54184)                                              | Cu Kα (λ = 1.54184)                                              |
| 2θ range for data collection/°              | 5.642 to 149.512                                                 | 7.2 to 149.004                                                   |
| Index ranges                                | -21 ≤ h ≤ 20, -17 ≤ k ≤ 17, -18 ≤ l ≤ 18                         | -19 ≤ h ≤ 18, -24 ≤ k ≤ 23, -27 ≤ l ≤ 30                         |
| Reflections collected                       | 67317                                                            | 72965                                                            |
| Independent reflections                     | 6899 [R <sub>int</sub> = 0.0323, R <sub>sigma</sub> = 0.0138]    | 7508 [R <sub>int</sub> = 0.0302, R <sub>sigma</sub> = 0.0125]    |
| Data/restraints/parameters                  | 6899/0/581                                                       | 7508/0/619                                                       |
| Goodness-of-fit on F <sup>2</sup>           | 1.041                                                            | 1.041                                                            |
| Final R indexes [I ≥ 2σ (I)]                | R <sub>1</sub> = 0.0300, wR <sub>2</sub> = 0.0794                | R <sub>1</sub> = 0.0395, wR <sub>2</sub> = 0.1031                |
| Final R indexes [all data]                  | R <sub>1</sub> = 0.0305, wR <sub>2</sub> = 0.0798                | R <sub>1</sub> = 0.0405, wR <sub>2</sub> = 0.1038                |
| Largest diff. peak/hole / e Å <sup>-3</sup> | 0.26/-0.28                                                       | 0.70/-0.48                                                       |

**Table S4:** Crystal data and structure refinement details for compounds **2c** and **2d**.



### Molecular Structure of $\text{Li}_2(\text{Et}_2\text{O})_4\text{Ph}_4\text{Ni}_2\{\mu_2:\eta^2,\eta^2\text{-Ph-C}\equiv\text{C-Ph}\}$ , **1a**

Top View

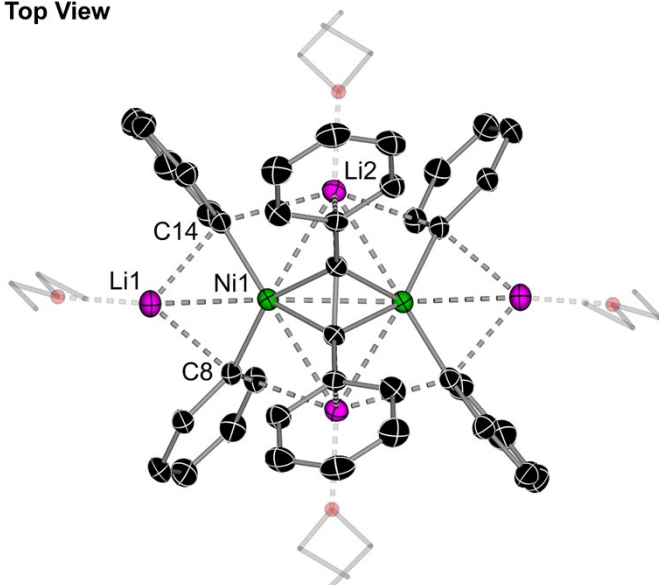

Side View

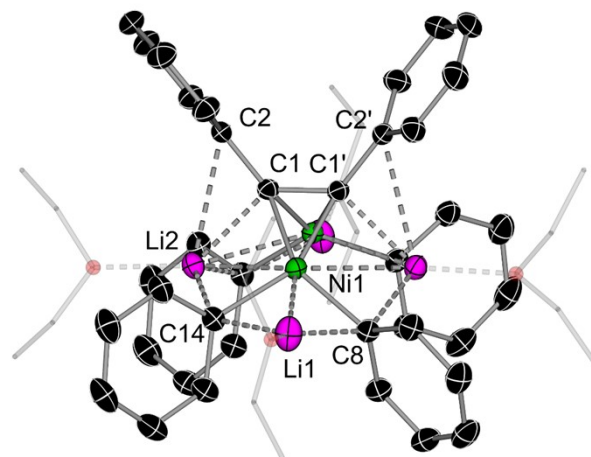

**Figure S7:** Molecular structure of **1a**. Thermal ellipsoids shown at 30% probability. Hydrogen atoms omitted and coordinated  $\text{Et}_2\text{O}$  shown as wireframes for clarity.

### Molecular Structure of $\text{Na}_2(\text{THF})_6\text{Ph}_4\text{Ni}_2\{\mu_2:\eta^2,\eta^2\text{-Ph-C}\equiv\text{C-Ph}\}$ , **1b**

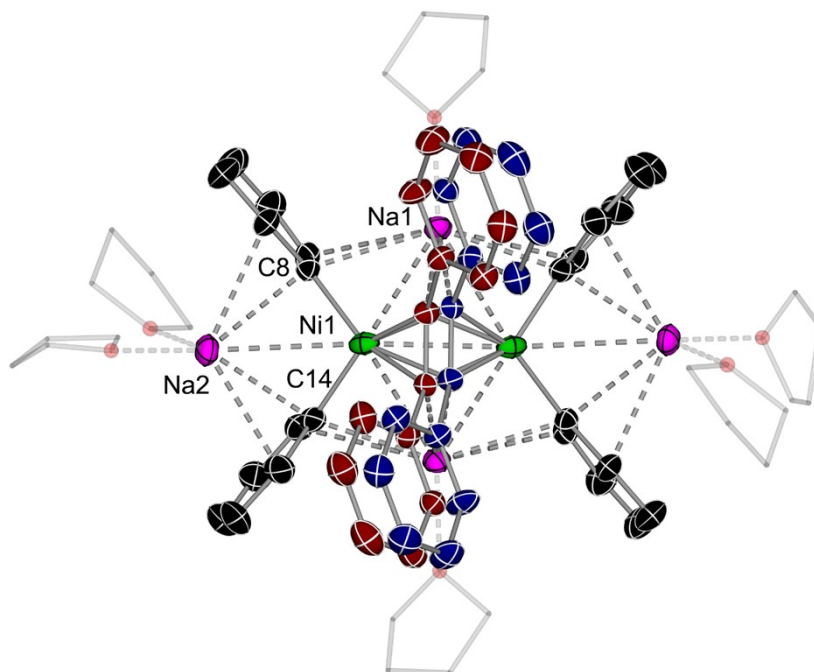

**Figure S8:** Molecular structure of **1b**. Thermal ellipsoids shown at 30% probability. Hydrogen atoms omitted and coordinated THF shown as wireframes for clarity. The coordinated  $\text{Ph-C}\equiv\text{C-Ph}$  is disordered over two positions (shown in maroon and blue).

**Molecular Structure of  $\text{Li}_2(\text{Et}_2\text{O})_4(4\text{-}^t\text{Bu-C}_6\text{H}_4)_4\text{Ni}_2\{\mu_2:\eta^2,\eta^2\text{-Ph-C}\equiv\text{C-Ph}\}$ , 1d**

Top View

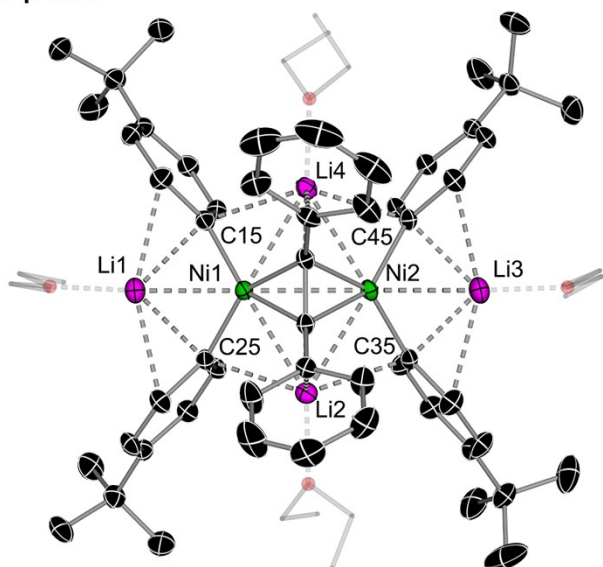

Side View

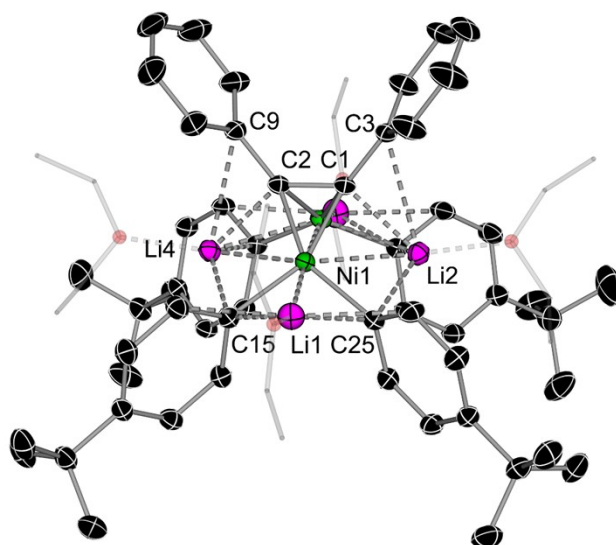

**Figure S9:** Molecular structure of **1d**. Thermal ellipsoids shown at 30% probability. Hydrogen atoms omitted and coordinated  $\text{Et}_2\text{O}$  shown as wireframes for clarity.

**Molecular Structure of  $\text{Li}_2(\text{Et}_2\text{O})_4(o\text{-Tol})_4\text{Ni}_2\{\mu_2:\eta^2,\eta^2\text{-Ph-C}\equiv\text{C-Ph}\}$ , 1e**

Top View

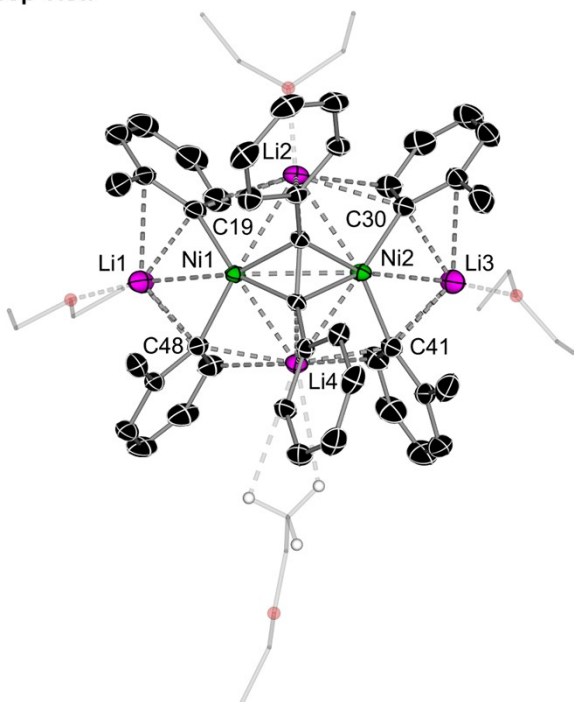

Side View

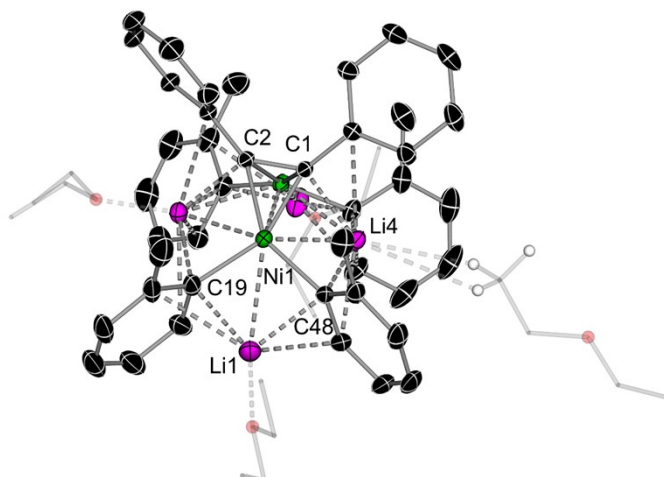

**Figure S10:** Molecular structure of **1e**. Thermal ellipsoids shown at 30% probability. Hydrogen atoms omitted and coordinated  $\text{Et}_2\text{O}$  shown as wireframes for clarity.

**Molecular Structure of  $\text{Li}_2(\text{THF})_6(1\text{-Naph})_4\text{Ni}_2\{\mu_2:\eta^2,\eta^2\text{-Ph-C}\equiv\text{C-Ph}\}$ , **1f****

Top View

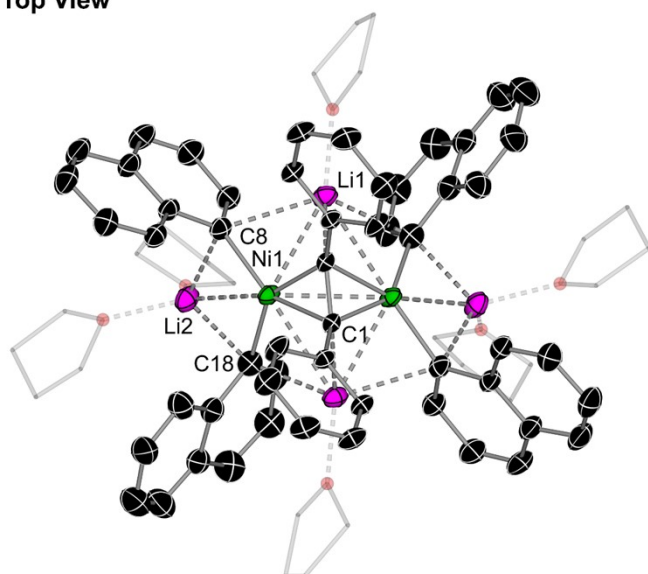

Side View

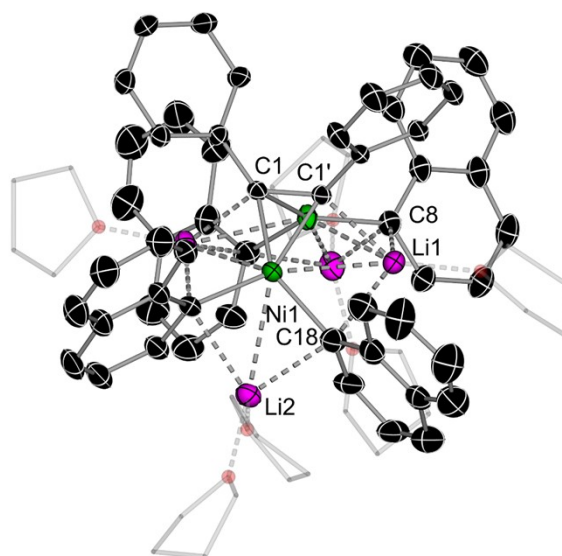

**Figure S11:** Molecular structure of **1f**. Thermal ellipsoids shown at 30% probability. Hydrogen atoms omitted and coordinated THF shown as wireframes for clarity.

**Molecular Structure of  $\text{Li}_2(\text{Et}_2\text{O})_2(2,6\text{-Me}_2\text{-C}_6\text{H}_3)_2\text{Ni}\{\eta^2\text{-Ph-C}\equiv\text{C-Ph}\}$ , **2c****

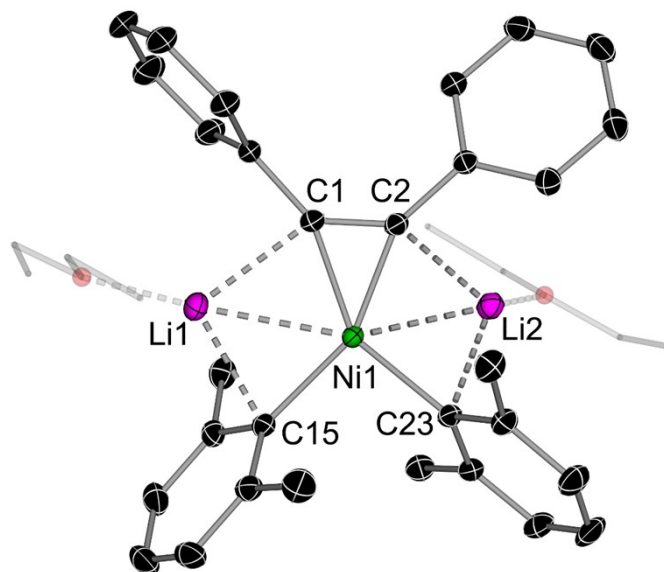

**Figure S12:** Molecular structure of **2c**. Thermal ellipsoids shown at 30% probability. Hydrogen atoms omitted and coordinated  $\text{Et}_2\text{O}$  shown as wireframes for clarity.

**Molecular Structure of  $\text{Li}_2(\text{THF})_4(2,2'\text{-biphenyl})\text{Ni}\{\eta^2\text{-Ph-C}\equiv\text{C-Ph}\}$ , **2d****

Top View

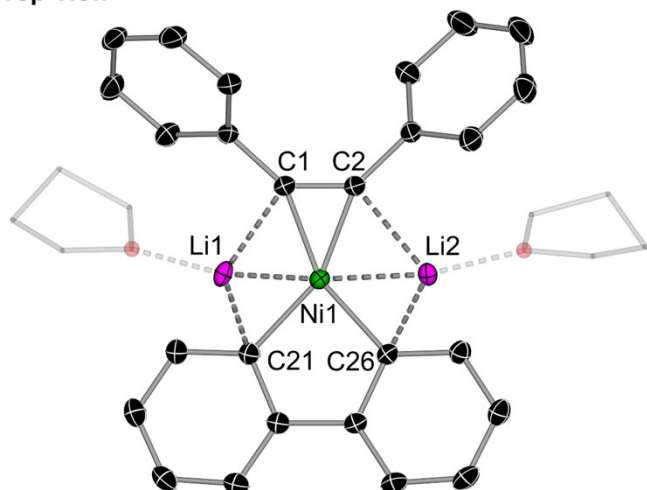

Side View

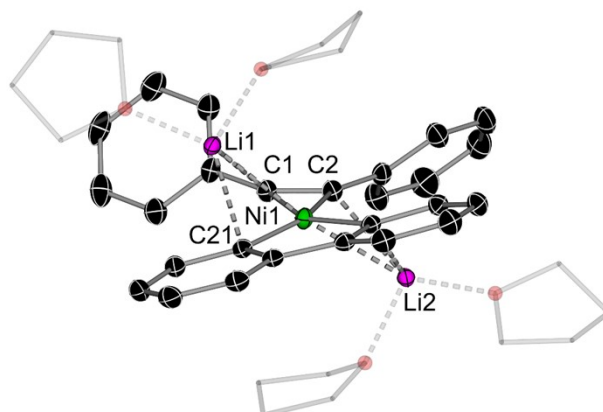

**Figure S13:** Molecular structure of **2d**. Thermal ellipsoids shown at 30% probability. Hydrogen atoms omitted and coordinated THF shown as wireframes for clarity. Two of the coordinated THF molecules have been removed from the top view for clarity.

## NMR Spectra of Reported Compounds

$^1\text{H}$  NMR

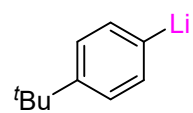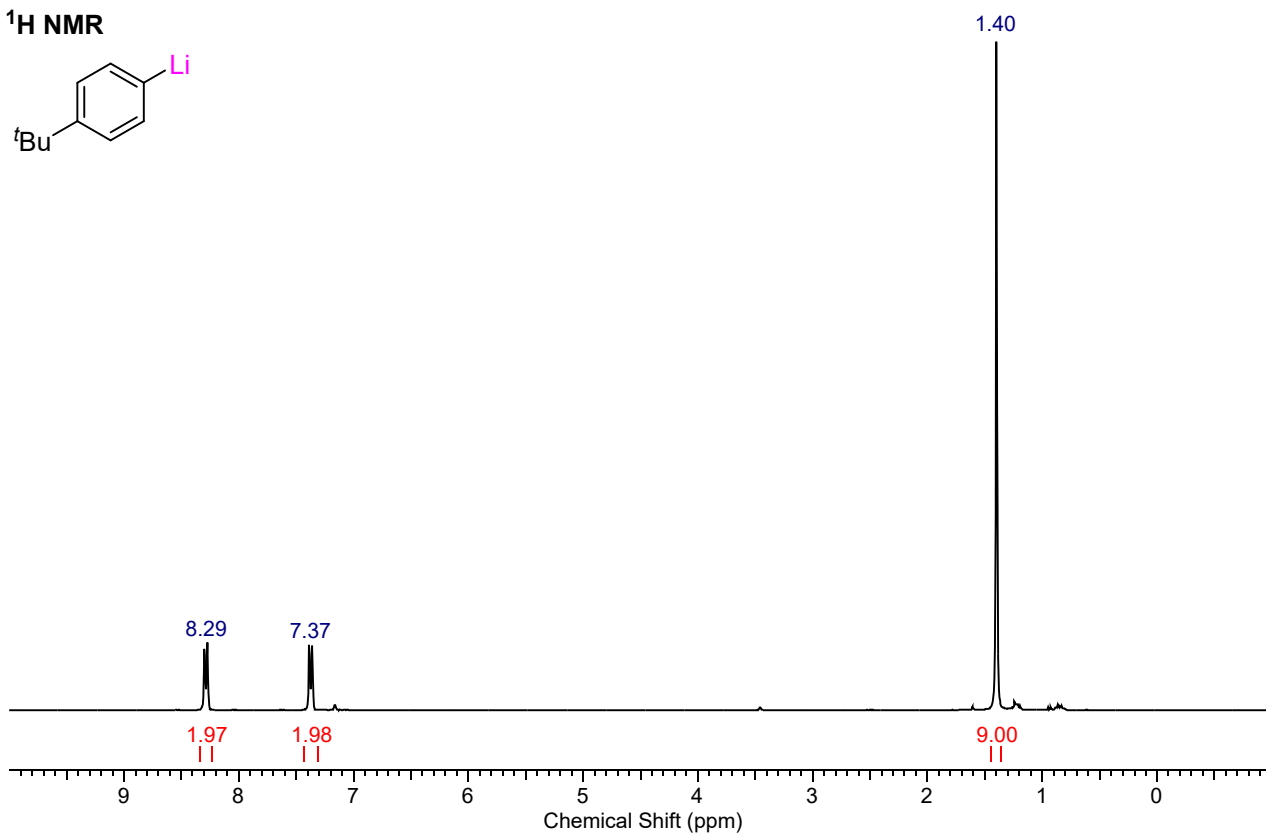

**Spectra S1:**  $^1\text{H}$  NMR spectrum of 4-*t*Bu-C<sub>6</sub>H<sub>4</sub>-Li in C<sub>6</sub>D<sub>6</sub>/THF-d<sub>8</sub>.

$^7\text{Li}$  NMR

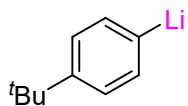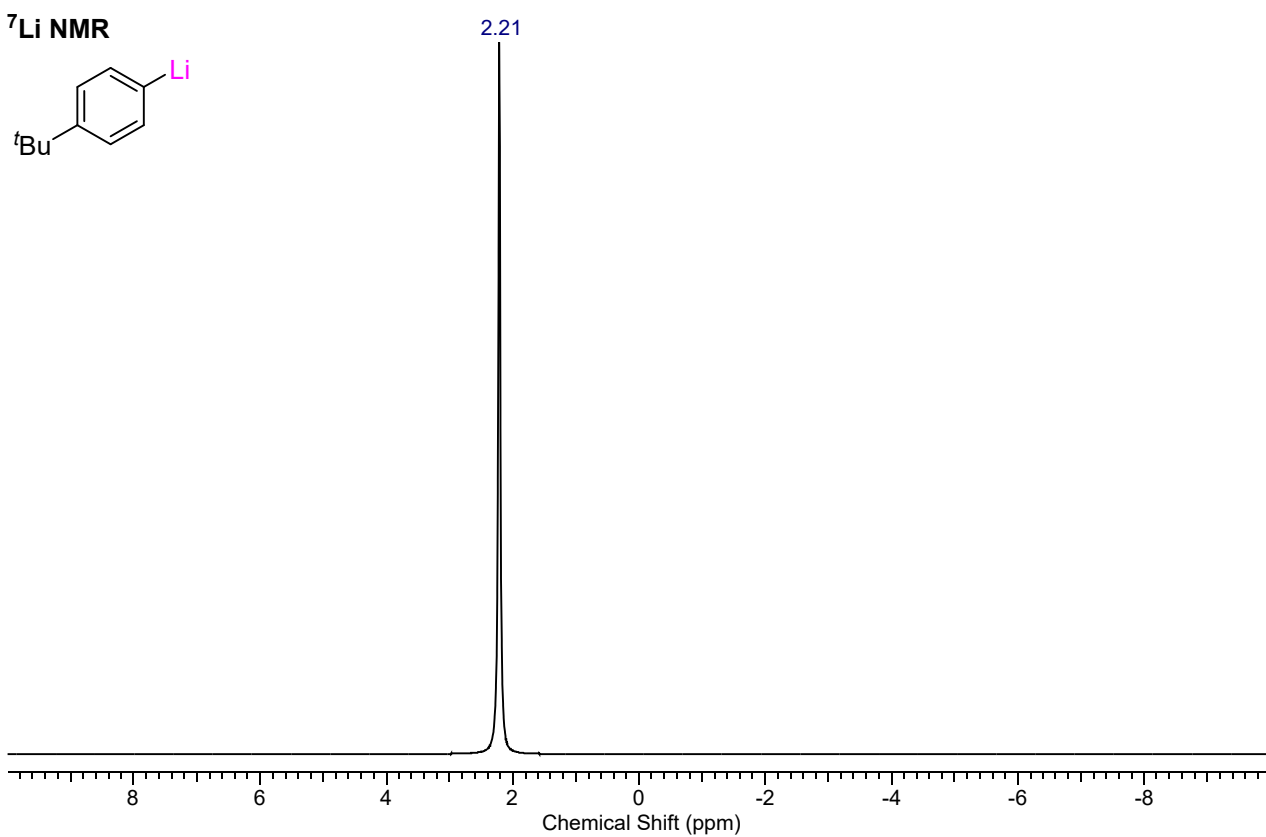

**Spectra S2:**  $^7\text{Li}$  NMR spectrum of 4-*t*Bu-C<sub>6</sub>H<sub>4</sub>-Li in C<sub>6</sub>D<sub>6</sub>/THF-d<sub>8</sub>.

$^{13}\text{C}\{^1\text{H}\}$  NMR

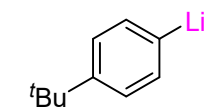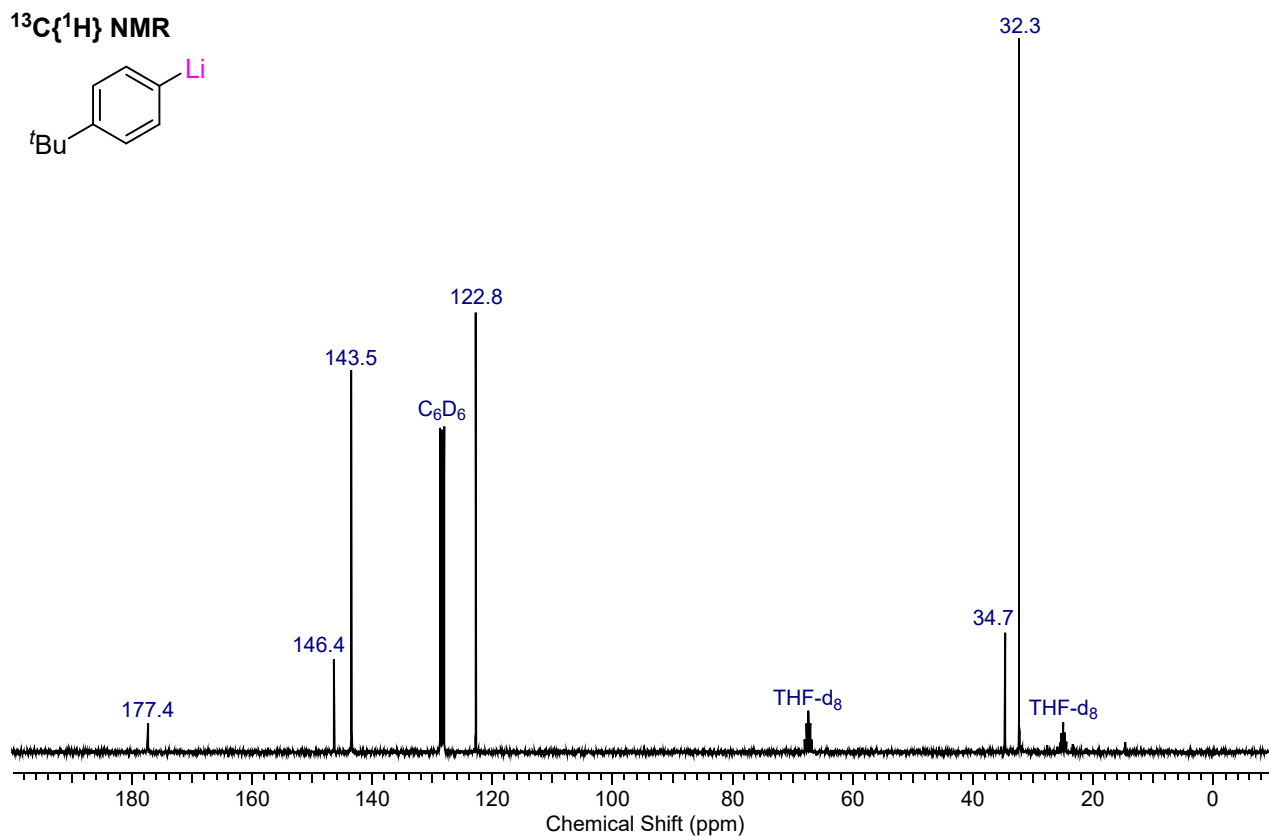

Spectra S3:  $^{13}\text{C}\{^1\text{H}\}$  NMR spectrum of 4-*t*-Bu-C<sub>6</sub>H<sub>4</sub>-Li in C<sub>6</sub>D<sub>6</sub>/THF-d<sub>8</sub>.

$^1\text{H}$  NMR

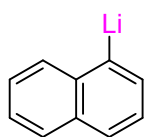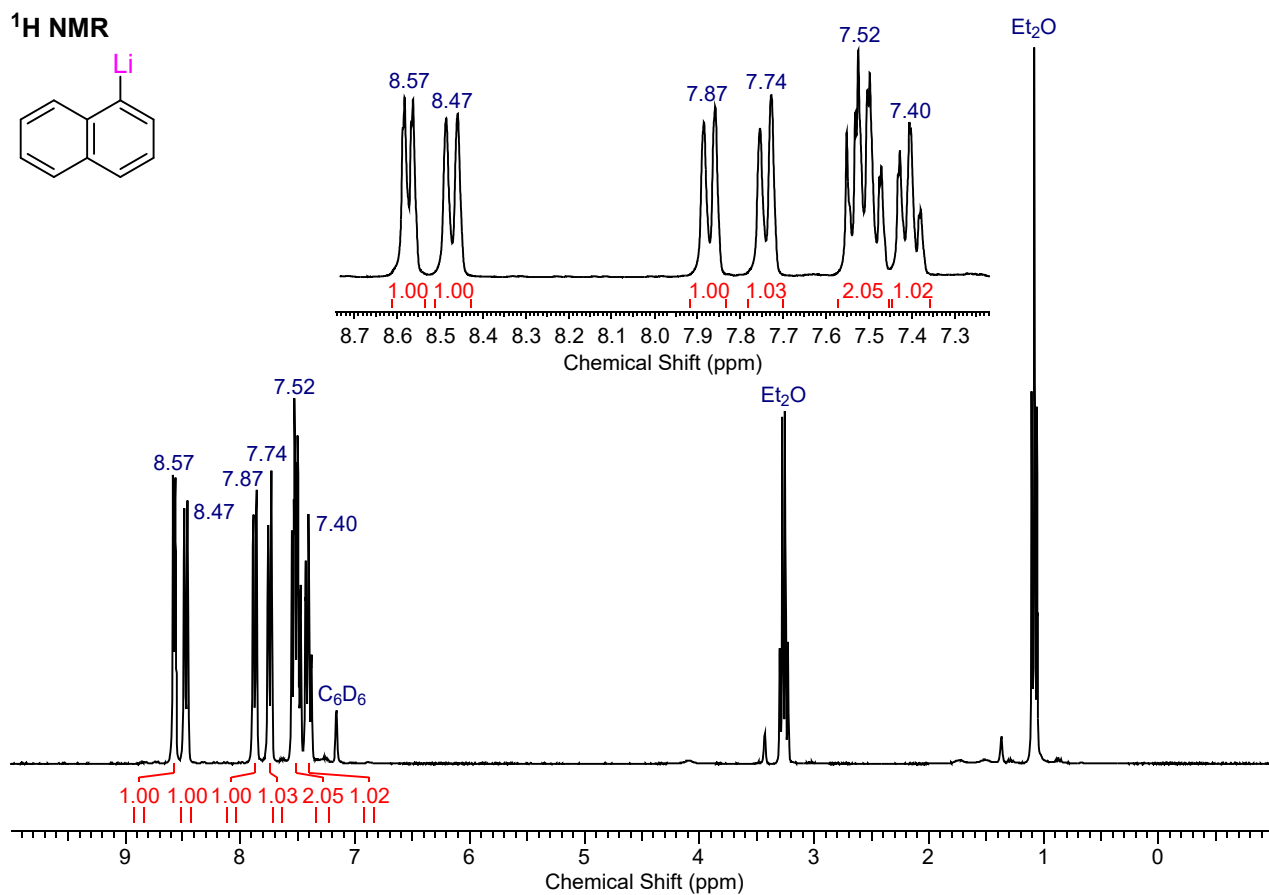

Spectra S4:  $^1\text{H}$  NMR spectrum of 1-Naph-Li in C<sub>6</sub>D<sub>6</sub>/THF-d<sub>8</sub>.

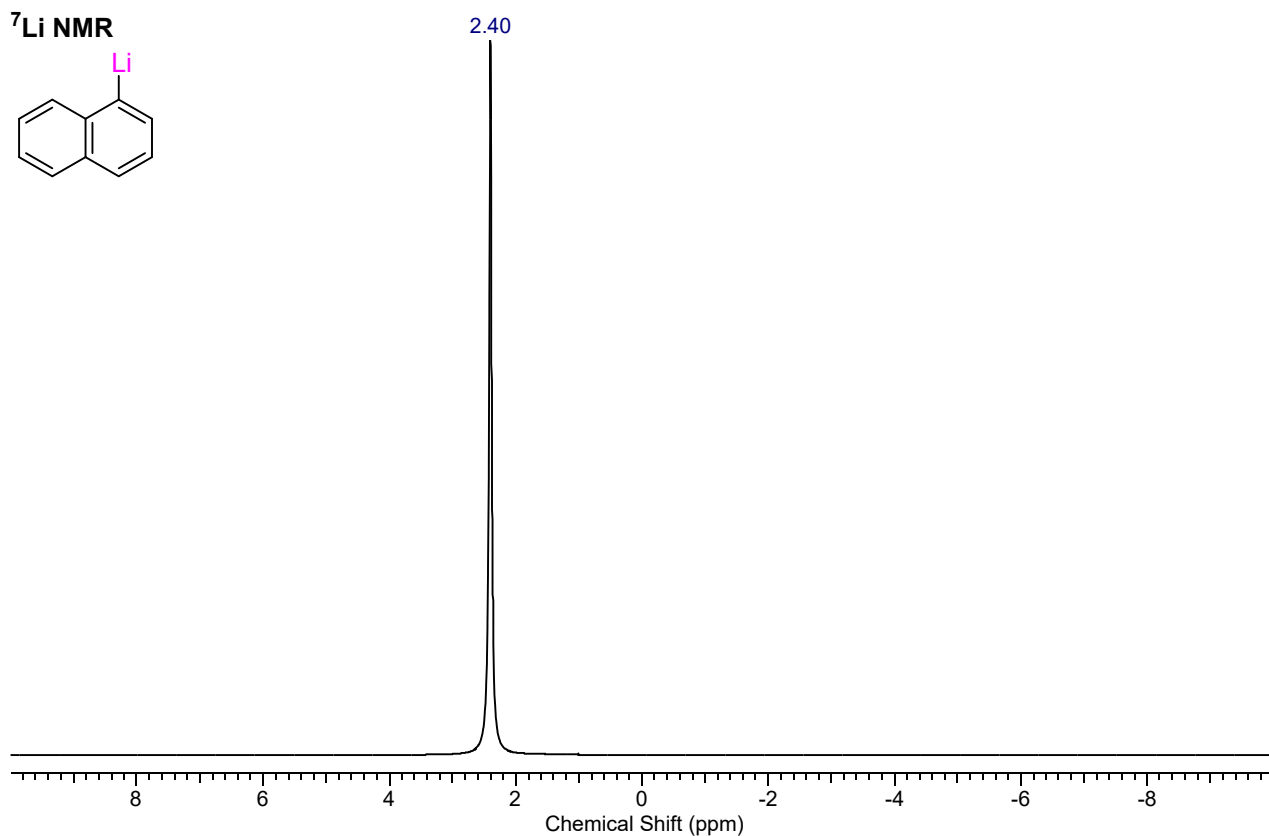

**Spectra S5:**  $^7\text{Li}$  NMR spectrum of 1-Naph-Li in  $\text{C}_6\text{D}_6/\text{THF-d}_8$ .

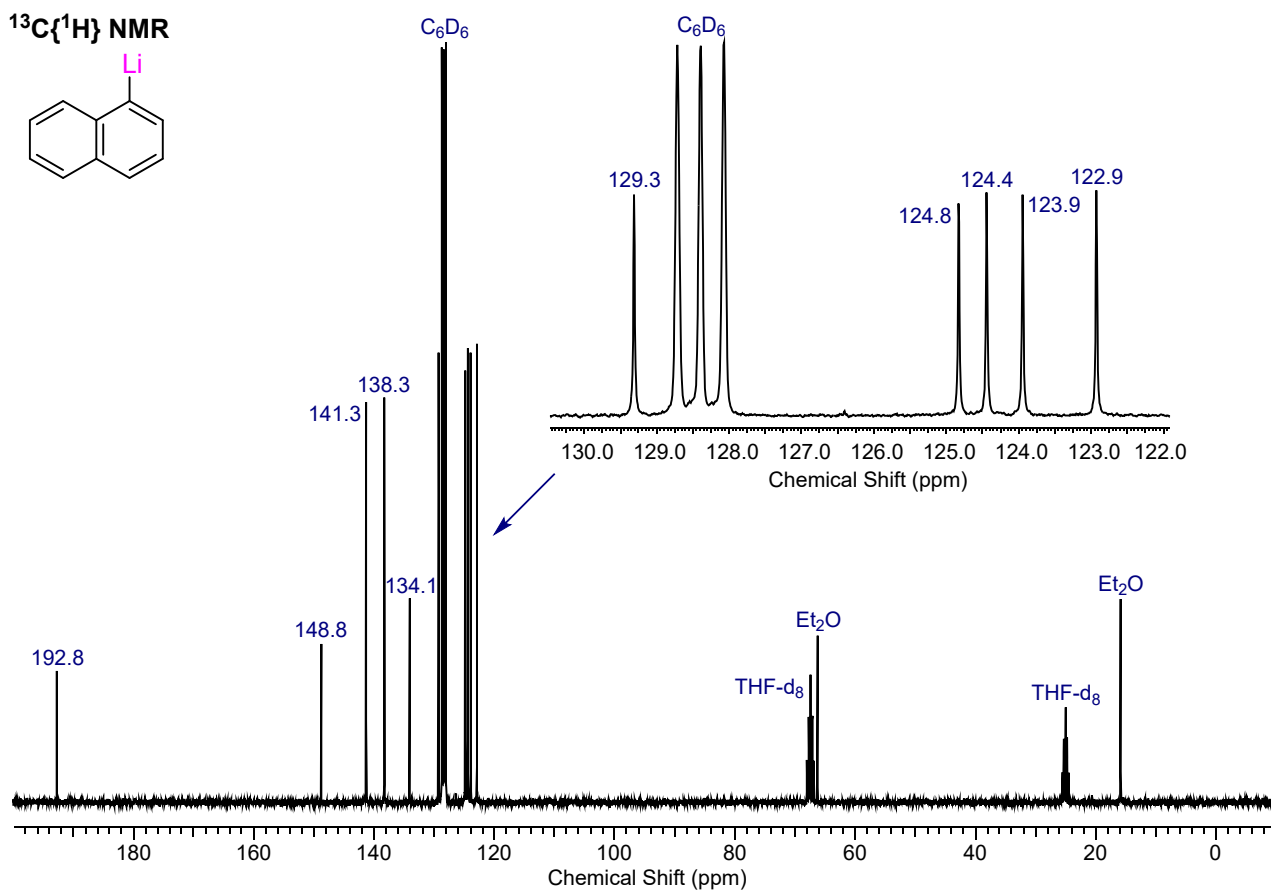

**Spectra S6:**  $^{13}\text{C}\{^1\text{H}\}$  NMR spectrum of 1-Naph-Li in  $\text{C}_6\text{D}_6/\text{THF-d}_8$ .

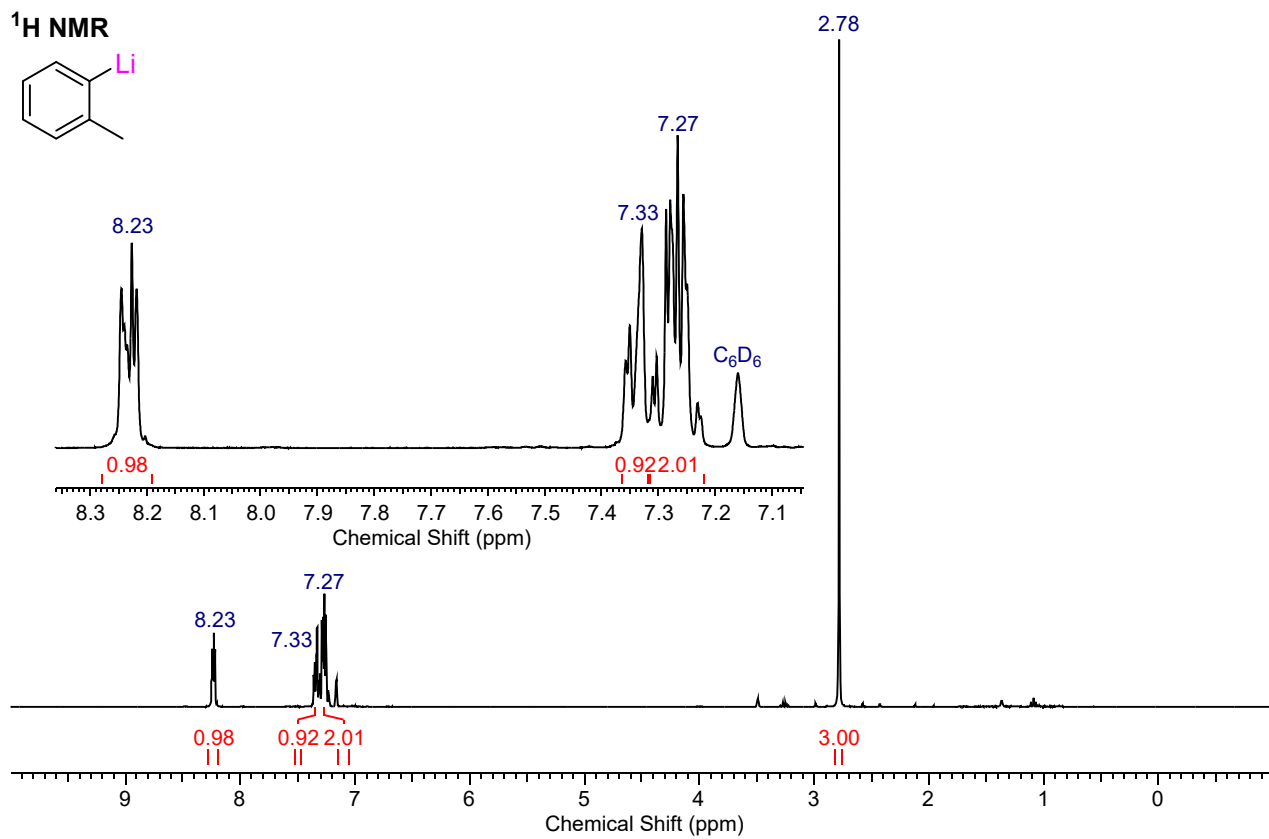

**Spectra S7:** <sup>1</sup>H NMR spectrum of *o*-Tol-Li in C<sub>6</sub>D<sub>6</sub>/THF-d<sub>8</sub>.

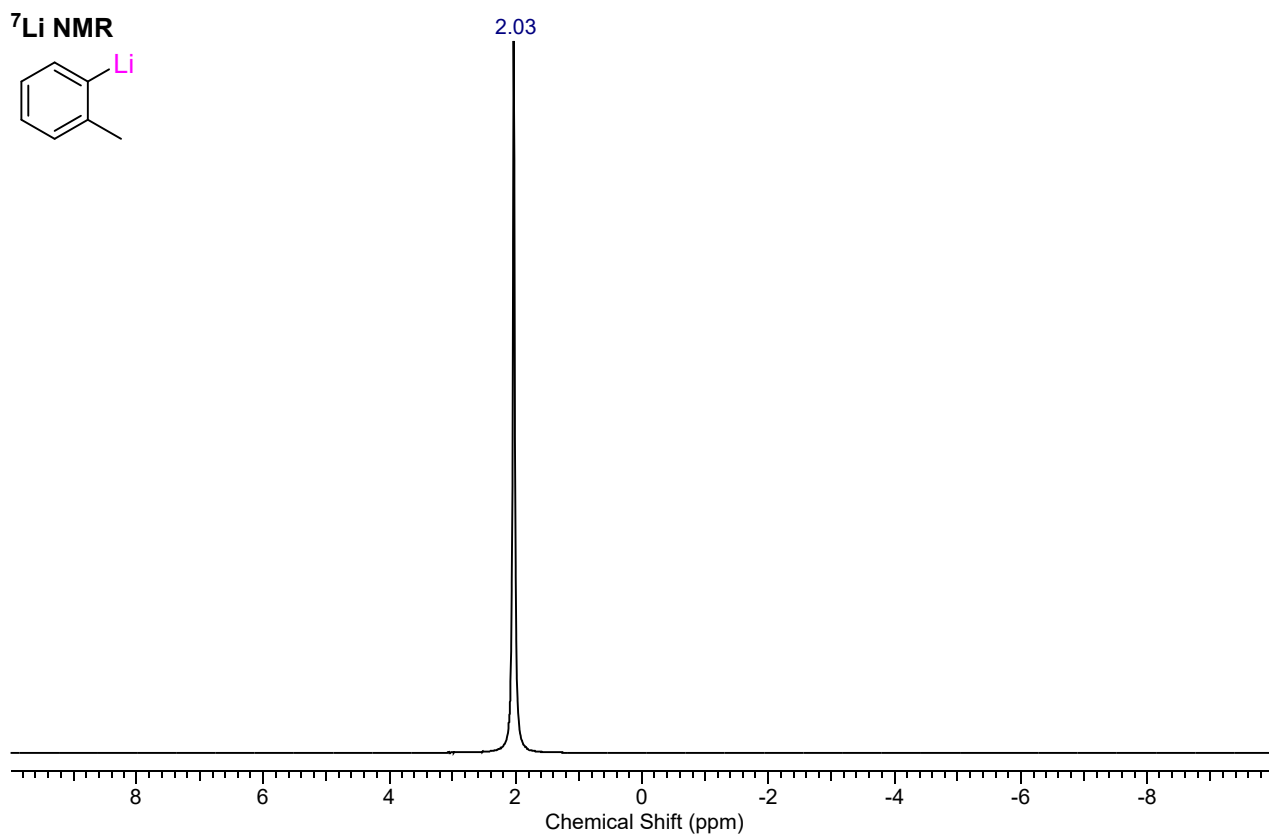

**Spectra S8:** <sup>7</sup>Li NMR spectrum of *o*-Tol-Li in C<sub>6</sub>D<sub>6</sub>/THF-d<sub>8</sub>.



$^{13}\text{C}\{^1\text{H}\}$  NMR

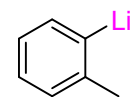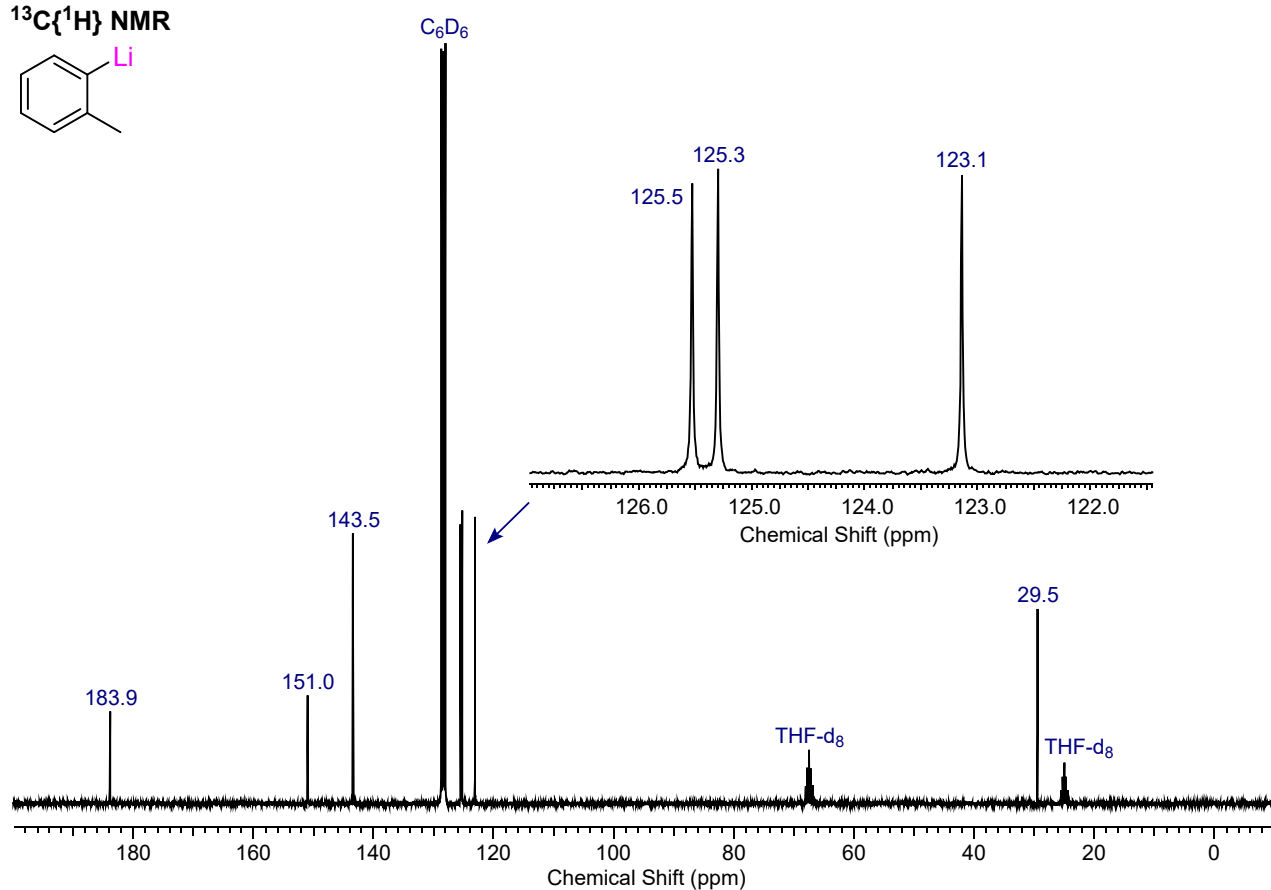

**Spectra S9:**  $^{13}\text{C}\{^1\text{H}\}$  NMR spectrum of *o*-Tol-Li in  $\text{C}_6\text{D}_6/\text{THF-d}_8$ .

$^1\text{H}$  NMR

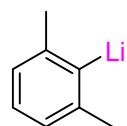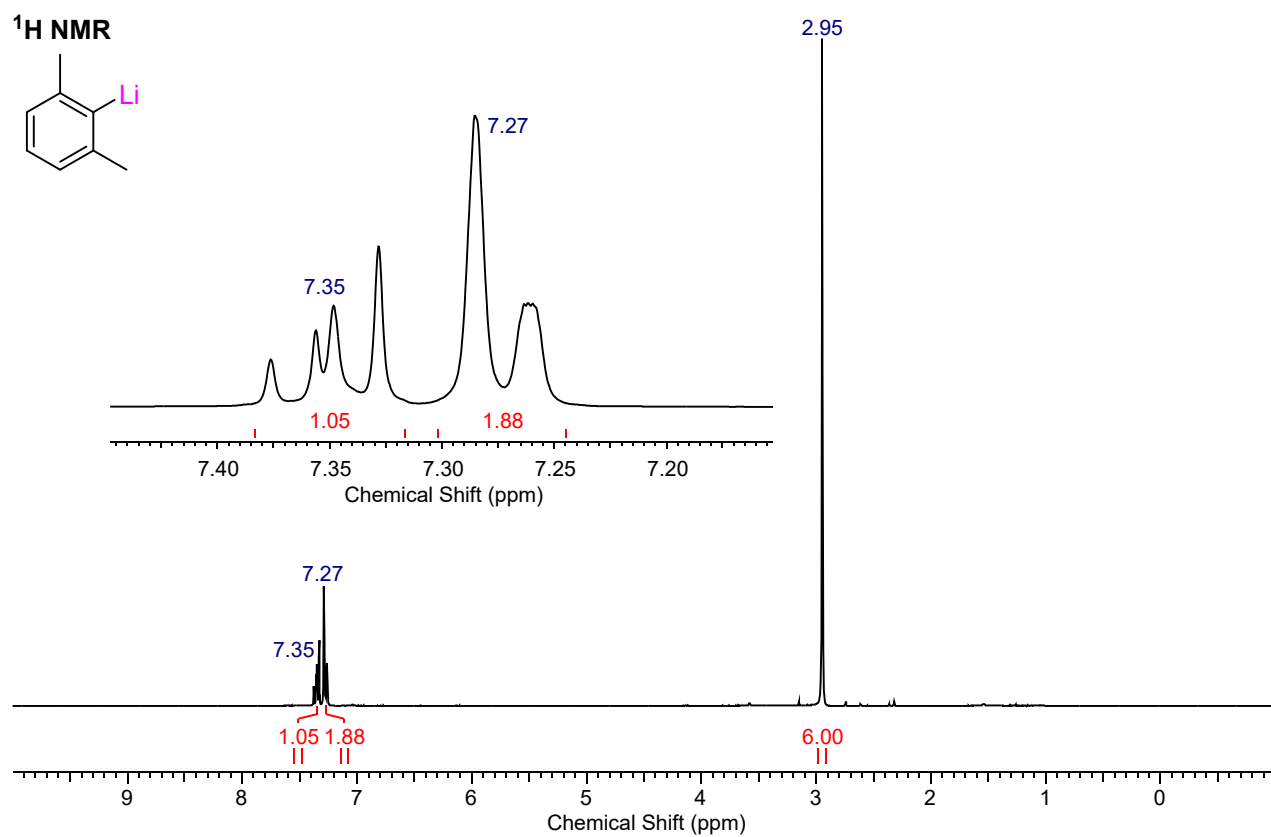

**Spectra S10:**  $^1\text{H}$  NMR spectrum of 2,6-Me<sub>2</sub>-C<sub>6</sub>H<sub>3</sub>-Li in  $\text{C}_6\text{D}_6/\text{THF-d}_8$ .

<sup>7</sup>Li NMR

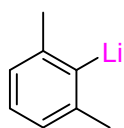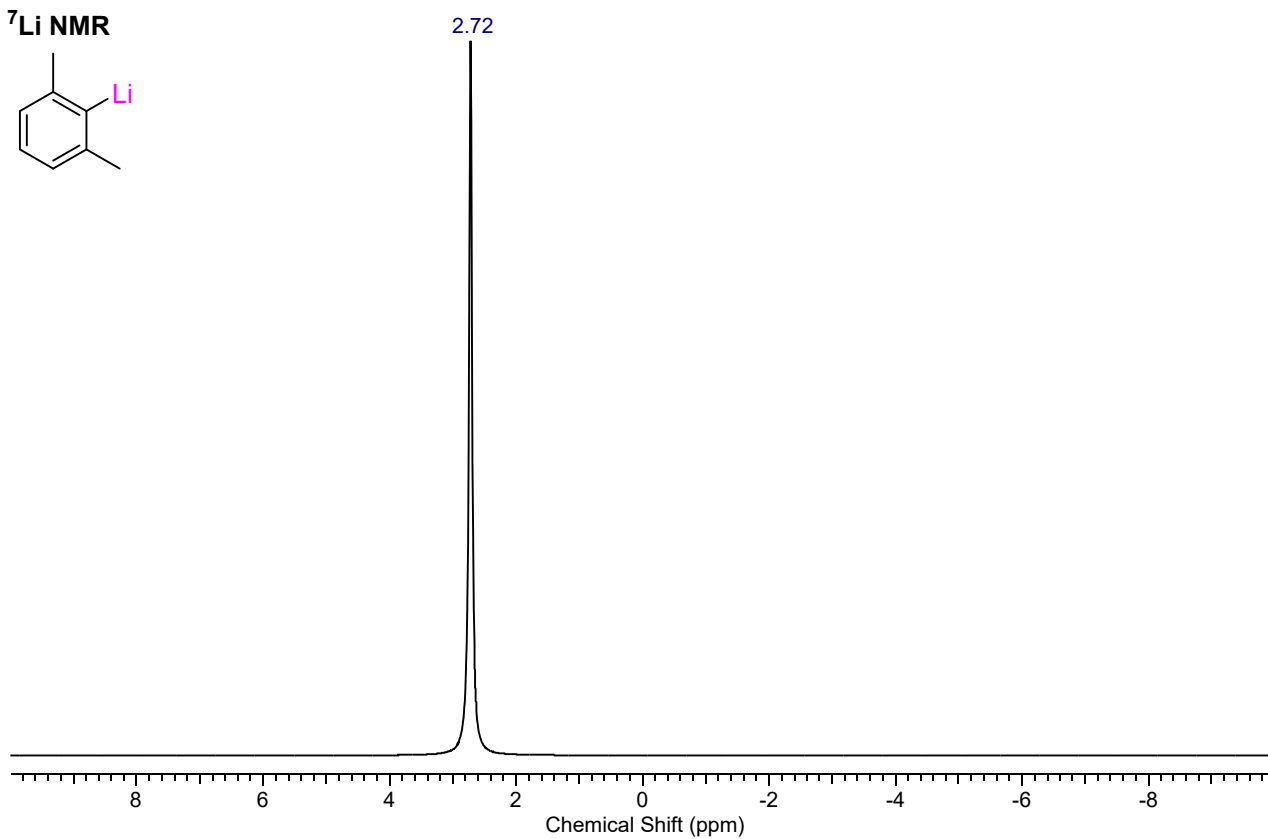

Spectra S11: <sup>7</sup>Li NMR spectrum of 2,6-Me<sub>2</sub>-C<sub>6</sub>H<sub>3</sub>-Li in C<sub>6</sub>D<sub>6</sub>/THF-d<sub>8</sub>.

<sup>13</sup>C{<sup>1</sup>H} NMR

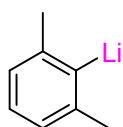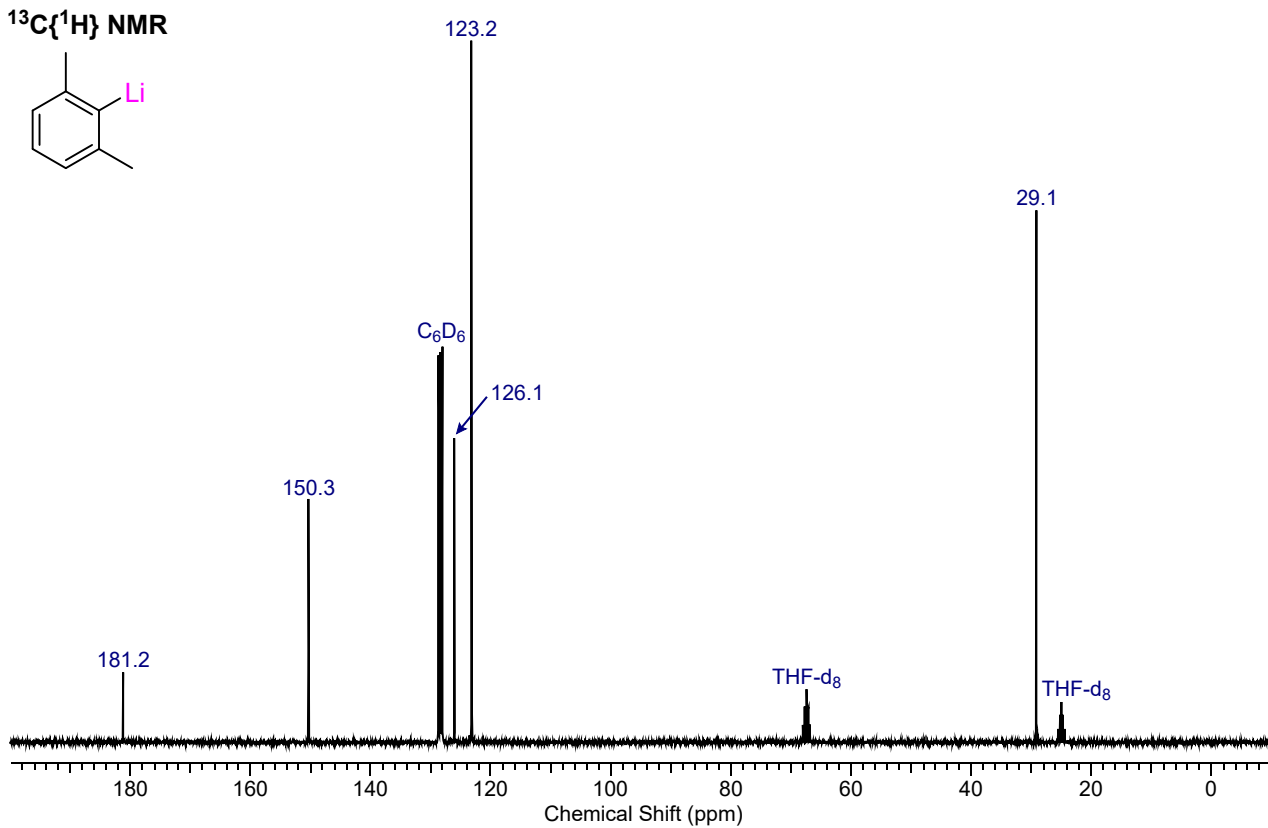

Spectra S12: <sup>13</sup>C{<sup>1</sup>H} NMR spectrum of 2,6-Me<sub>2</sub>-C<sub>6</sub>H<sub>3</sub>-Li in C<sub>6</sub>D<sub>6</sub>/THF-d<sub>8</sub>.

<sup>1</sup>H NMR

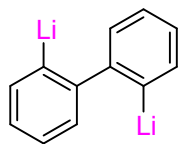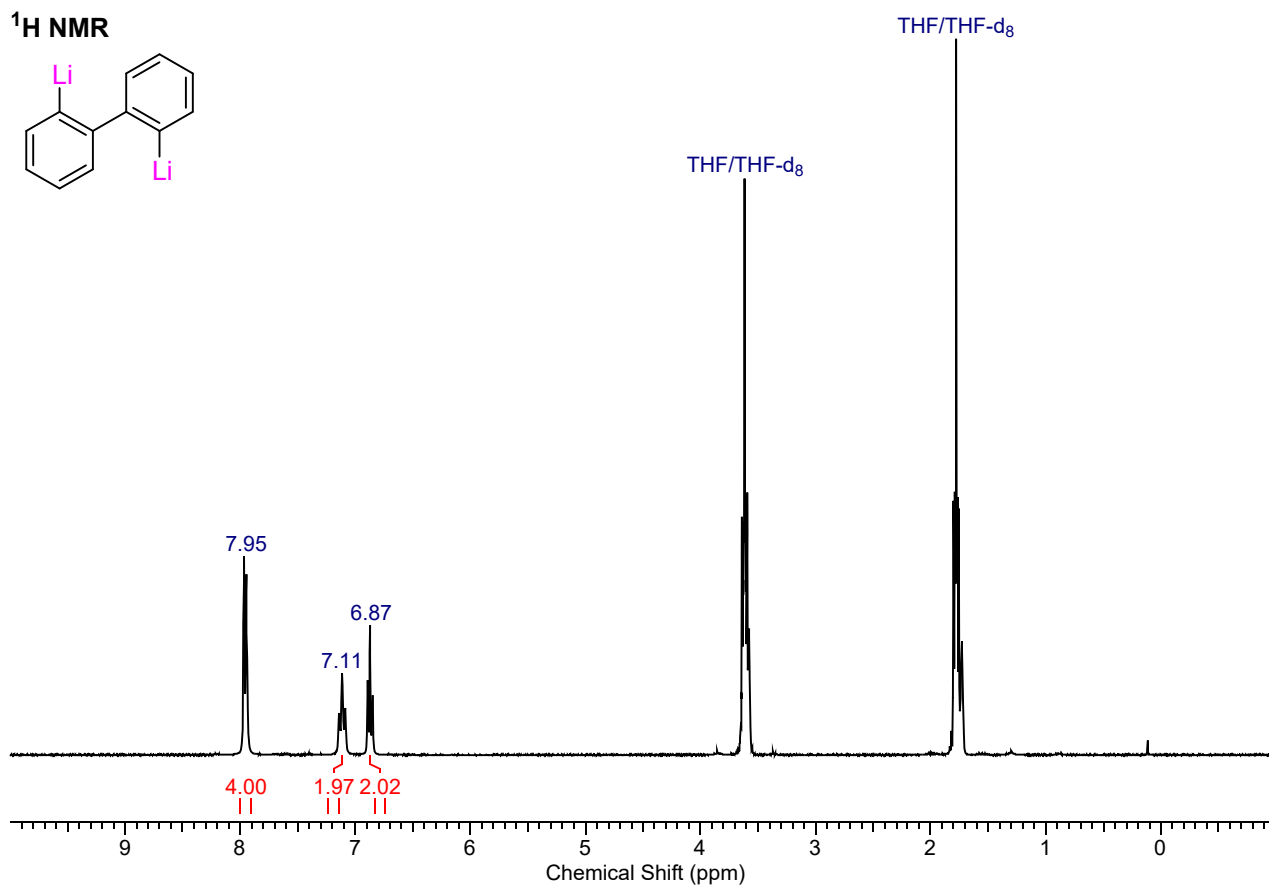

**Spectra S13:** <sup>1</sup>H NMR spectrum of 2,2'-dilithiobiphenyl in THF-d<sub>8</sub>.

<sup>7</sup>Li NMR

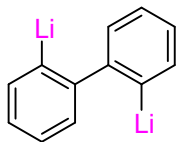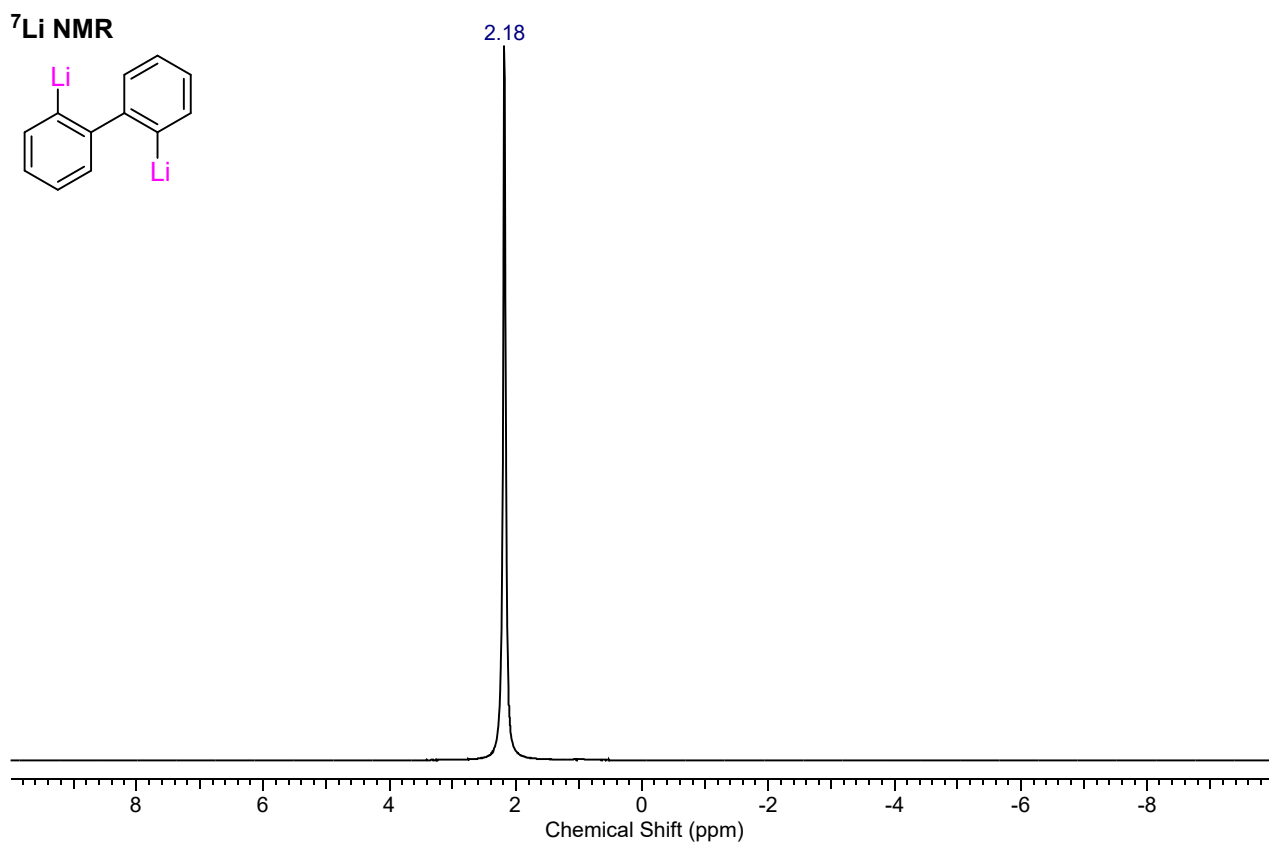

**Spectra S14:** <sup>7</sup>Li NMR spectrum of 2,2'-dilithiobiphenyl in THF-d<sub>8</sub>.

$^{13}\text{C}\{^1\text{H}\}$  NMR

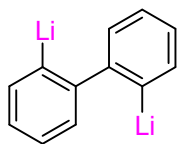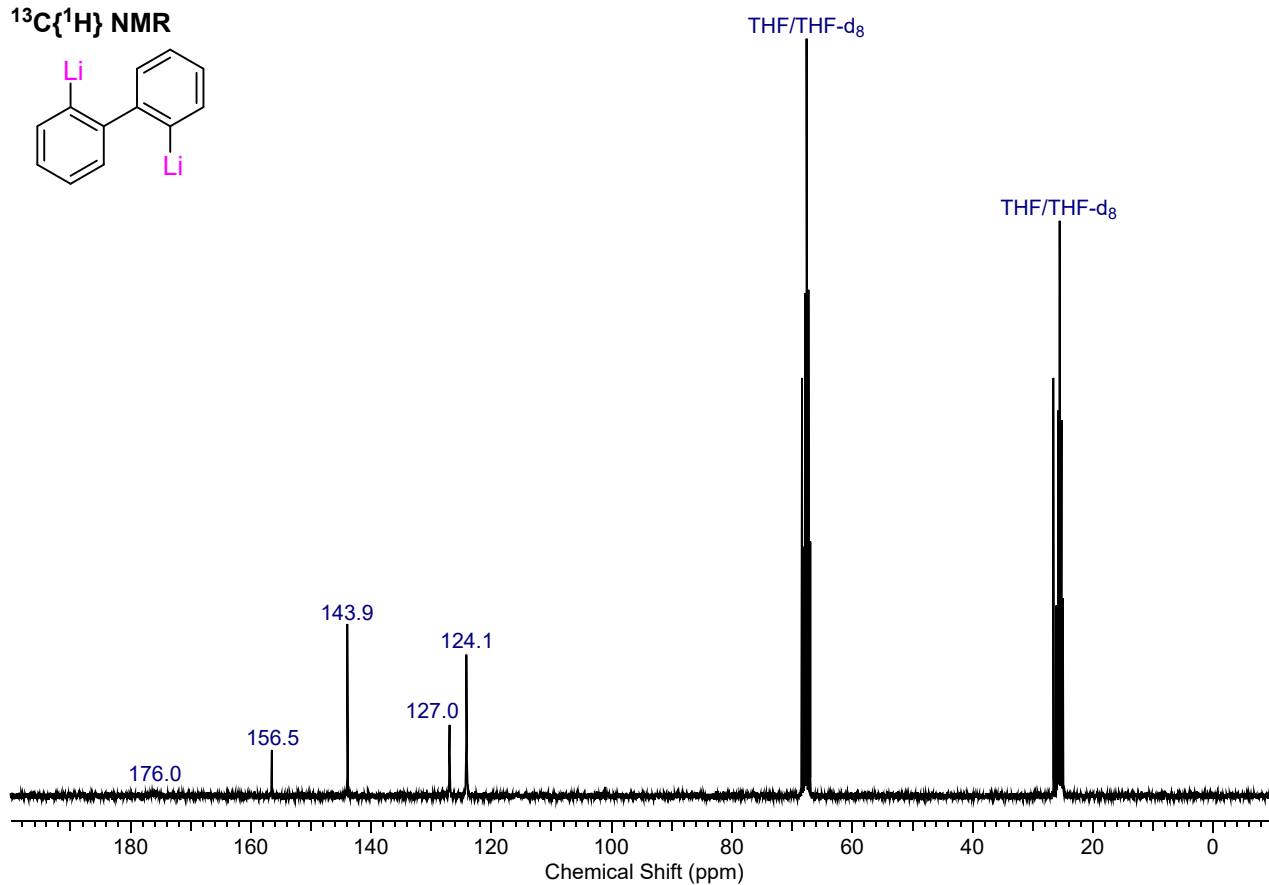

**Spectra S15:**  $^{13}\text{C}\{^1\text{H}\}$  NMR spectrum of 2,2'-dilithiobiphenyl in THF-d<sub>8</sub>.

$^1\text{H}$  NMR

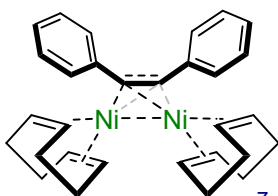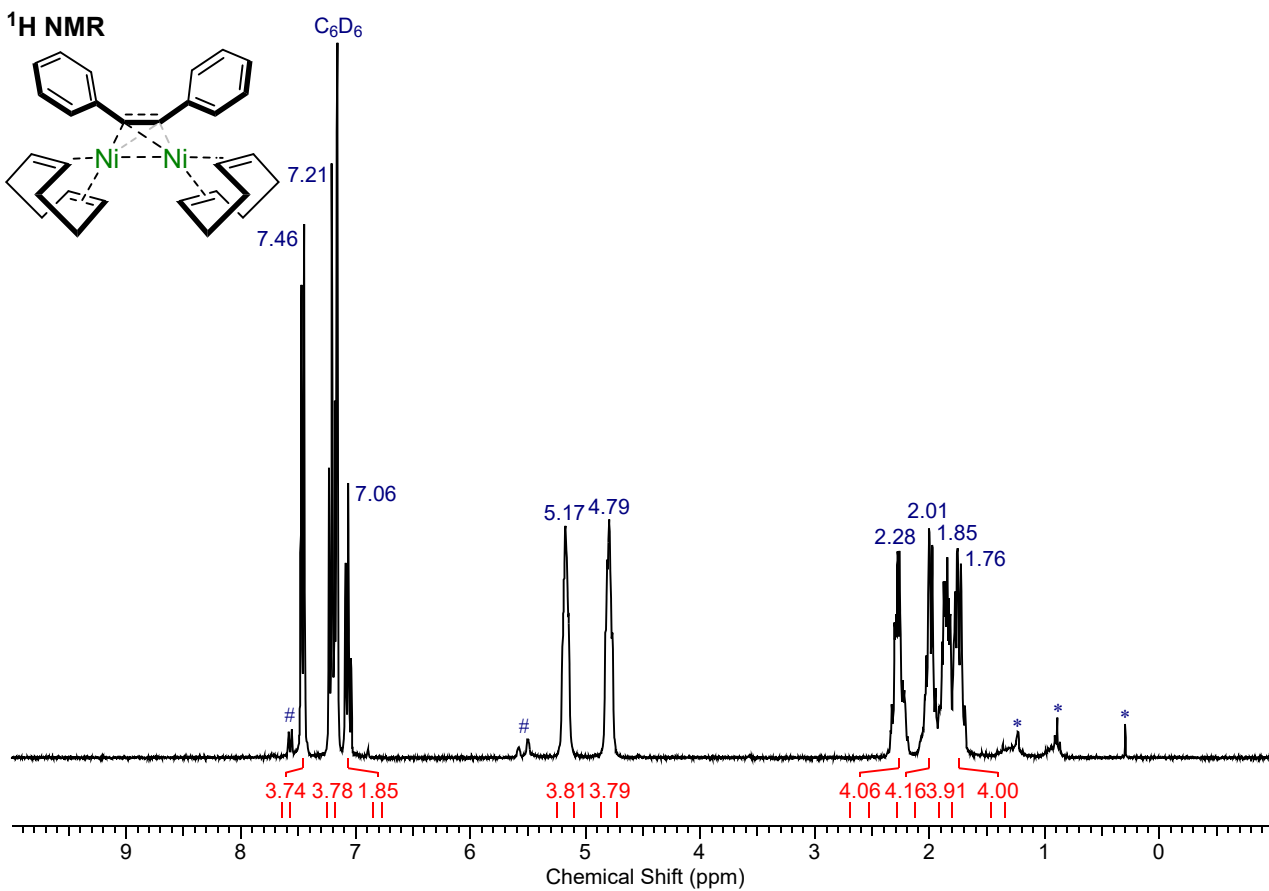

**Spectra S16:**  $^1\text{H}$  NMR spectrum of  $[(\text{COD})\text{Ni}]_2[\mu_2:\eta^2,\eta^2\text{-Ph-C}\equiv\text{C-Ph}]$  in C<sub>6</sub>D<sub>6</sub>. # = Trace (COD)Ni $\{\eta^2\text{-Ph-C}\equiv\text{C-Ph}\}$ ; \* = Residual solvent/grease.

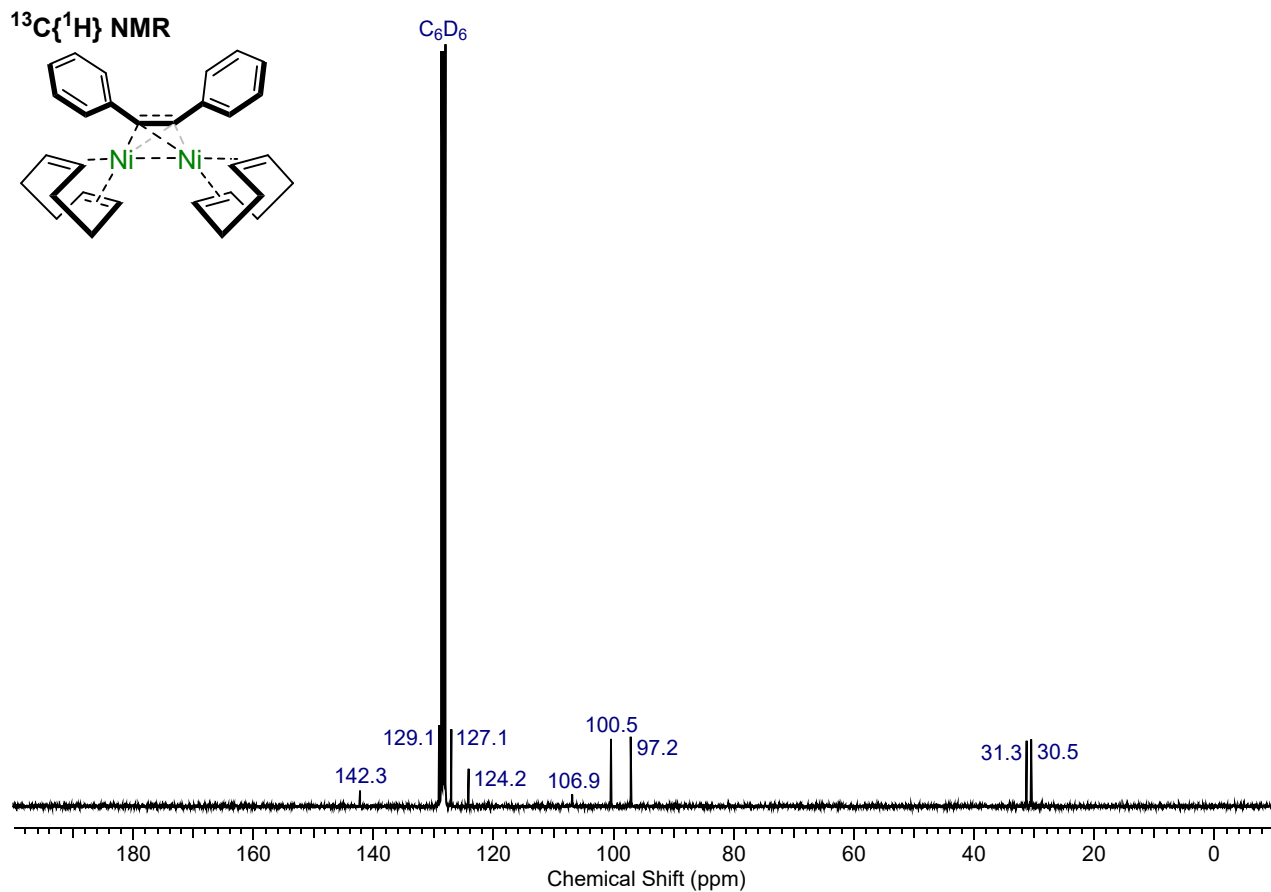

**Spectra S17:** <sup>13</sup>C{<sup>1</sup>H} NMR spectrum of [(COD)Ni]<sub>2</sub>{μ<sub>2</sub>:η<sup>2</sup>,η<sup>2</sup>-Ph-C≡C-Ph} in C<sub>6</sub>D<sub>6</sub>.

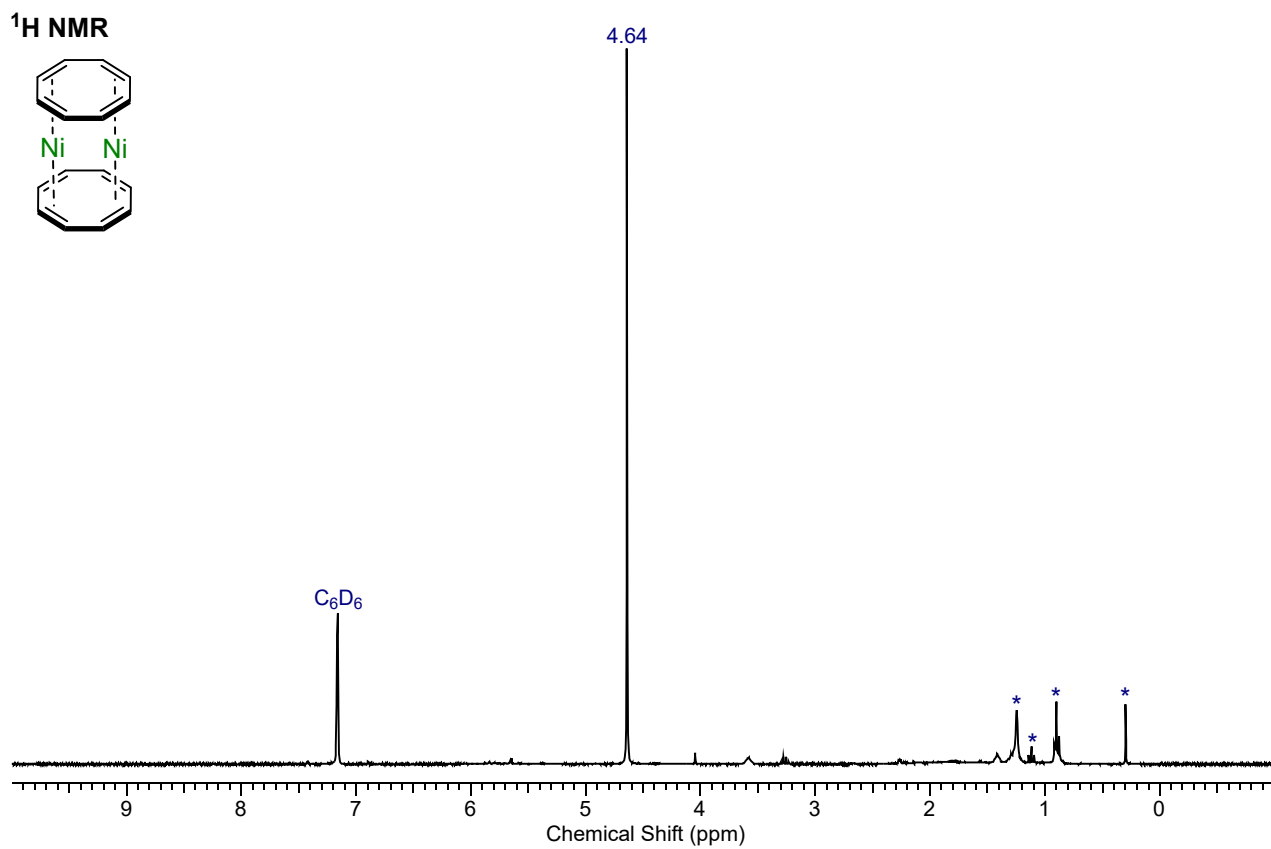

**Spectra S18:** <sup>1</sup>H NMR spectrum of Ni<sub>2</sub>COT<sub>2</sub> in C<sub>6</sub>D<sub>6</sub>. \* = Residual solvent/grease.

$^{13}\text{C}\{^1\text{H}\}$  NMR

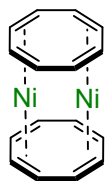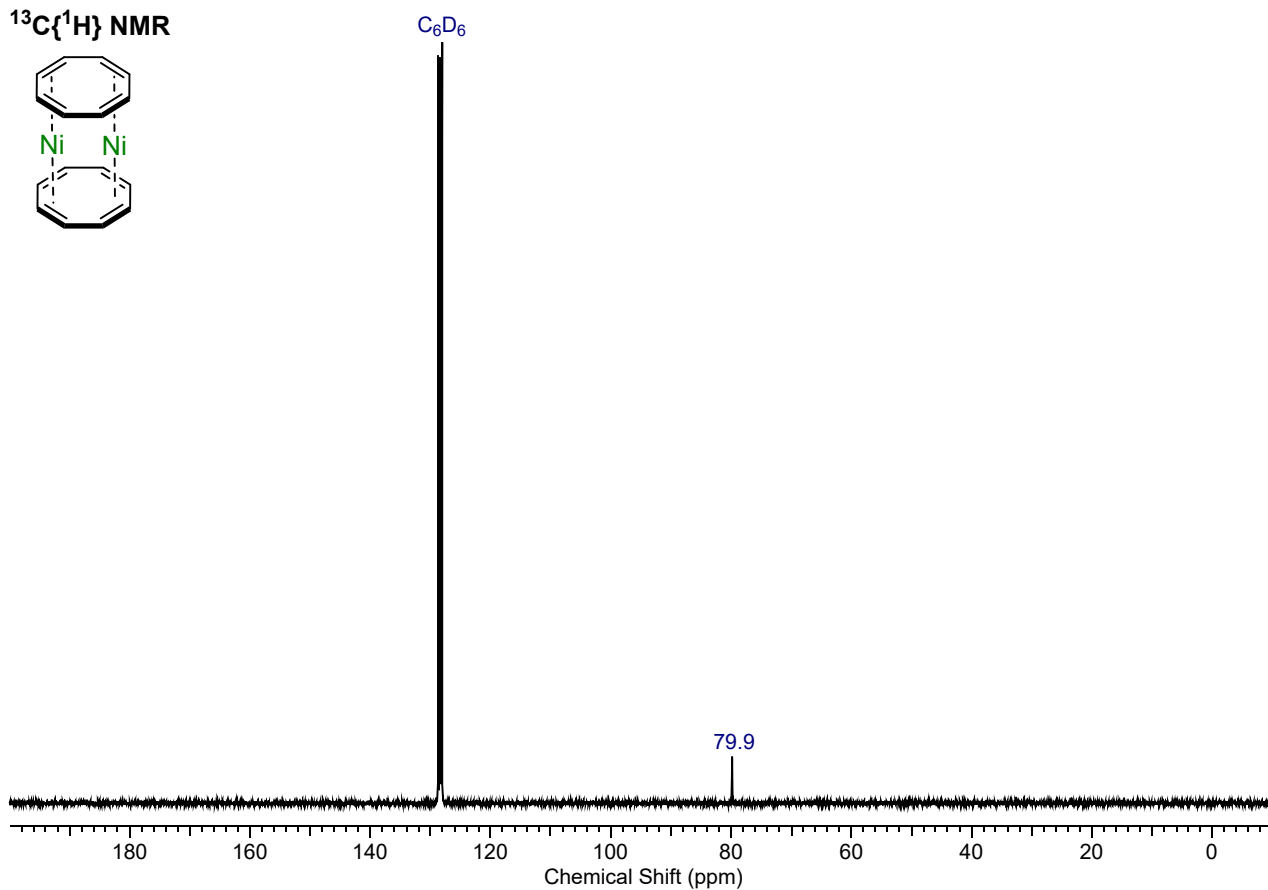

Spectra S19:  $^{13}\text{C}\{^1\text{H}\}$  NMR spectrum of  $\text{Ni}_2\text{COT}_2$  in  $\text{C}_6\text{D}_6$ .

$^1\text{H}$  NMR

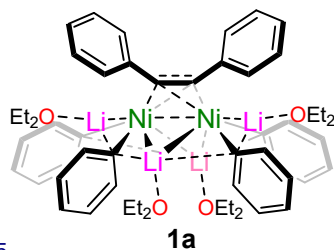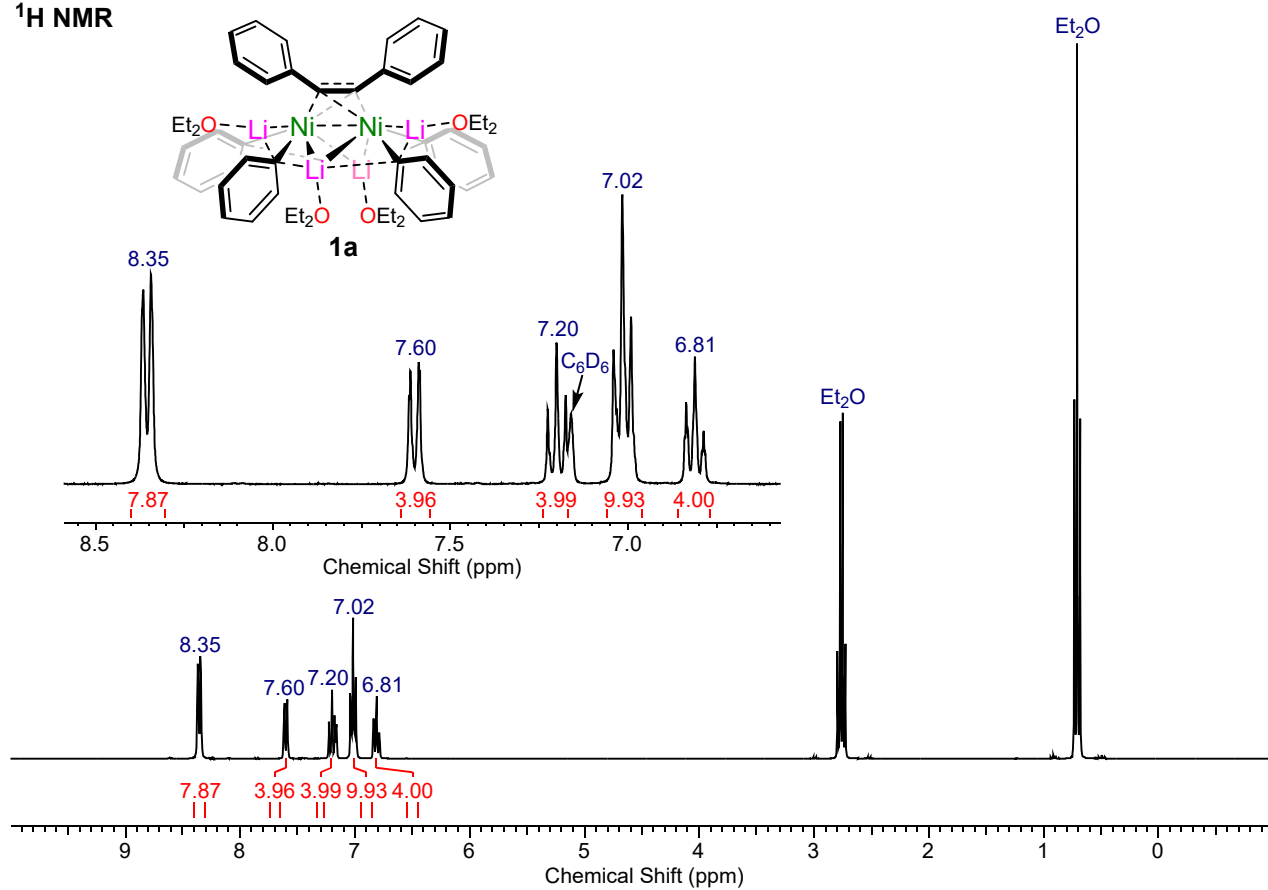

Spectra S20:  $^1\text{H}$  NMR spectrum of **1a** in  $\text{C}_6\text{D}_6$ .

$^7\text{Li}$  NMR

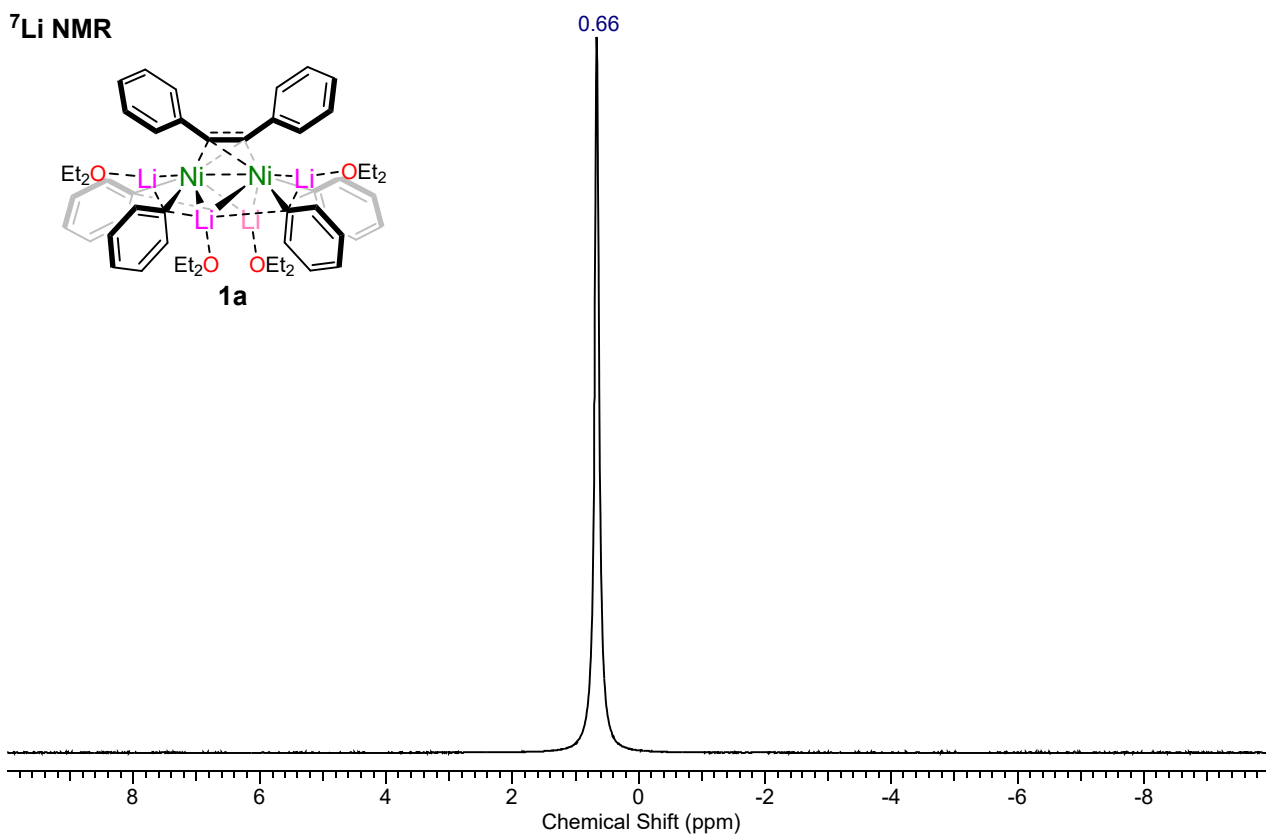

Spectra S21:  $^7\text{Li}$  NMR spectrum of **1a** in  $\text{C}_6\text{D}_6$ .

$^{13}\text{C}\{^1\text{H}\}$  NMR

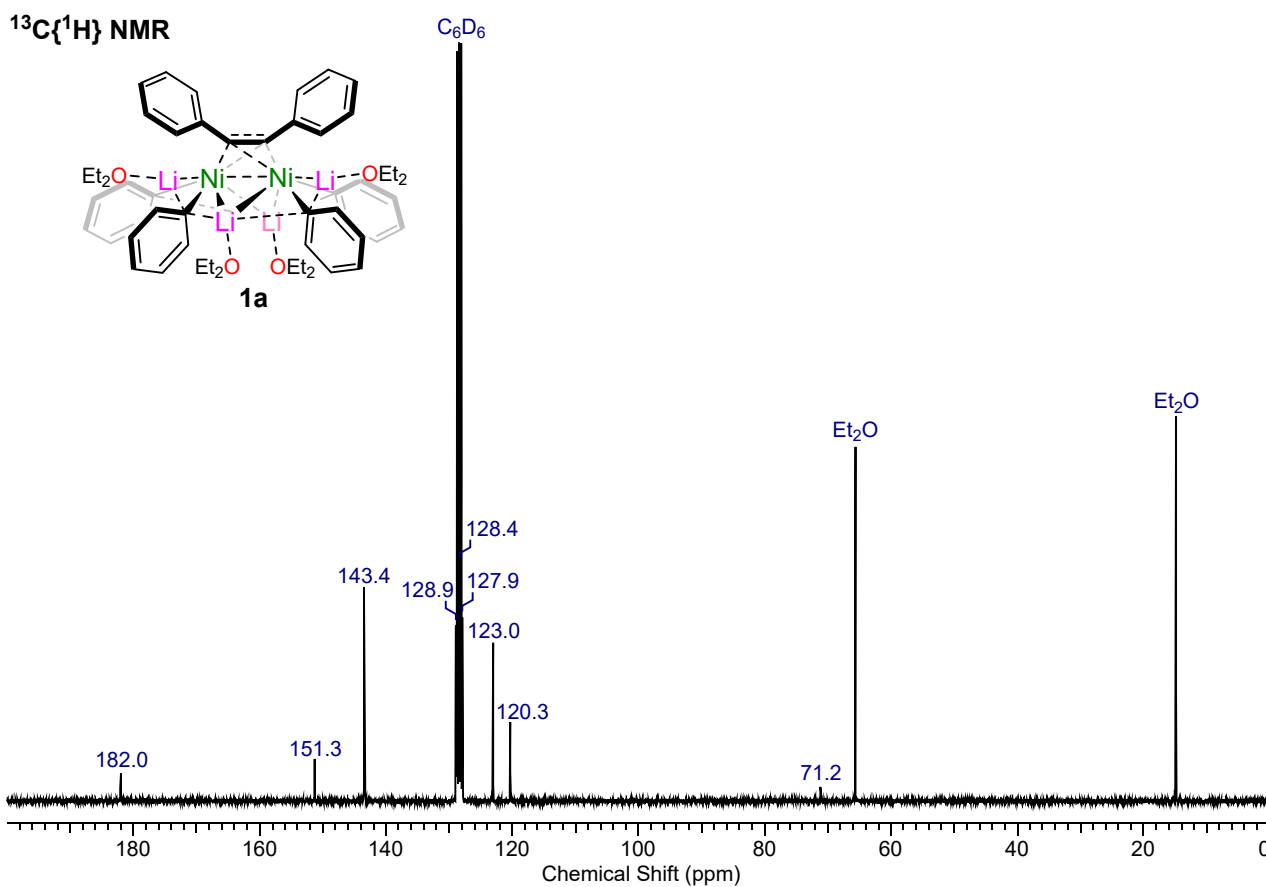

Spectra S22:  $^{13}\text{C}\{^1\text{H}\}$  NMR spectrum of **1a** in  $\text{C}_6\text{D}_6$ .

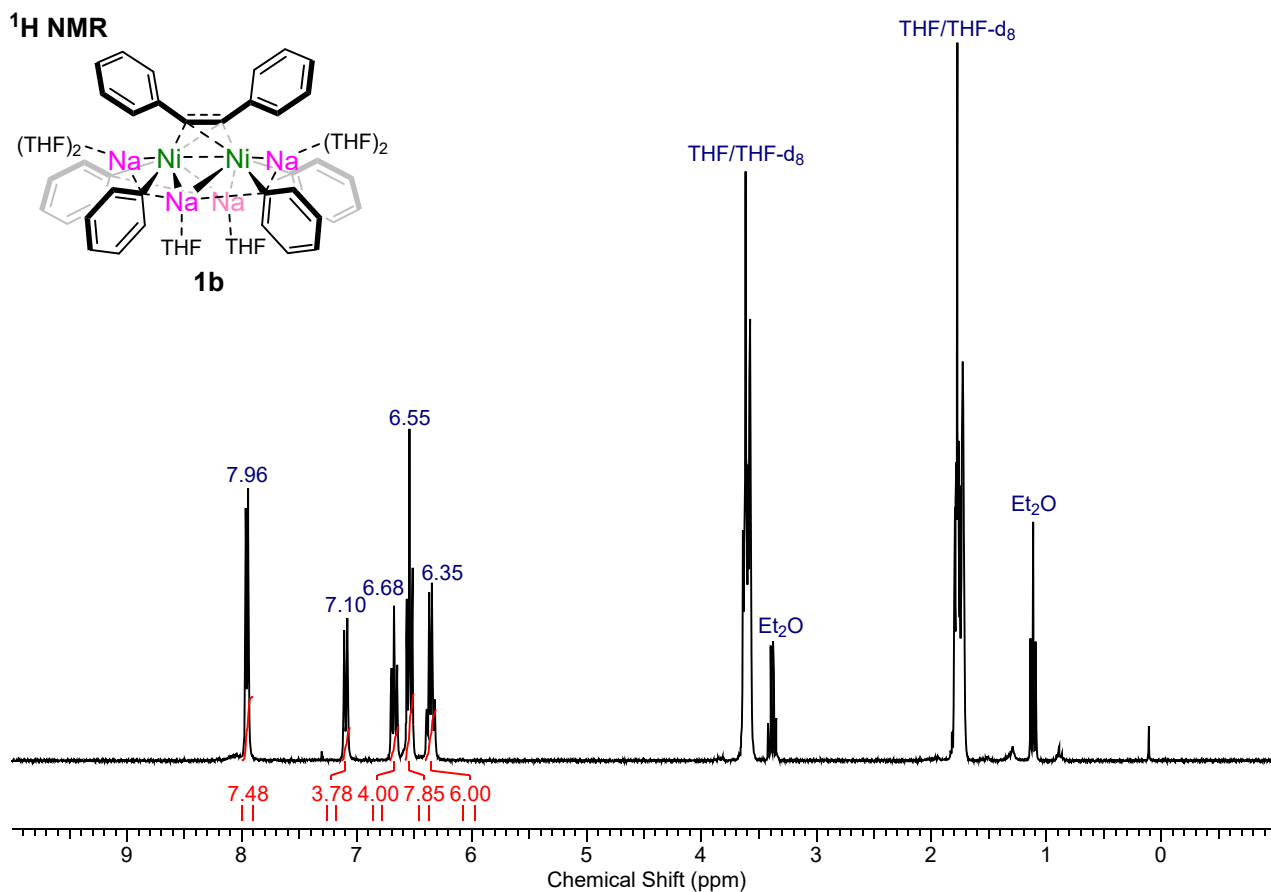

**Spectra S23:** <sup>1</sup>H NMR spectrum of **1b** in THF-d<sub>8</sub>.

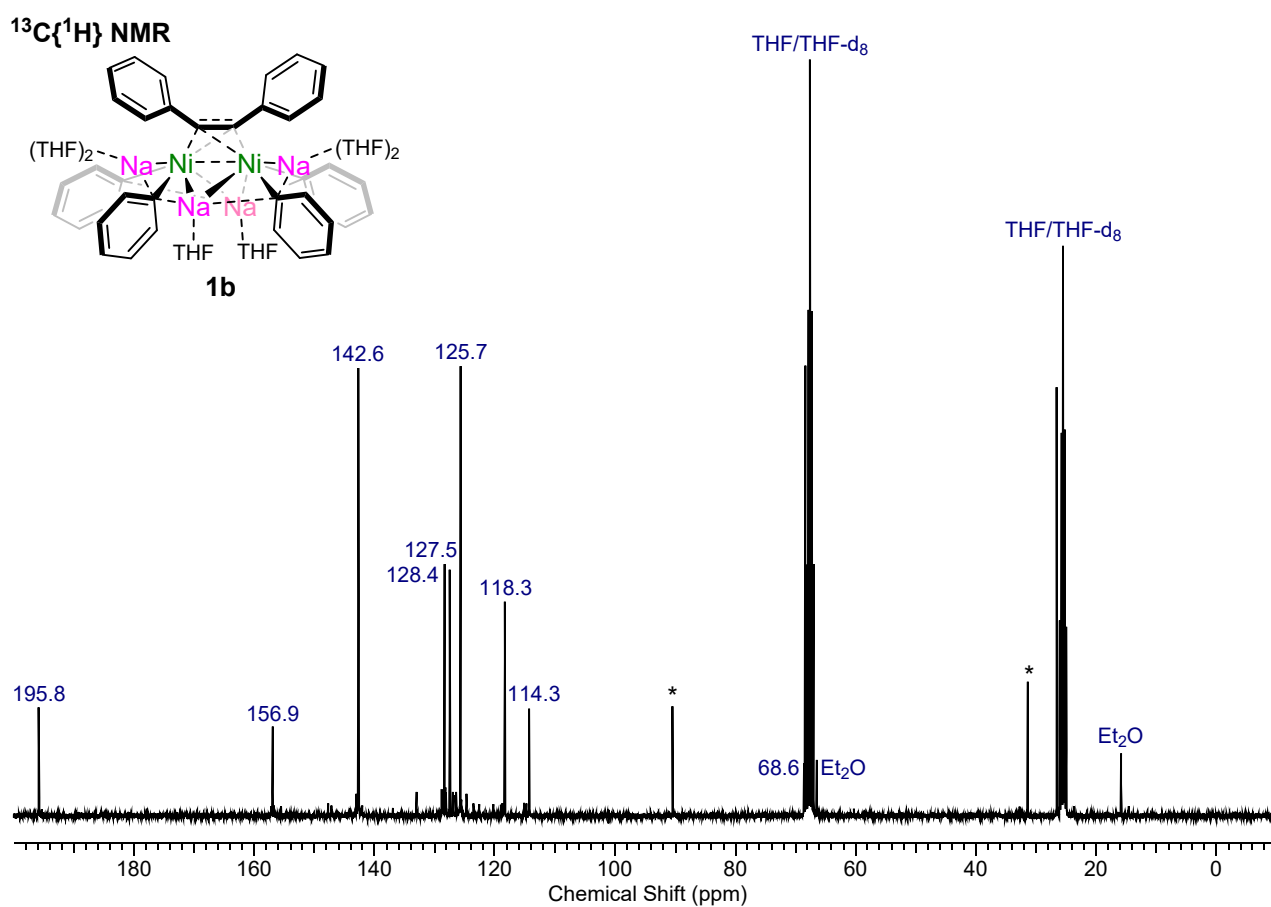

**Spectra S24:** <sup>13</sup>C{<sup>1</sup>H} NMR spectrum of **1b** in THF-d<sub>8</sub>. \* Trace Ni(COD)<sub>2</sub>.



<sup>1</sup>H NMR

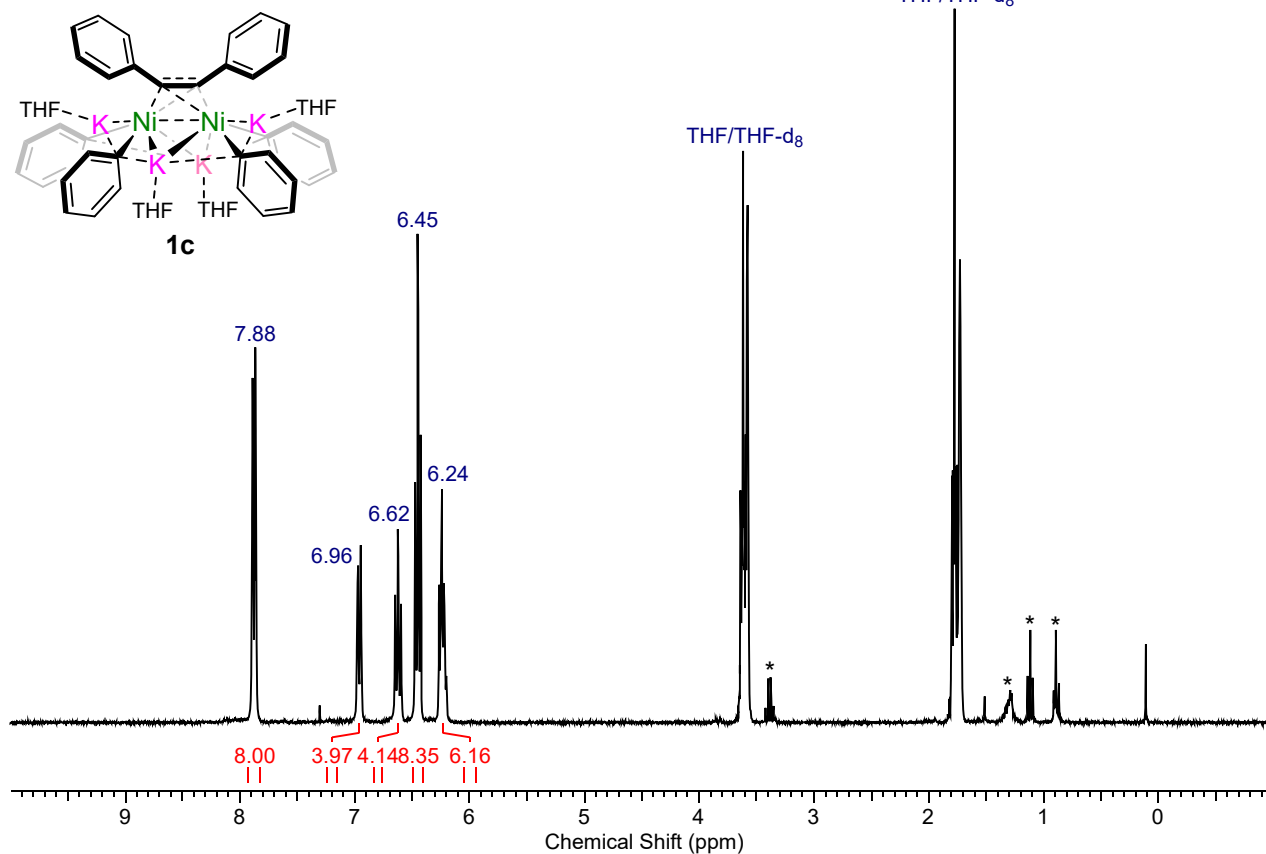

**Spectra S25:** <sup>1</sup>H NMR spectrum of **1c** in THF-d<sub>8</sub>. \* = Residual Et<sub>2</sub>O/pentane.

<sup>13</sup>C{<sup>1</sup>H} NMR

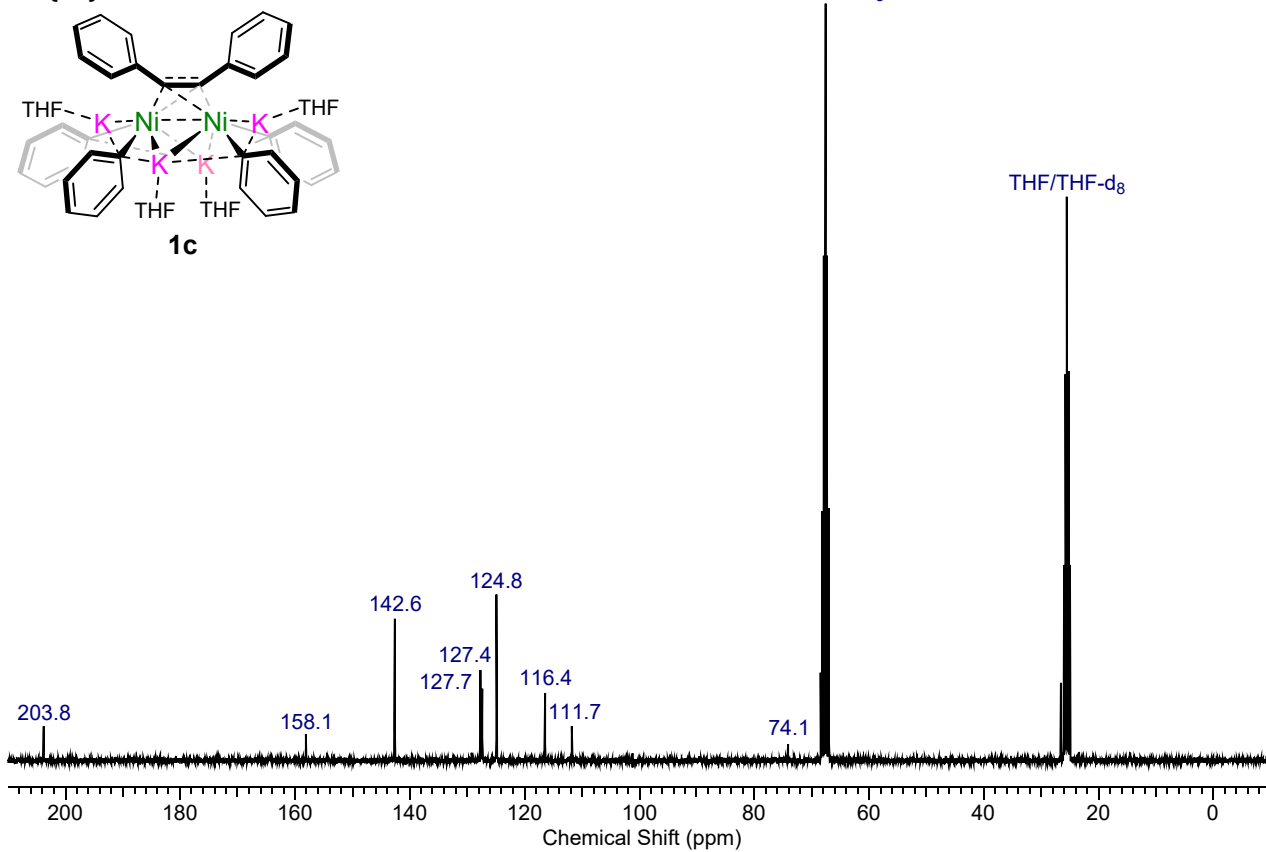

**Spectra S26:** <sup>13</sup>C{<sup>1</sup>H} NMR spectrum of **1c** in THF-d<sub>8</sub>.

<sup>1</sup>H NMR

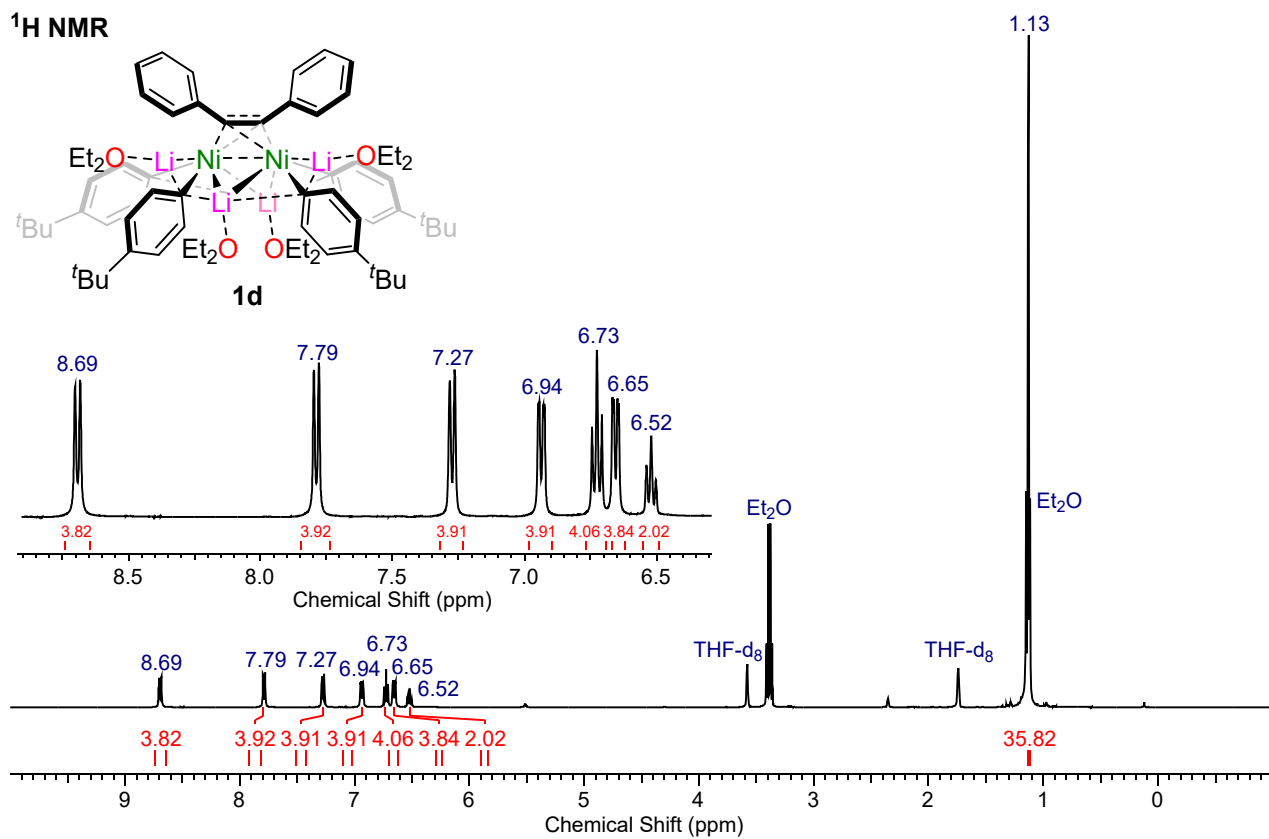

Spectra S27: <sup>1</sup>H NMR spectrum of **1d** in THF-d<sub>8</sub> at -40 °C.

<sup>7</sup>Li NMR

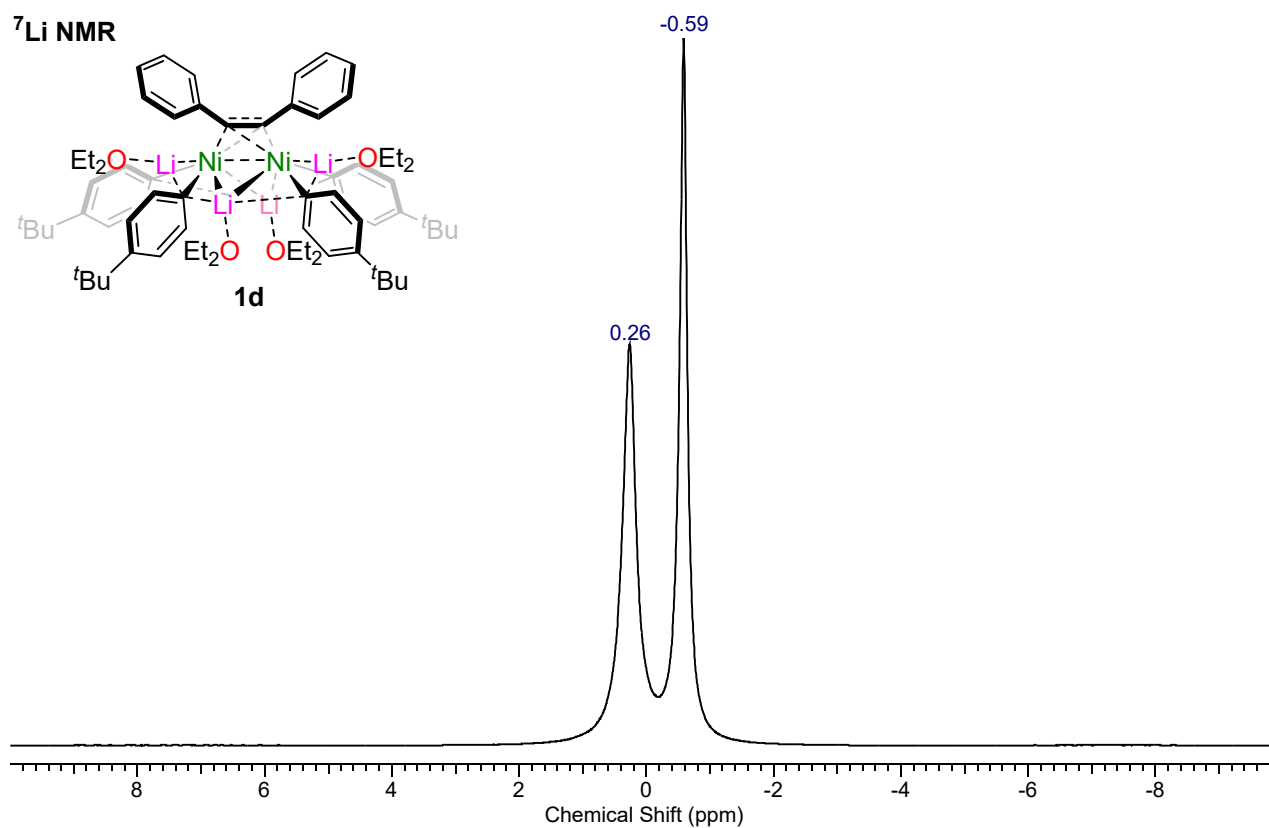

Spectra S28: <sup>7</sup>Li NMR spectrum of **1d** in THF-d<sub>8</sub> at -40 °C.

$^{13}\text{C}\{^1\text{H}\}$  NMR

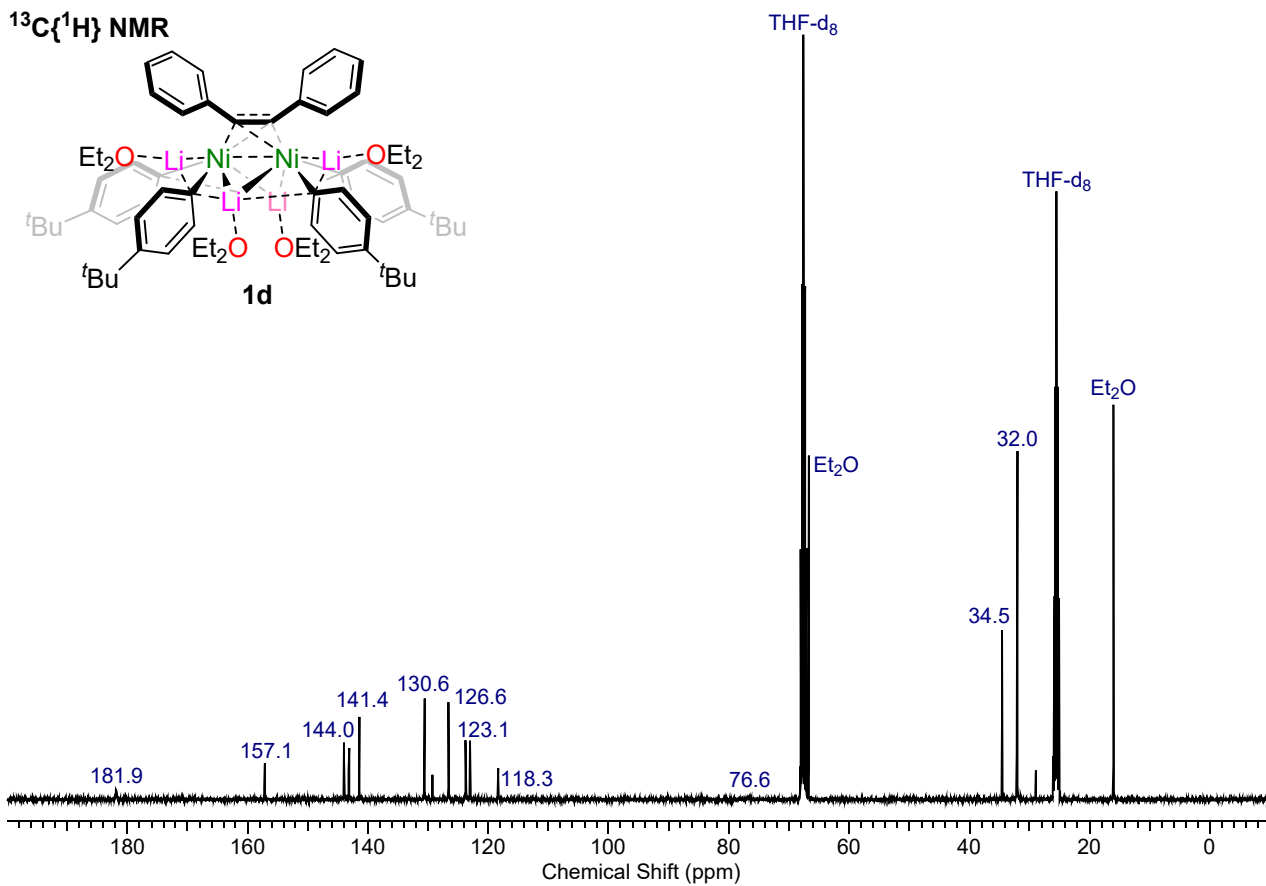

**Spectra S29:**  $^{13}\text{C}\{^1\text{H}\}$  NMR spectrum of **1d** in THF- $\text{d}_8$  at  $-40\text{ }^\circ\text{C}$ .

$^1\text{H}$  NMR

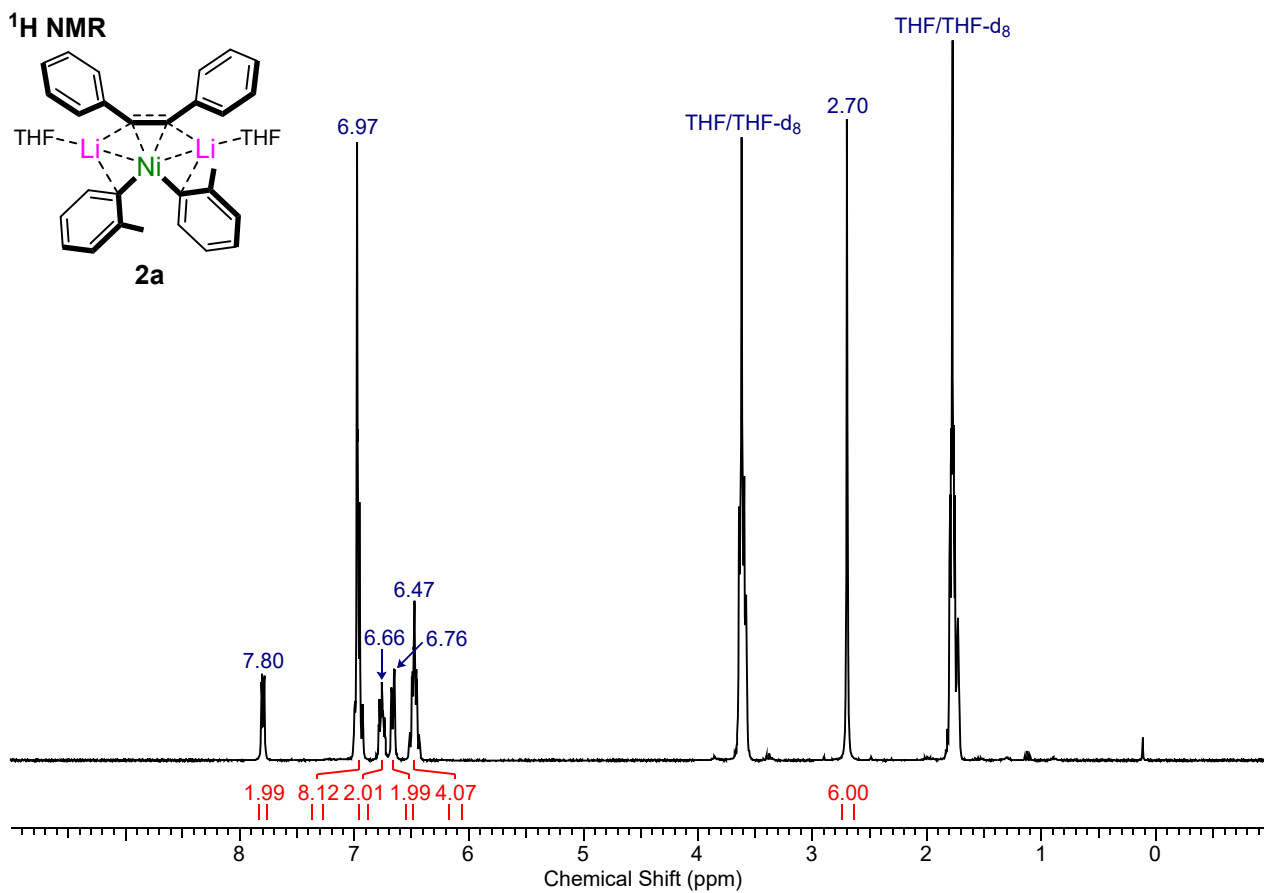

**Spectra S30:**  $^1\text{H}$  NMR spectrum of **2a** in THF- $\text{d}_8$ .

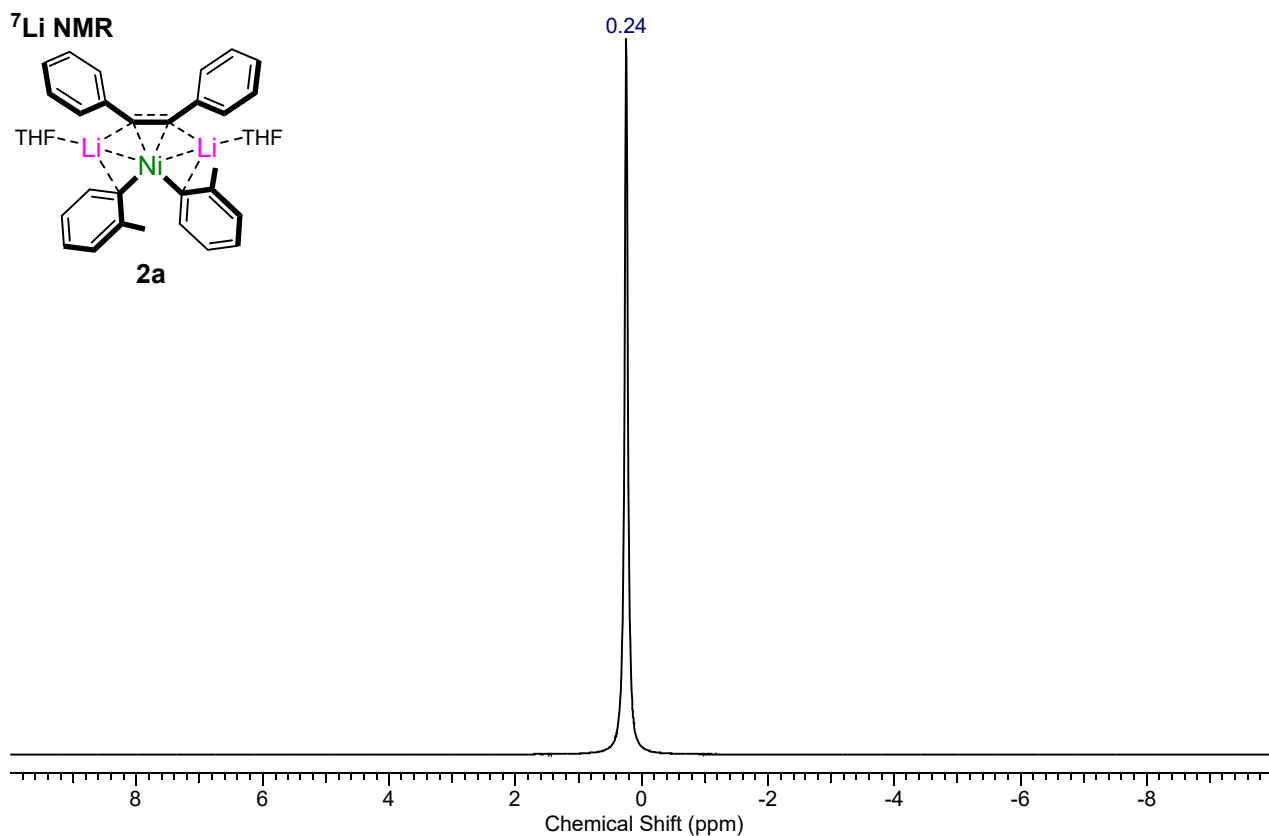

**Spectra S31:** <sup>7</sup>Li NMR spectrum of **2a** in THF-d<sub>8</sub>.

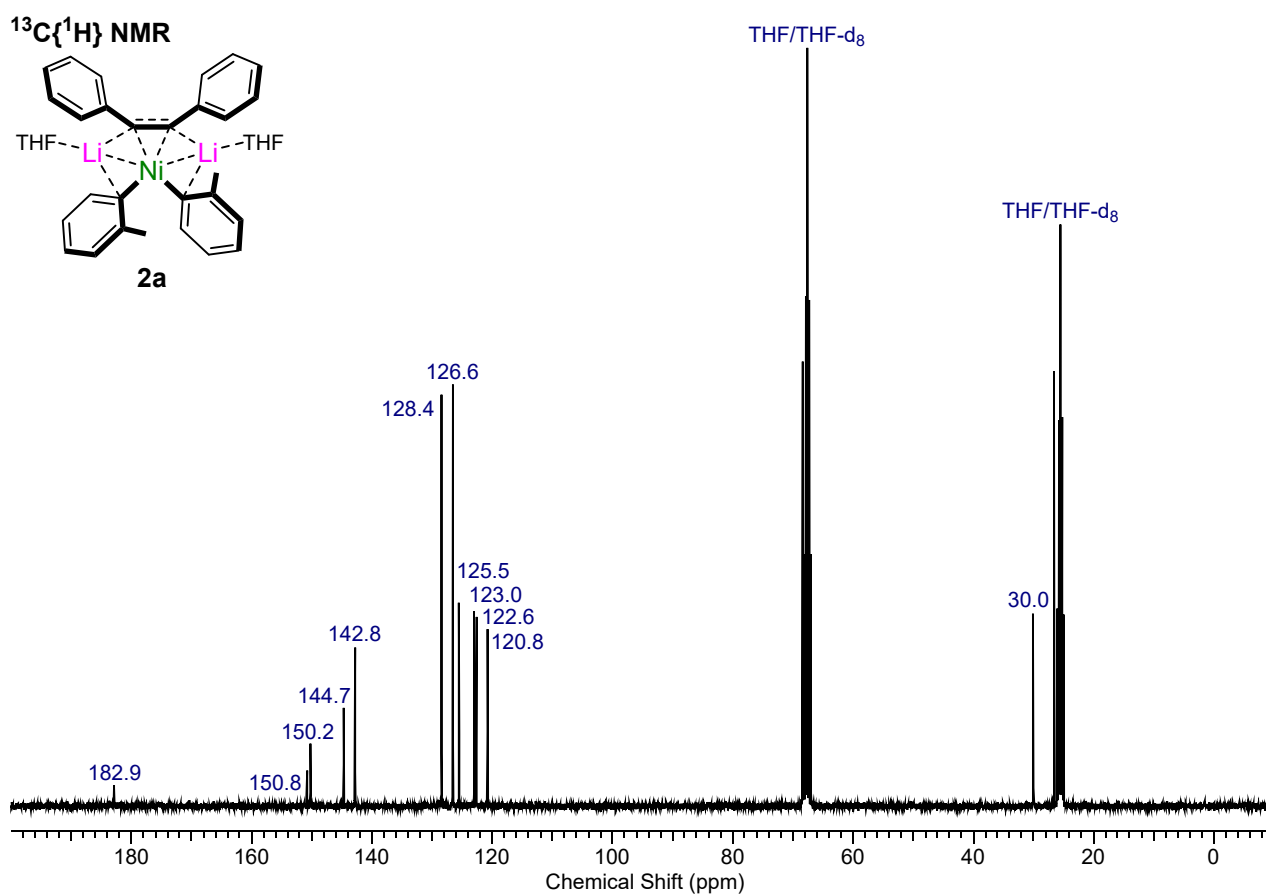

**Spectra S32:** <sup>13</sup>C{<sup>1</sup>H} NMR spectrum of **2a** in THF-d<sub>8</sub>.

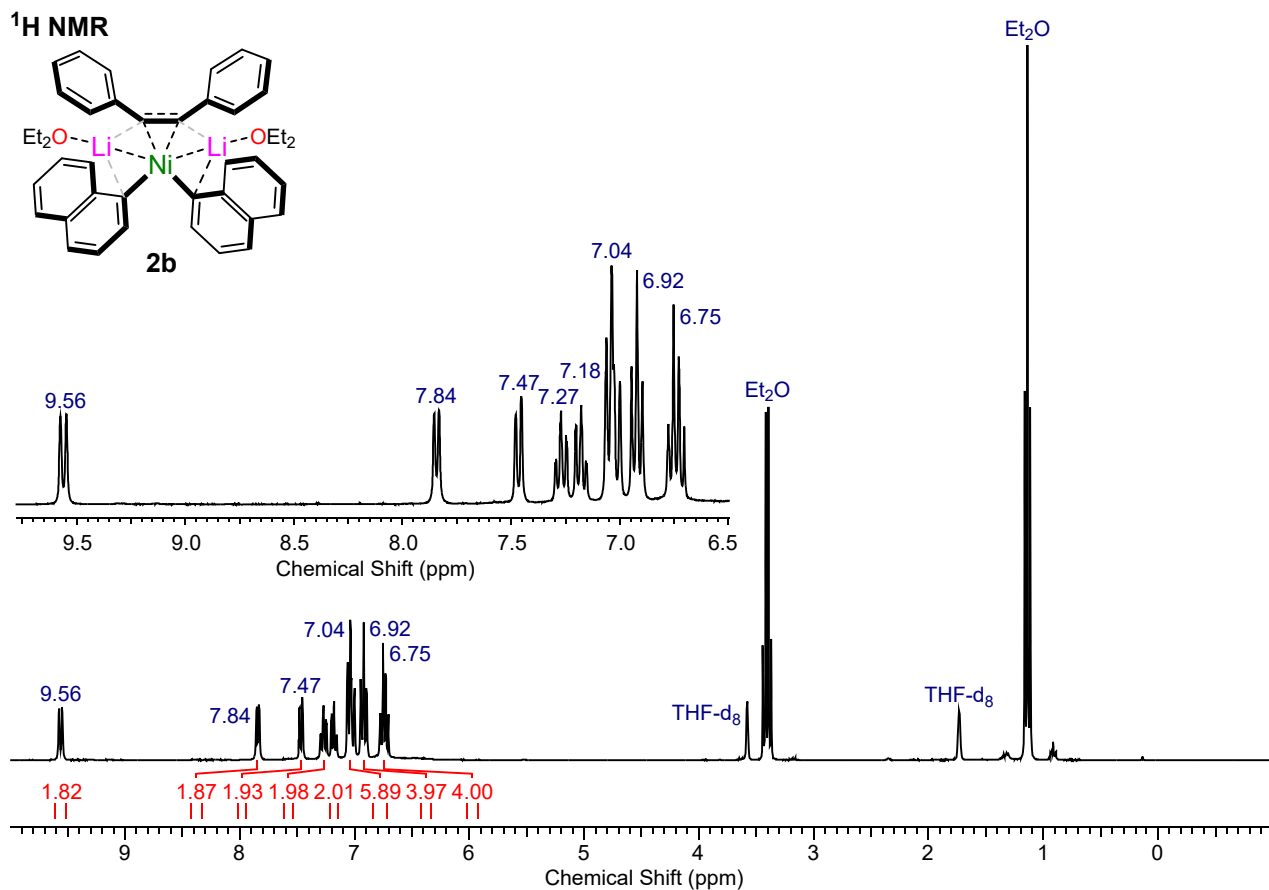

**Spectra S33:** <sup>1</sup>H NMR spectrum of **2b** in THF-d<sub>8</sub>.

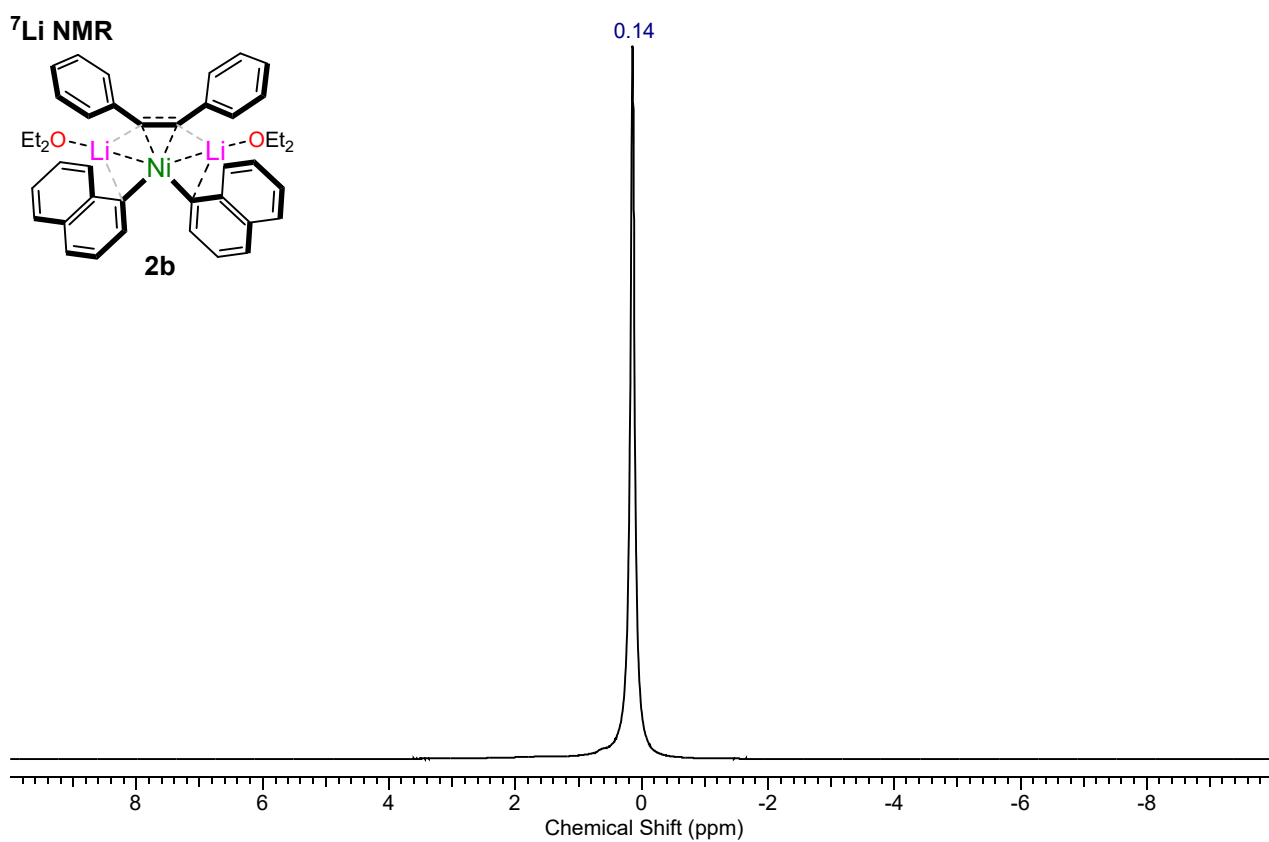

**Spectra S34:** <sup>7</sup>Li NMR spectrum of **2b** in THF-d<sub>8</sub>.

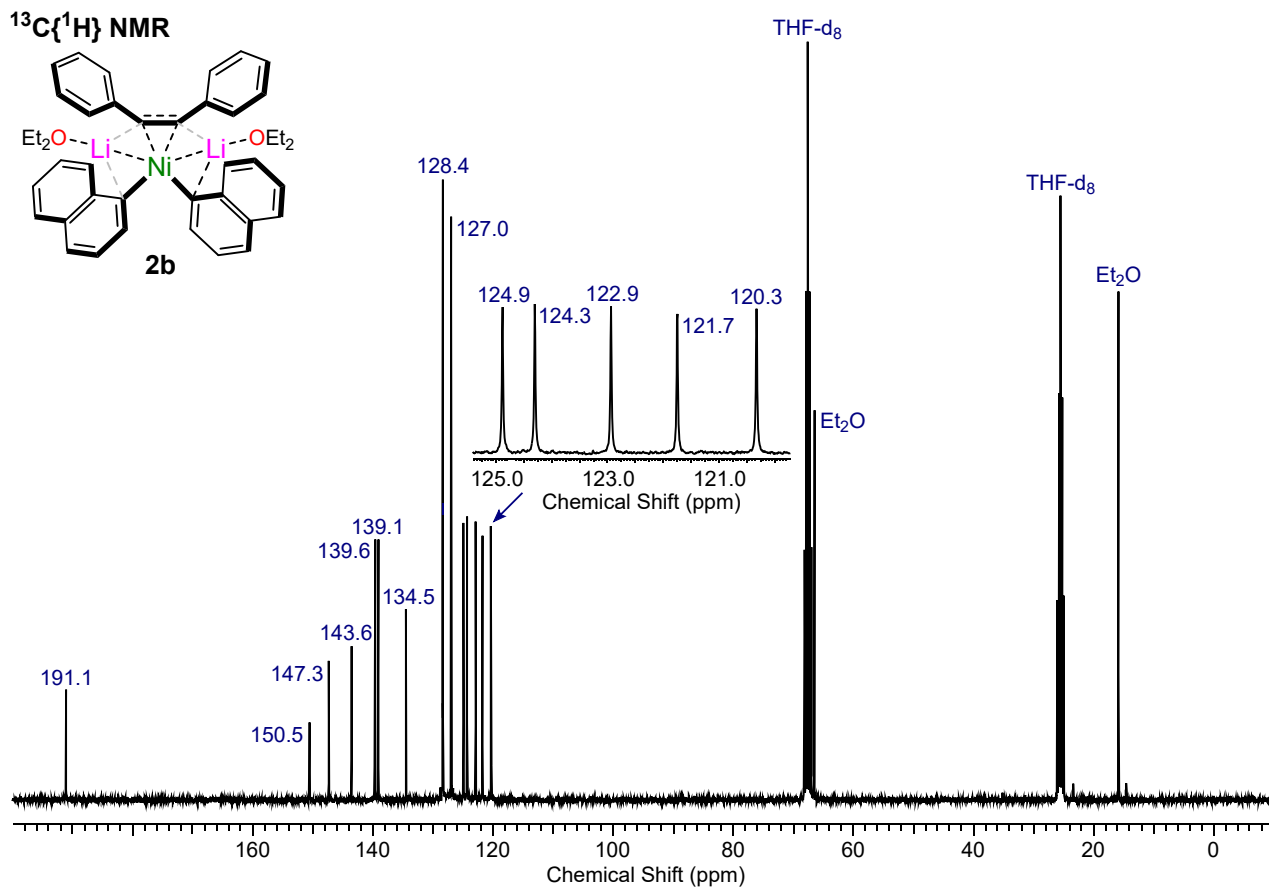

**Spectra S35:**  $^{13}\text{C}\{^1\text{H}\}$  NMR spectrum of **2b** in THF-d<sub>8</sub>.

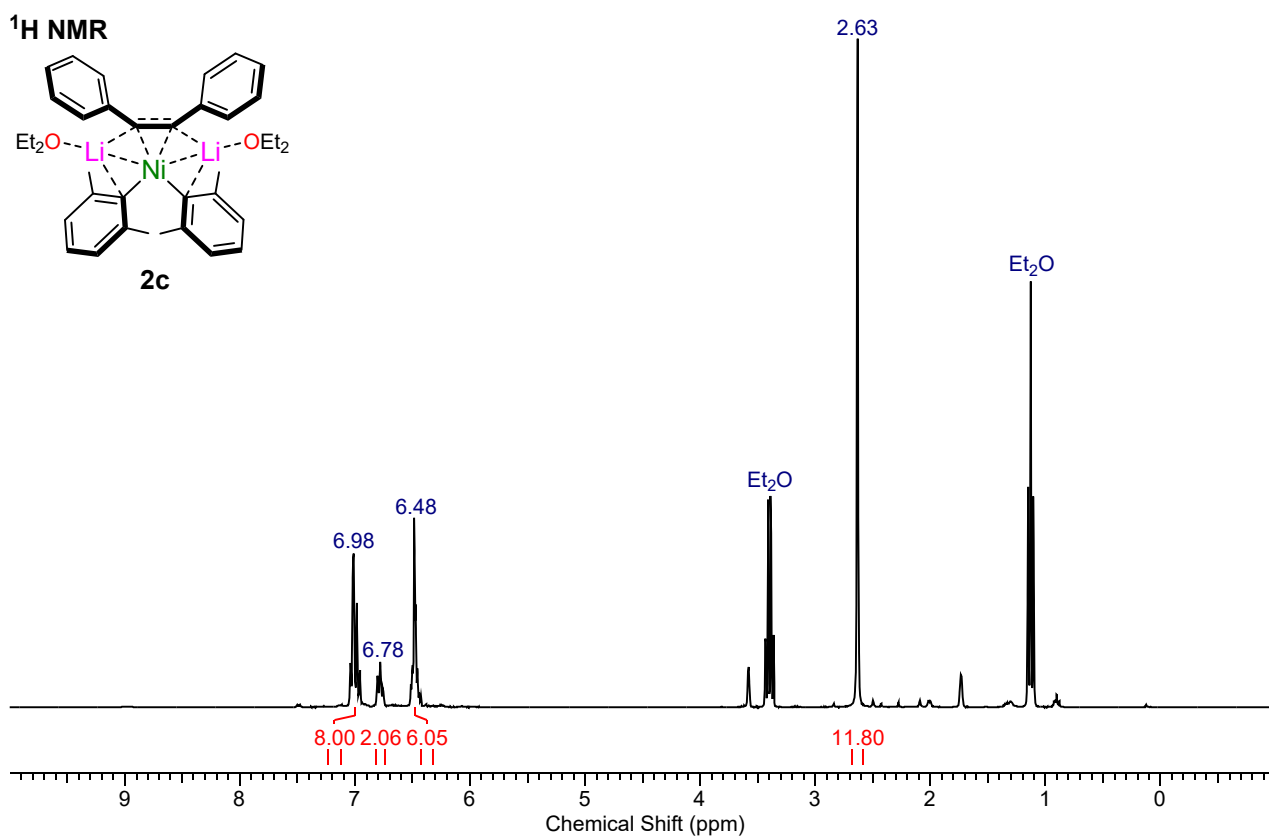

**Spectra S36:**  $^1\text{H}$  NMR spectrum of **2c** in THF-d<sub>8</sub>.

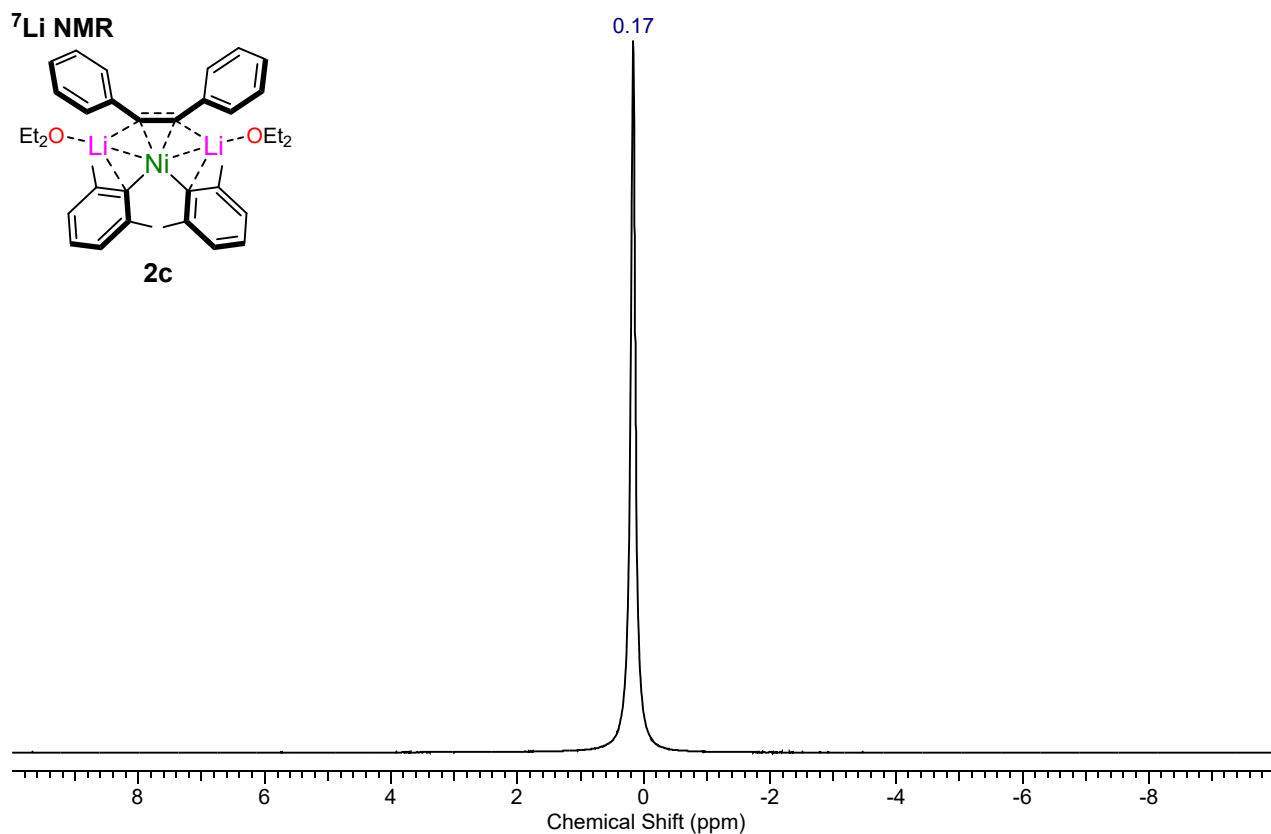

**Spectra S37:** <sup>7</sup>Li NMR spectrum of **2c** in THF-d<sub>8</sub>.

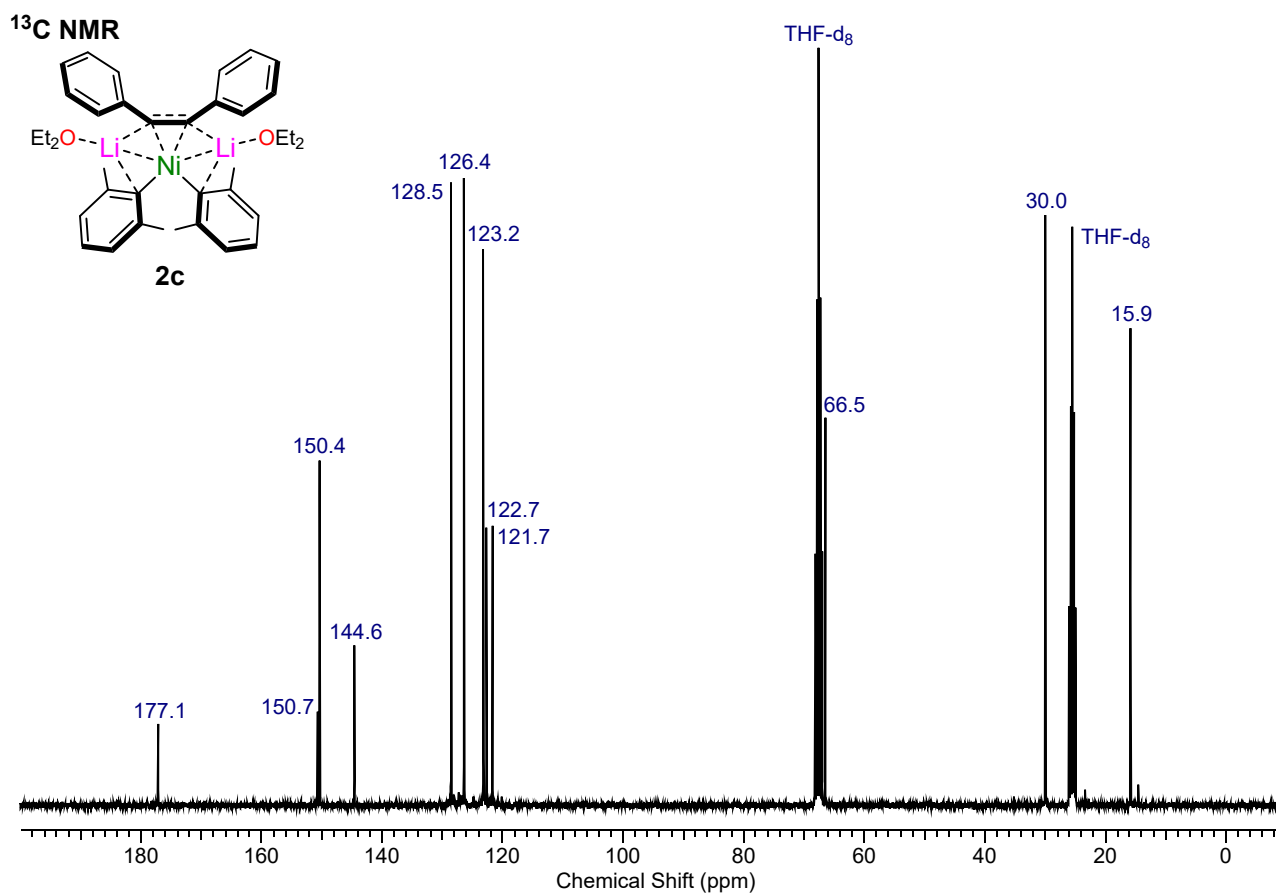

**Spectra S38:** <sup>13</sup>C{<sup>1</sup>H} NMR spectrum of **2c** in THF-d<sub>8</sub>.

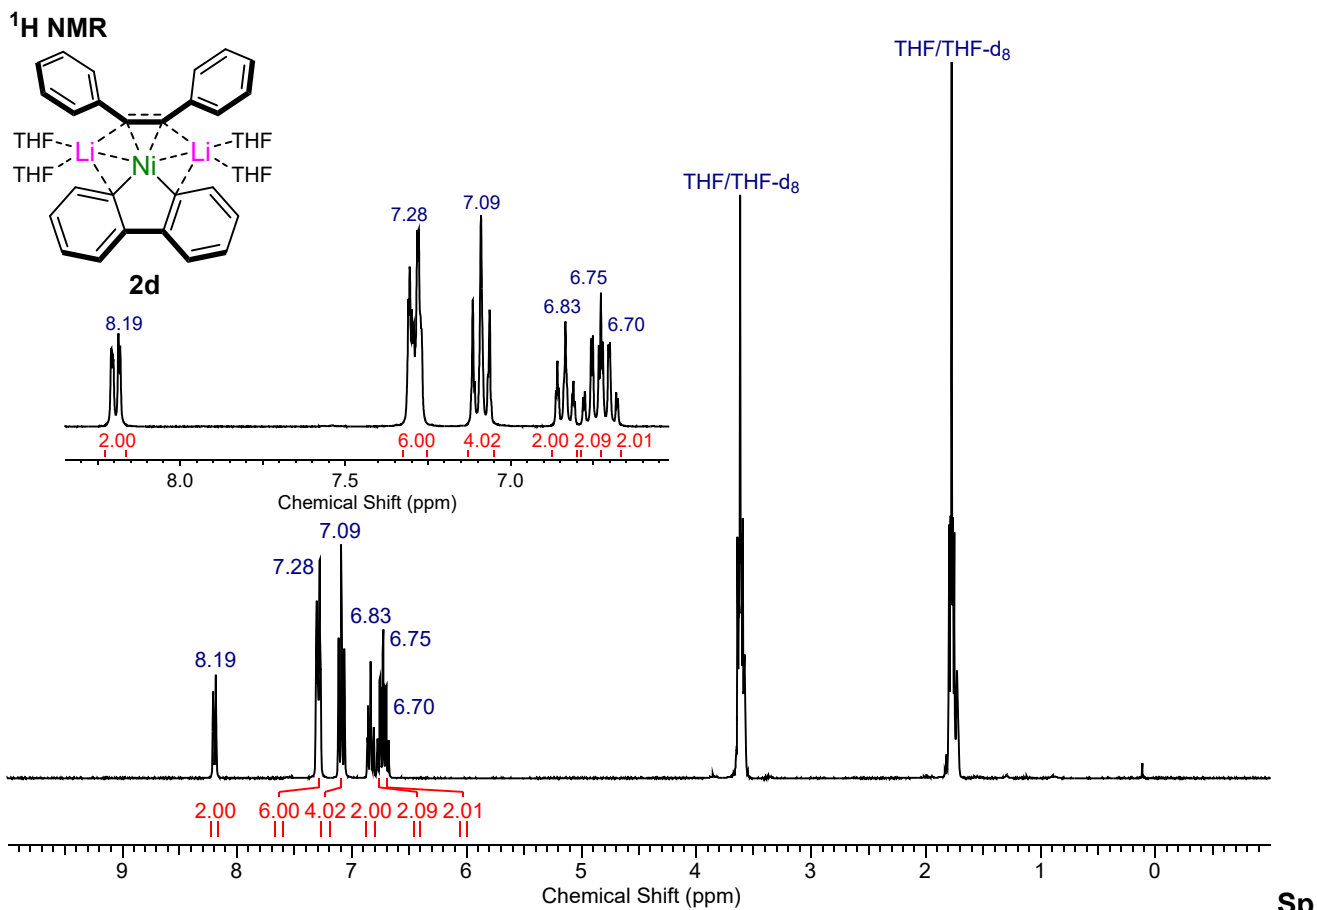

**Spectra S39:** <sup>1</sup>H NMR spectrum of **2d** in THF-d<sub>8</sub>.

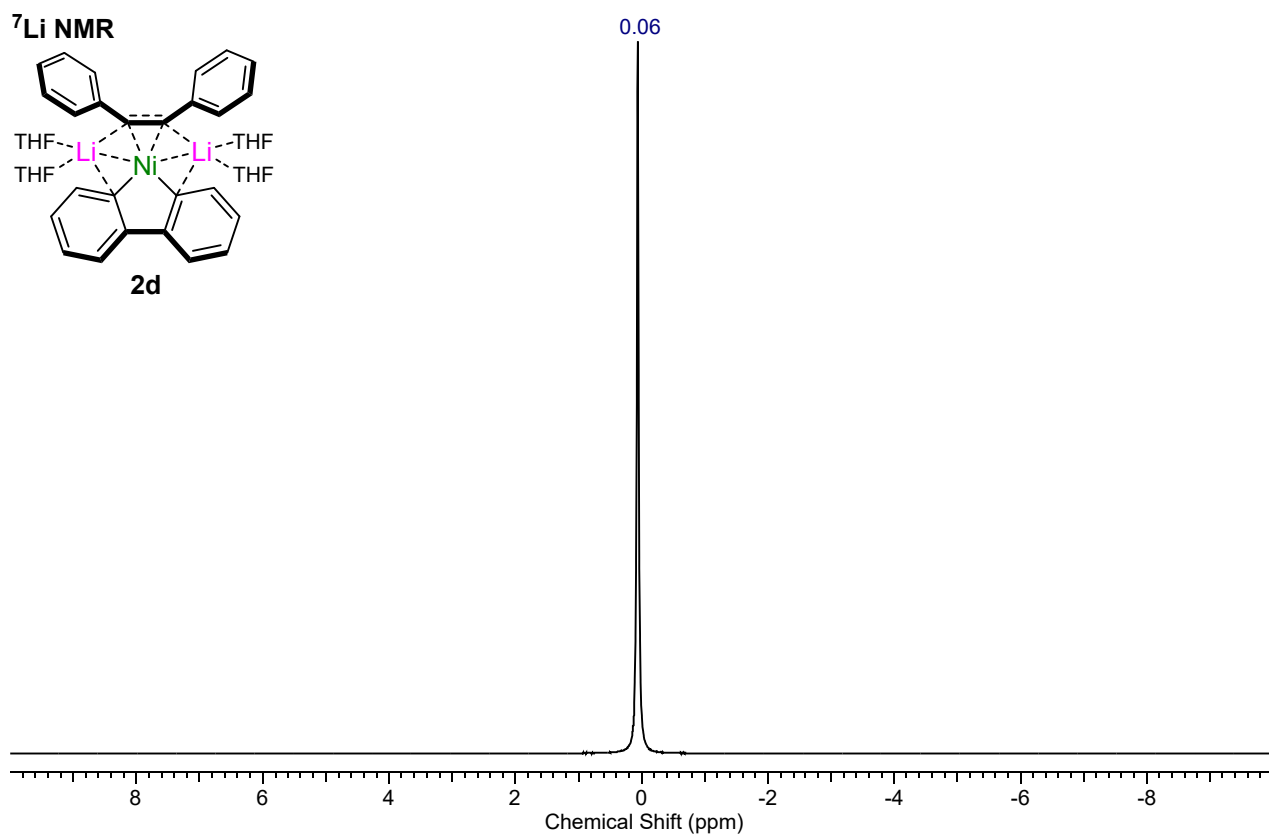

**Spectra S40:** <sup>7</sup>Li NMR spectrum of **2d** in THF-d<sub>8</sub>.



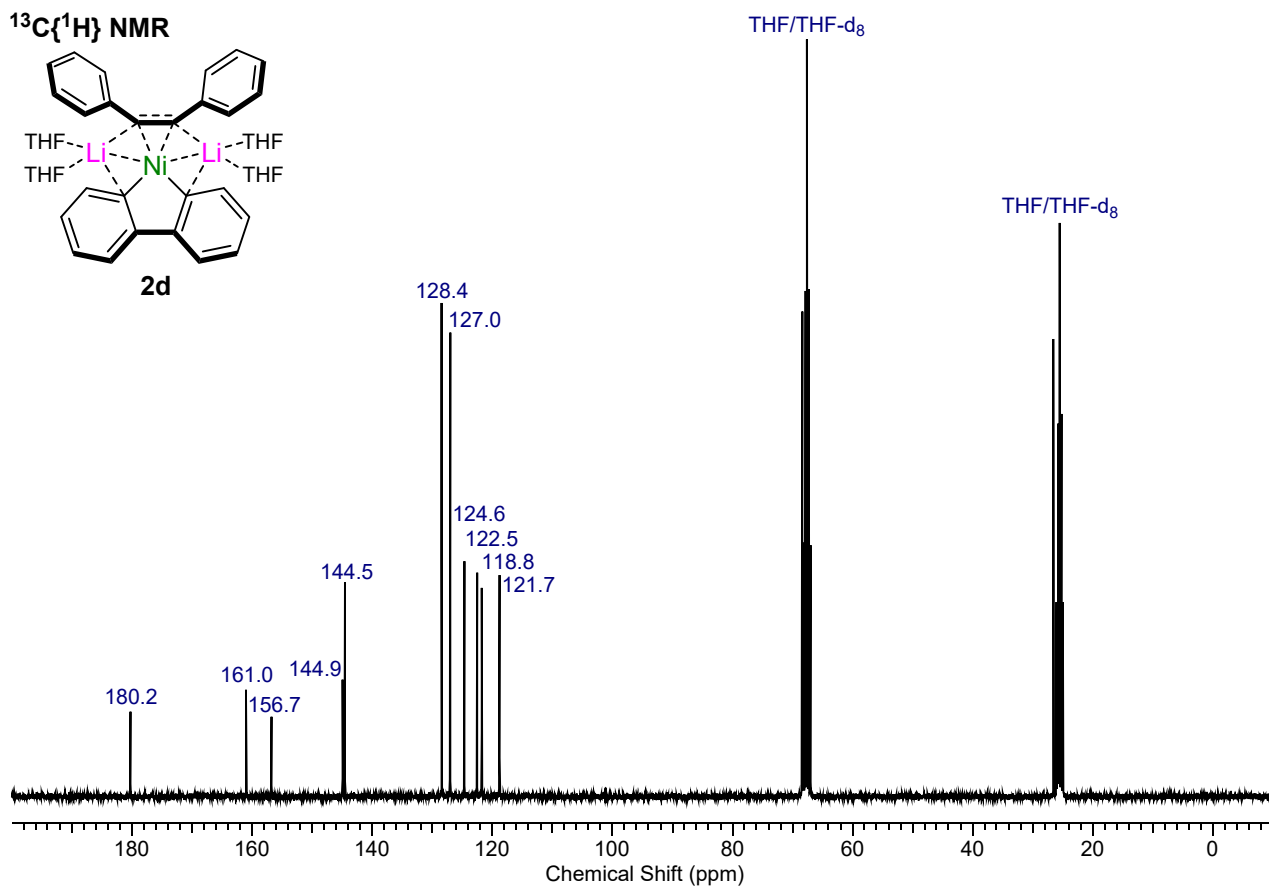

**Spectra S41:** <sup>13</sup>C{<sup>1</sup>H} NMR spectrum of **2d** in THF-d<sub>8</sub>.

## References

- (1) Borys, A. M. The Schlenk Line Survival Guide <https://schlenklinesurvivalguide.com>. (Accessed January 2023)
- (2) Borys, A. M.; Malaspina, L. A.; Grabowsky, S.; Hevia, E. Towards Hexagonal Planar Nickel: A Dispersion-Stabilised Tri-Lithium Nickelate. *Angew. Chem. Int. Ed.* **2022**, *61*, e202209797. <https://doi.org/10.1002/anie.202209797>.
- (3) Borys, A. M.; Hevia, E. The Anionic Pathway in the Nickel-Catalysed Cross-Coupling of Aryl Ethers. *Angew. Chem. Int. Ed.* **2021**, *60* (46), 24659–24667. <https://doi.org/10.1002/anie.202110785>.
- (4) Somerville, R. J.; Borys, A. M.; Perez-Jimenez, M.; Nova, A.; Balcells, D.; Malaspina, L. A.; Grabowsky, S.; Carmona, E.; Hevia, E.; Campos, J. Unmasking the Constitution and Bonding of the Proposed Lithium Nickelate “Li<sub>3</sub>NiPh<sub>3</sub>(solv)<sub>3</sub>”: Revealing the Hidden C<sub>6</sub>H<sub>4</sub> Ligand. *Chem. Sci.* **2022**, *13* (18), 5268–5276. <https://doi.org/10.1039/D2SC01244H>.
- (5) Hübner, A.; Diehl, A. M.; Bolte, M.; Lerner, H. W.; Wagner, M. High-Temperature Reactivity of the Strongly Electrophilic Pristine 9 H-9-Borafluorene. *Organometallics* **2013**, *32* (22), 6827–6833. <https://doi.org/10.1021/om4005737>.

- (6) Muetterties, E. L.; Pretzer, W. R.; Thomas, M. G.; Beier, B. F.; Thorn, D. L.; Day, V. W.; Anderson, A. B. Metal Clusters in Catalysis. 14.1 The Chemistry of Dinuclear Metal-Acetylene Complexes. *J. Am. Chem. Soc.* **1978**, *100* (7), 2090–2096. <https://doi.org/10.1021/ja00475a019>.
- (7) Oxford Diffraction. CrysAlisPro. 2018.
- (8) Sheldrick, G. M. SHELXT - Integrated Space-Group and Crystal-Structure Determination. *Acta Cryst.* **2015**, *A71* (1), 3–8. <https://doi.org/10.1107/S2053273314026370>.
- (9) Sheldrick, G. M. Crystal Structure Refinement with SHELXL. *Acta Cryst.* **2015**, *C71*, 3–8. <https://doi.org/10.1107/S2053229614024218>.
- (10) Dolomanov, O. V.; Bourhis, L. J.; Gildea, R. J.; Howard, J. A. K.; Puschmann, H. OLEX2: A Complete Structure Solution, Refinement and Analysis Program. *J. Appl. Crystallogr.* **2009**, *A42* (2), 339–341. <https://doi.org/10.1107/S0021889808042726>.
